# Supplementary material for: Clues of Lithosphere, Atmosphere and Ionosphere Variations Possibly Related to the Preparation of La Palma 19 September 2021 Volcano Eruption
Source: MDPI journal article supplement (doi:10.3390/rs14195001), 2022-10-08

## **2° Supplementary Materials (Swarm magnetic tracks) of**

### **Clues of Lithosphere, Atmosphere and Ionosphere alterations possibly related to the preparation of La Palma 19 September 2021 volcano eruption.**

**Dedalo Marchetti <sup>1</sup>, Kaiguang Zhu<sup>1,\*</sup>, Hanshuo Zhang<sup>1</sup>, Zeren Zhima<sup>2</sup>, Rui Yan<sup>2</sup>, Shen Xuhui<sup>2</sup>, Wenqi Chen <sup>1</sup>, Yuqi Cheng<sup>1</sup>, Xiaodan He <sup>1</sup>, Ting Wang <sup>1</sup>, Jiami Wen <sup>1</sup>, Donghua Zhang <sup>1</sup> and Yiqun Zhang<sup>1</sup>**

<sup>1</sup> College of Instrumentation and Electrical Engineering, Jilin University, Changchun 130061, China

<sup>2</sup> Space Observation Research Center, National Institute of Natural Hazards, MEMC, Beijing 100085, China

\* Correspondence: zhukaiguang@jlu.edu.cn

In this supplementary material, all the Swarm tracks that present any anomaly in at least one of the components of the geomagnetic field are reported.

The anomalous window (defined as explained in Appendix B of the main manuscript) is red-coloured.

The title of each figure reports the satellite (A = Alpha, B = Bravo, C = Charlie), the track number, the mean Local and UT Time at the track centre and the geomagnetic condition. The residuals for X, Y, and Z components and scalar F are reported and a map showing the track projection on the satellite is shown on the right with brown color if Flags are okay or red if some Flags underline some unusual operating conditions. On the second line of the title is also reported the total sum of anomalous flags for Absolute Scalar Magnetometer (ASM, Flag\_F), Vector Field Magnetometer (VFM, Flag\_B), attitude data (Flag\_q) and for the overall status of the spacecraft platform (Flag\_platform). The total number of points is also reported.

SAT.:C.Y/M/D:2021/4/6. Track n.:3 D.meanLT:0:33:55,meanUTC:1:34:4, Dst=6nT, ap=0nTS=-1  
Flag\_F: 1089 Flag\_B: 0 Flag\_q: 0 Flag\_platform: 5 point number : 1089

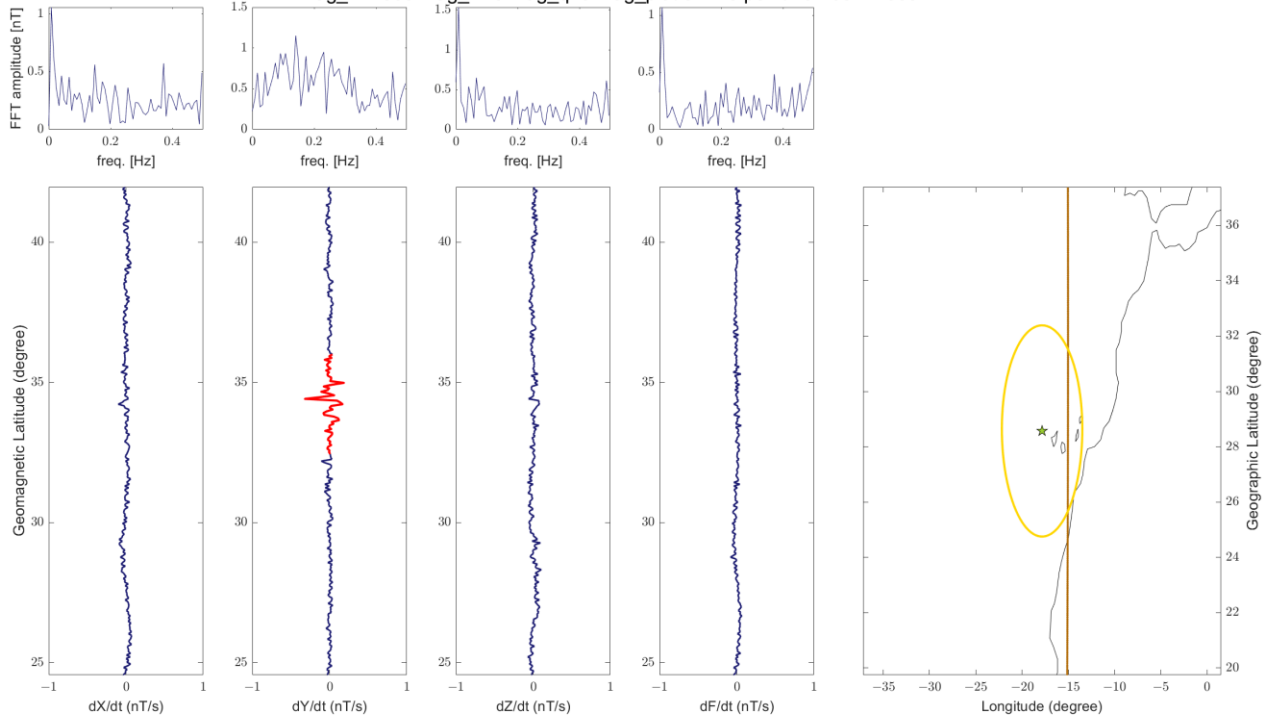

SAT.:A.Y/M/D:2021/4/6. Track n.:3 D.meanLT:0:32:30,meanUTC:1:34:10, Dst=6nT, ap=0nTS=-1  
Flag\_F: 1089 Flag\_B: 0 Flag\_q: 0 Flag\_platform: 20 point number : 1089

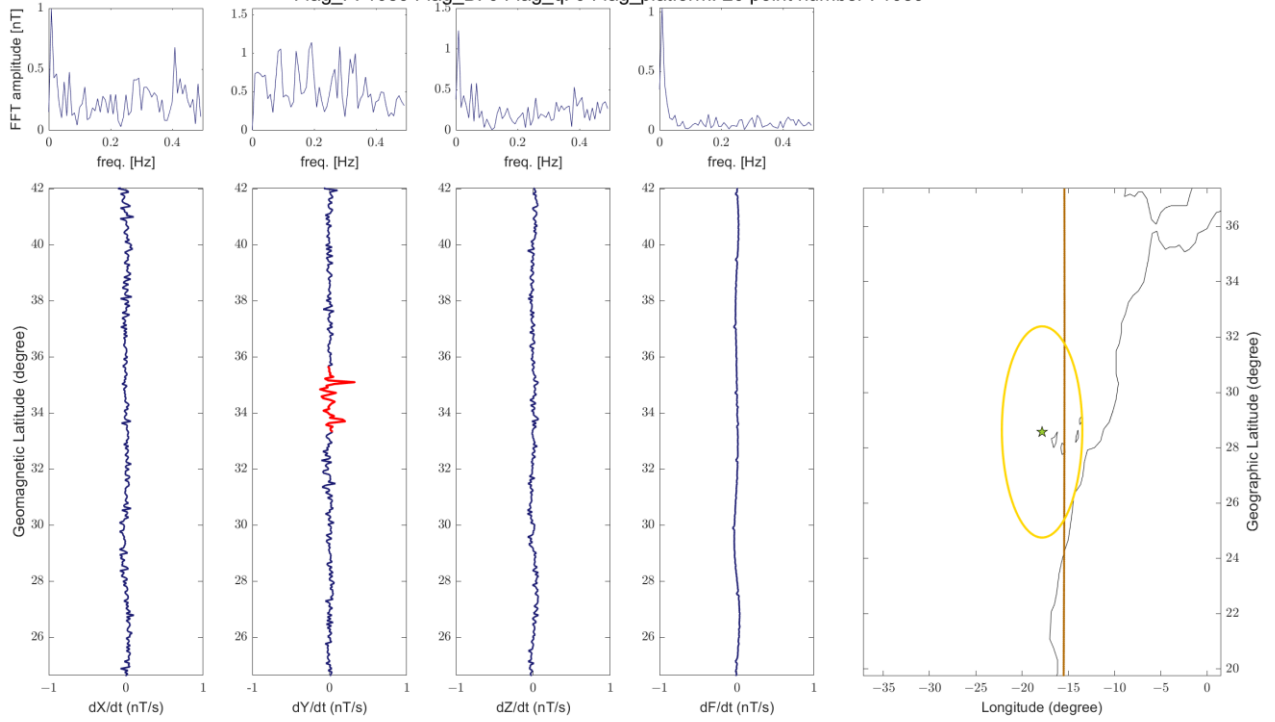

SAT.:C.Y/M/D:2021/4/8. Track n.:3 D.meanLT:0:23:4,meanUTC:1:44:38, Dst=-6nT, ap=4nTS=-1  
Flag\_F: 1089 Flag\_B: 0 Flag\_q: 0 Flag\_platform: 5 point number : 1089

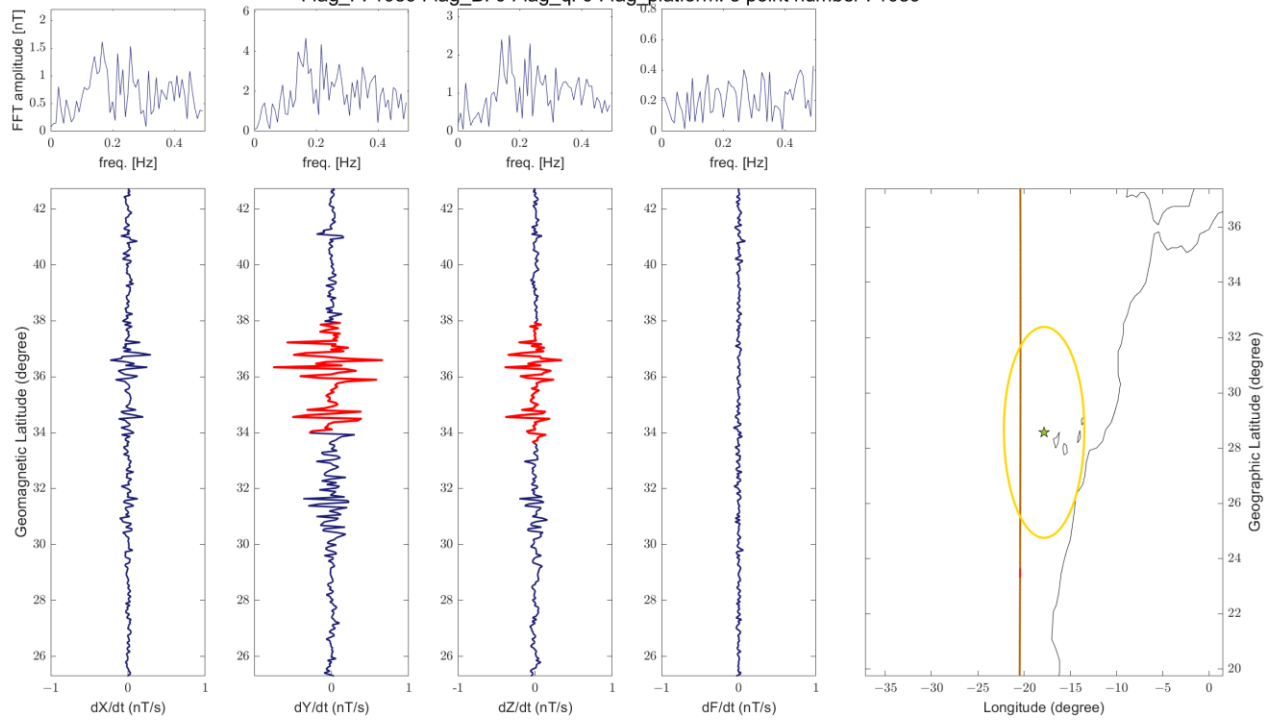

SAT.:A.Y/M/D:2021/4/8. Track n.:3 D.meanLT:0:21:40,meanUTC:1:44:44, Dst=-6nT, ap=4nTS=-1  
Flag\_F: 1089 Flag\_B: 0 Flag\_q: 0 Flag\_platform: 5 point number : 1089

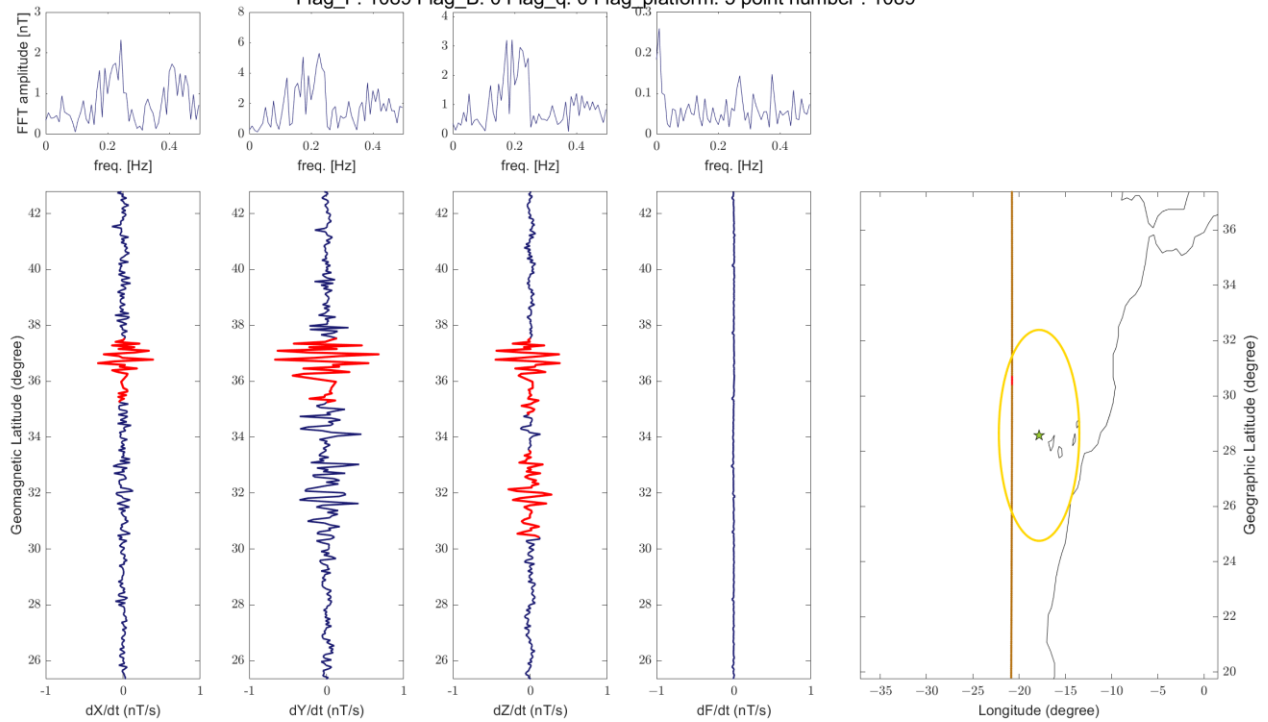

SAT.:B.Y/M/D:2021/4/16. Track n.:1 U.meanLT:23:4:40,meanUTC:0:13:42, Dst=15nT, ap=7nTS=-1  
Flag\_F: 1104 Flag\_B: 0 Flag\_q: 0 Flag\_platform: 20 point number : 1104

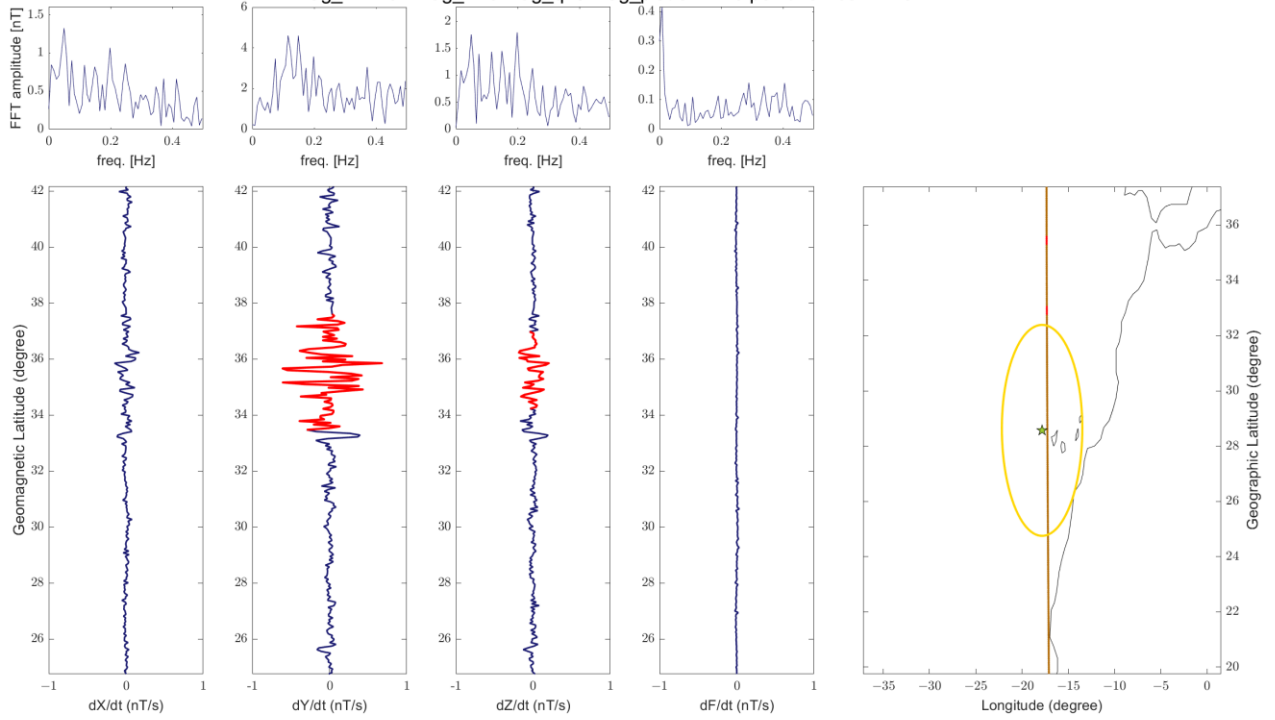

SAT.:C.Y/M/D:2021/4/16. Track n.:2 D.meanLT:23:40:1,meanUTC:0:53:31, Dst=15nT, ap=7nTS=-1  
Flag\_F: 1088 Flag\_B: 0 Flag\_q: 0 Flag\_platform: 35 point number : 1088

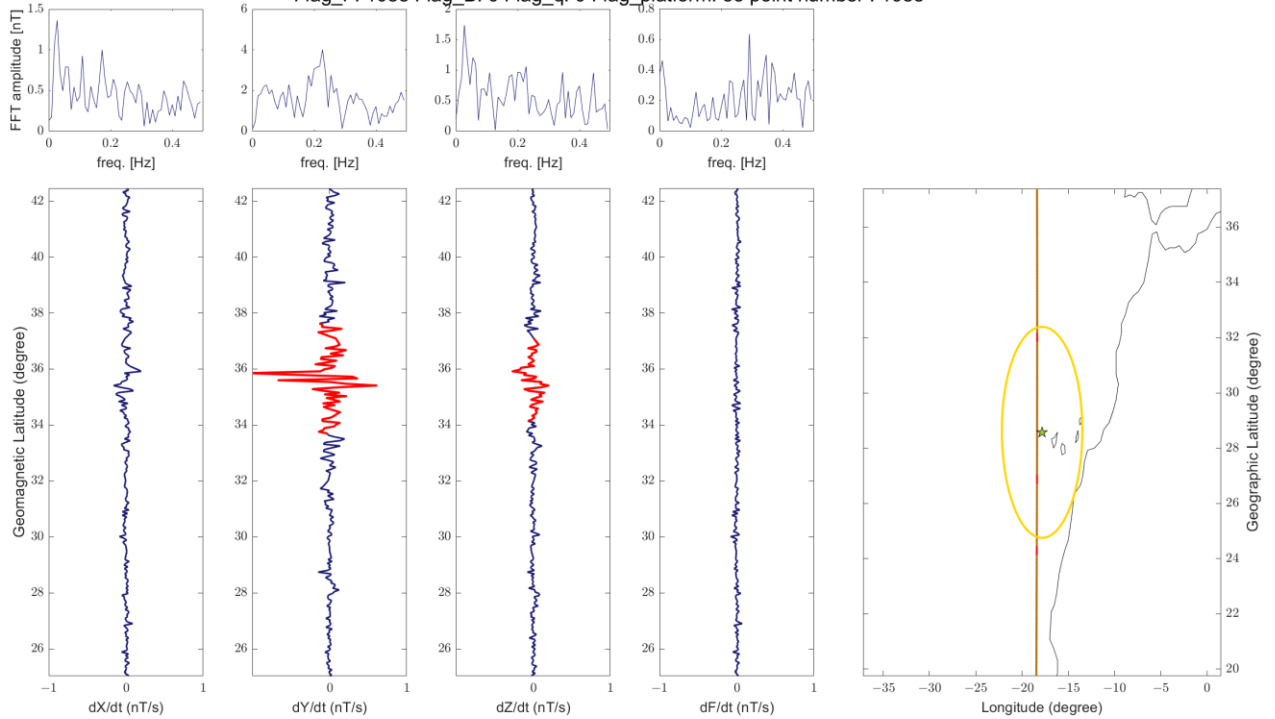

SAT.:A.Y/M/D:2021/4/16. Track n.:2 D.meanLT:23:38:41,meanUTC:0:53:37, Dst=15nT, ap=7nTS=-1  
Flag\_F: 1088 Flag\_B: 0 Flag\_q: 0 Flag\_platform: 5 point number : 1088

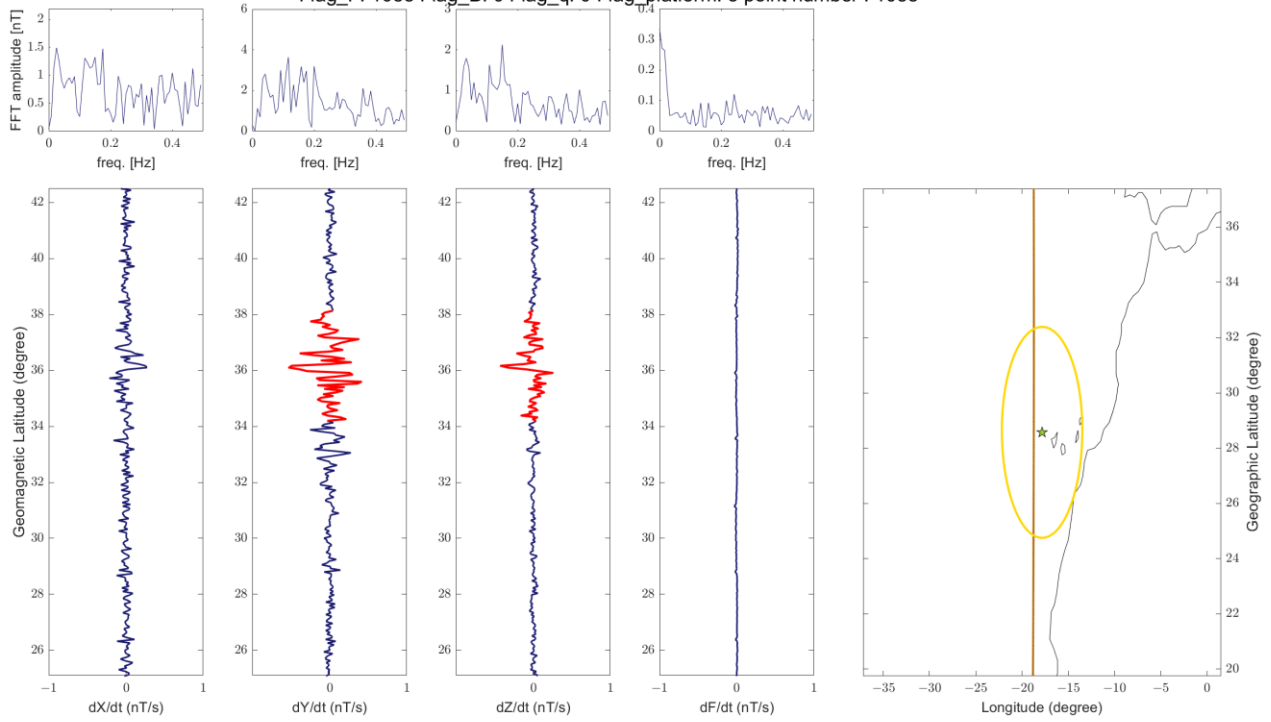

SAT.:A.Y/M/D:2021/4/21. Track n.:17 U.meanLT:11:20:36,meanUTC:12:27:23, Dst=-9nT, ap=6nTS=-1  
Flag\_F: 1088 Flag\_B: 0 Flag\_q: 0 Flag\_platform: 5 point number : 1088

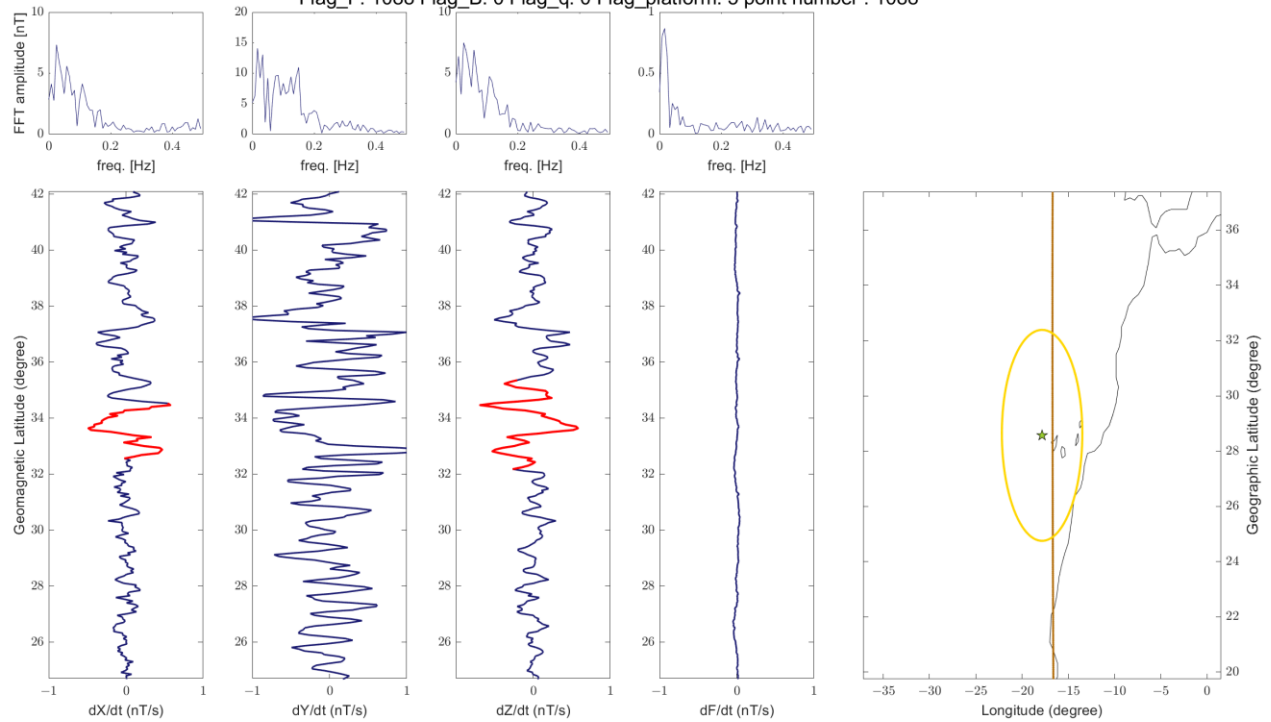

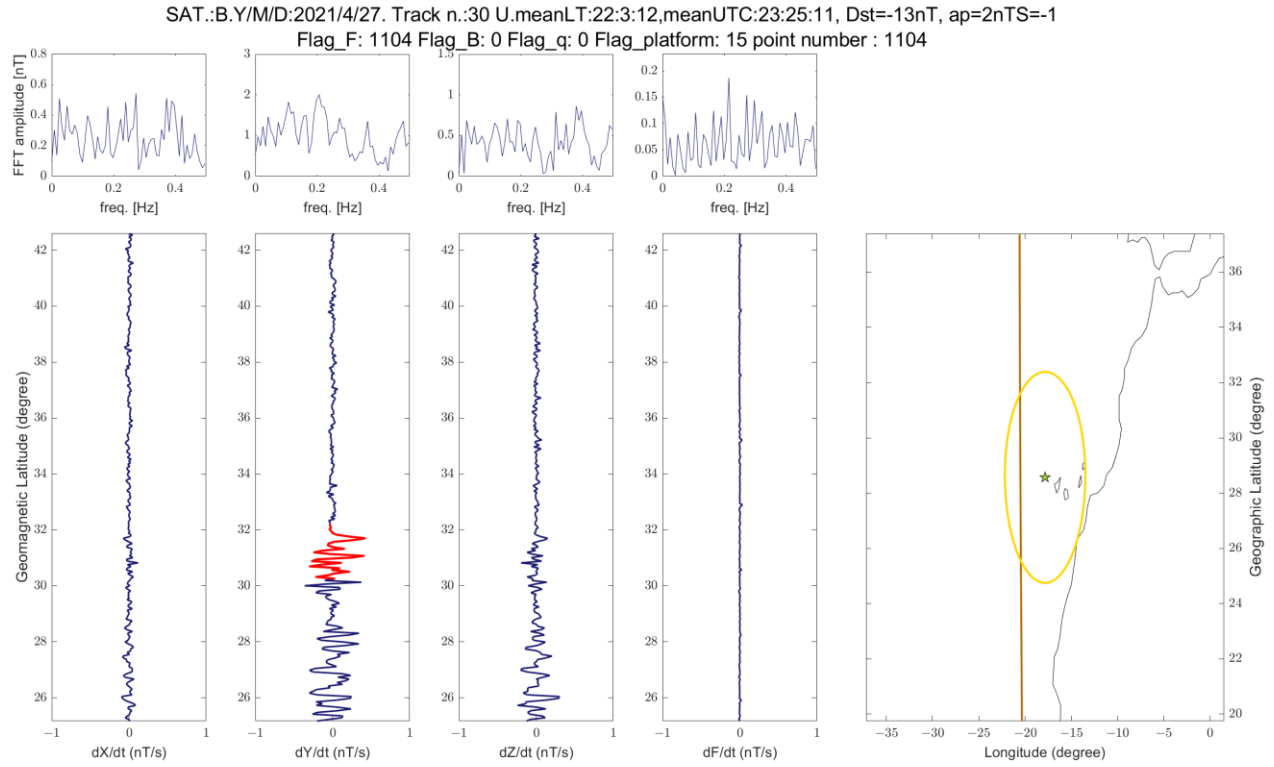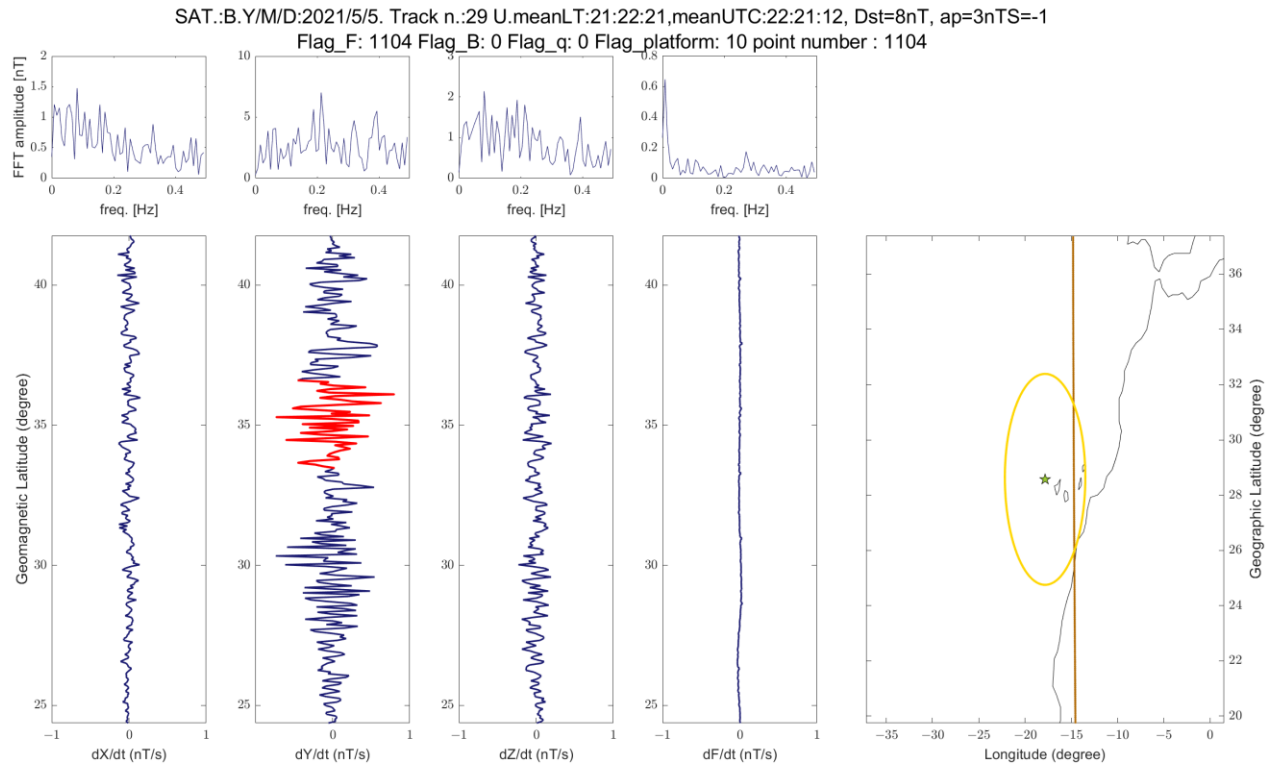

SAT.:B.Y/M/D:2021/5/10. Track n.:29 U.meanLT:20:56:41,meanUTC:22:16:42, Dst=0nT, ap=5nTS=-1  
Flag\_F: 1104 Flag\_B: 0 Flag\_q: 0 Flag\_platform: 25 point number : 1104

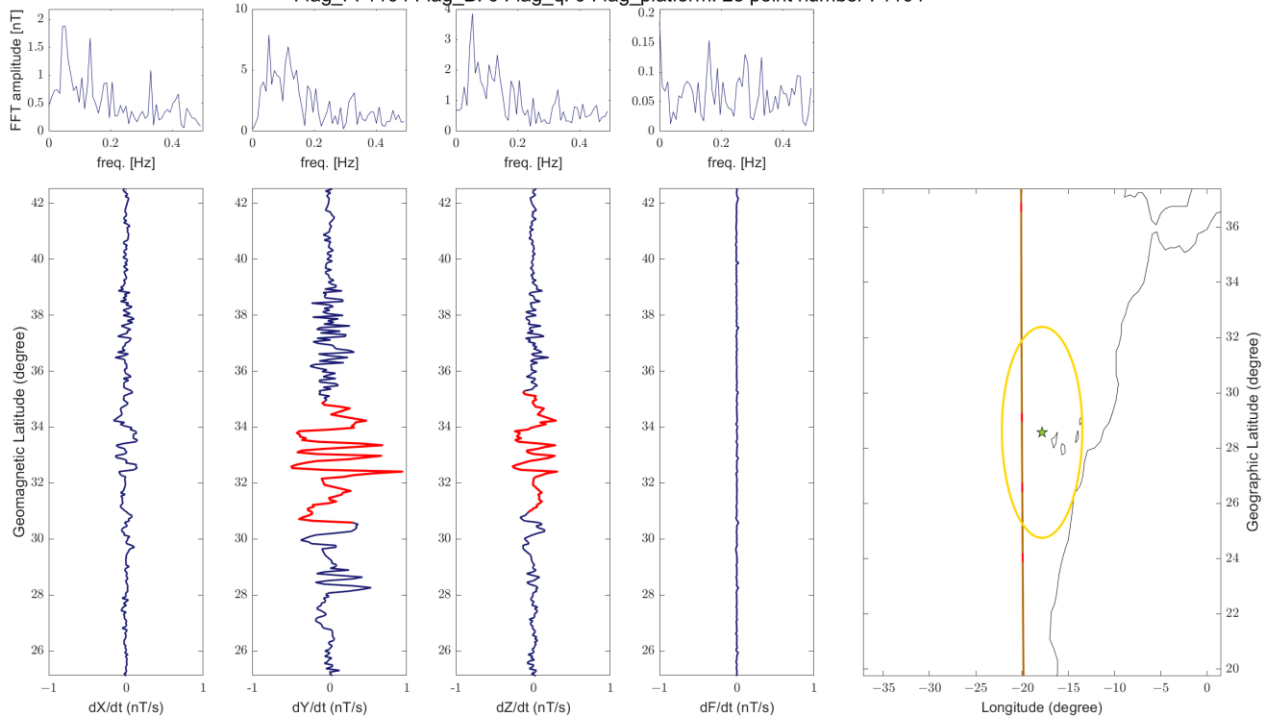

SAT.:B.Y/M/D:2021/5/11. Track n.:29 U.meanLT:20:51:37,meanUTC:21:56:51, Dst=5nT, ap=2nTS=-1  
Flag\_F: 1105 Flag\_B: 0 Flag\_q: 0 Flag\_platform: 10 point number : 1105

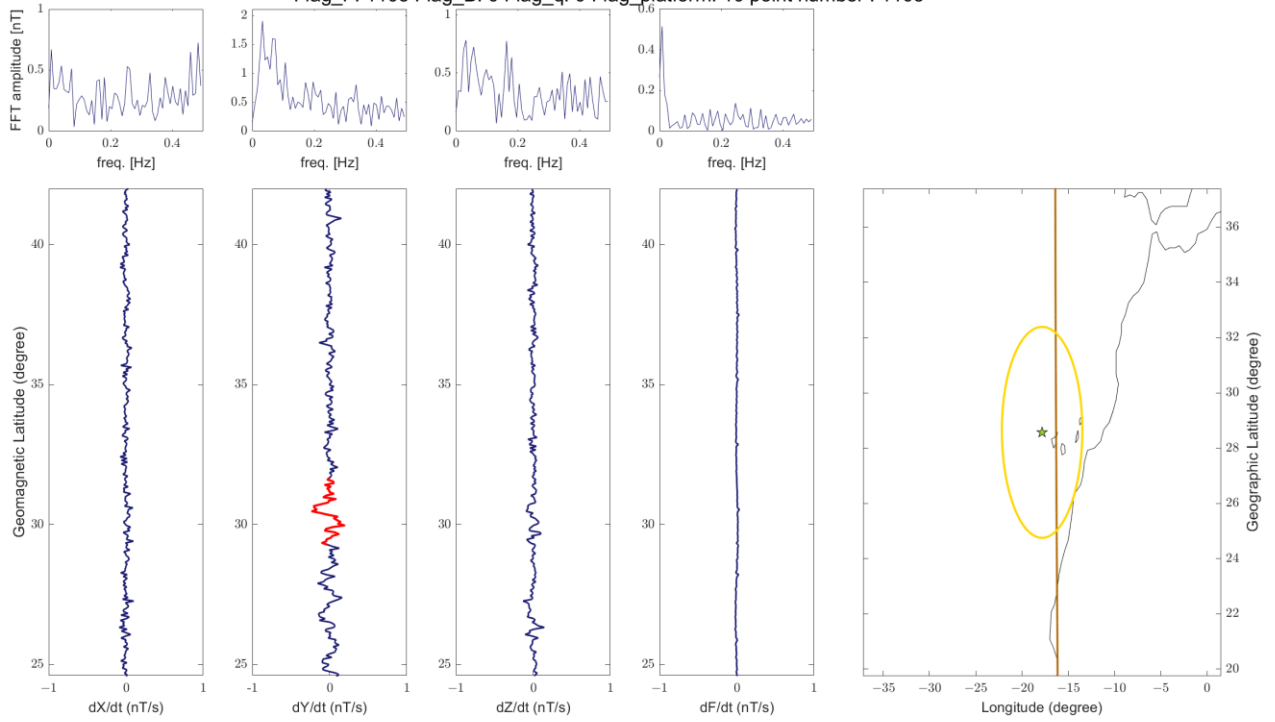

SAT.:C.Y/M/D:2021/5/16. Track n.:30 D.meanLT:20:53:1,meanUTC:22:8:8, Dst=-20nT, ap=3nTS=-1

Flag\_F: 1089 Flag\_B: 0 Flag\_q: 0 Flag\_platform: 10 point number : 1089

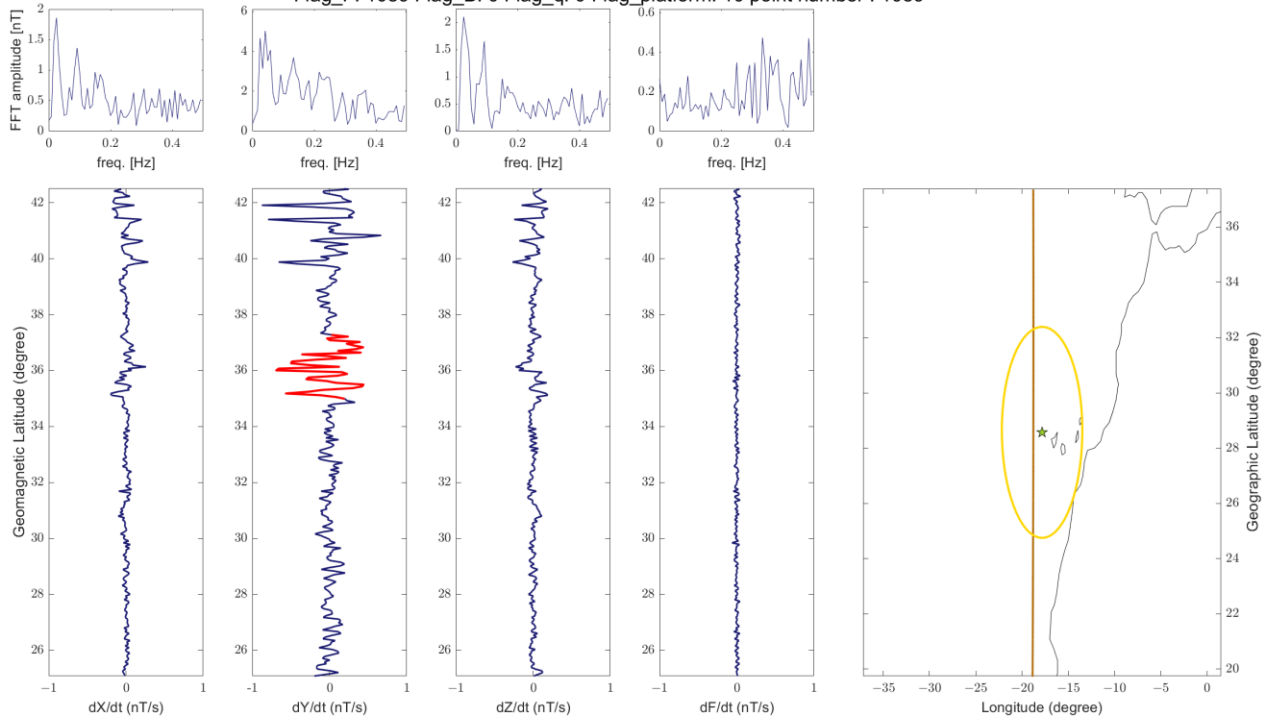

SAT.:B.Y/M/D:2021/5/17. Track n.:13 D.meanLT:8:13:40,meanUTC:9:27:18, Dst=-12nT, ap=4nTS=-1

Flag\_F: 1104 Flag\_B: 0 Flag\_q: 0 Flag\_platform: 30 point number : 1104

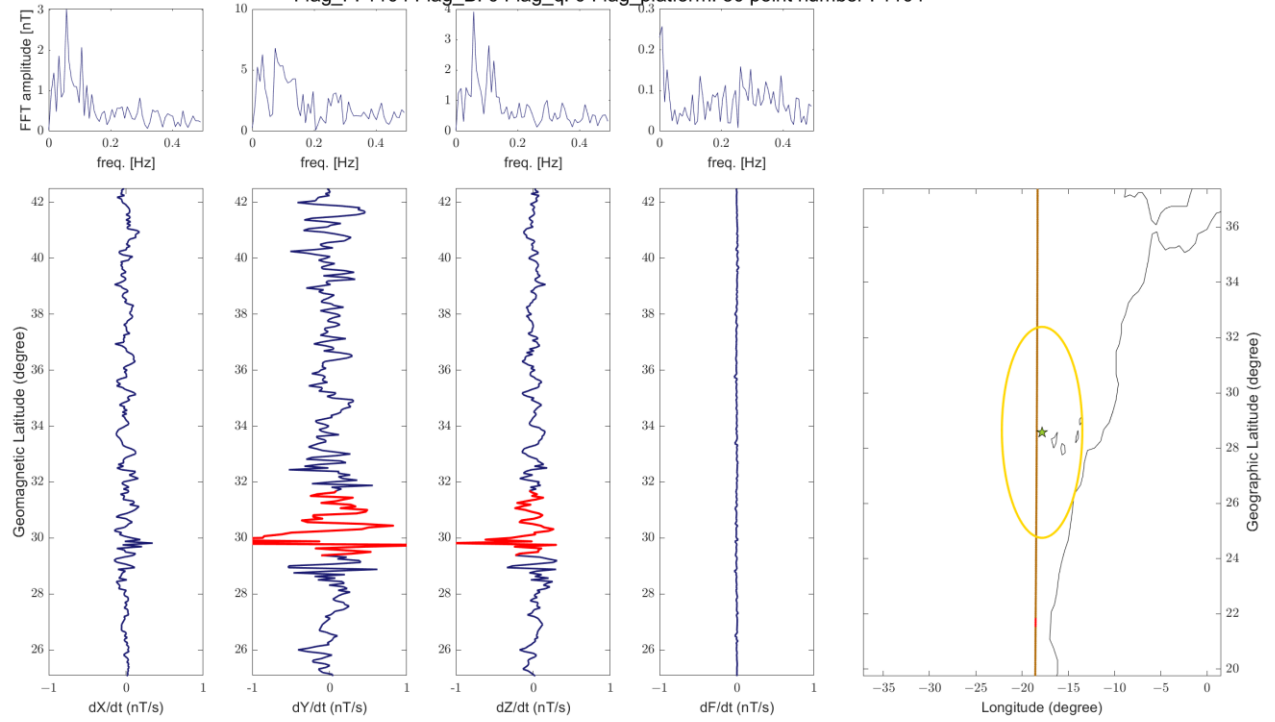

SAT.:C.Y/M/D:2021/5/19. Track n.:14 U.meanLT:8:51:4,meanUTC:10:12:34, Dst=6nT, ap=3nTS=-1  
Flag\_F: 1089 Flag\_B: 0 Flag\_q: 0 Flag\_platform: 15 point number : 1089

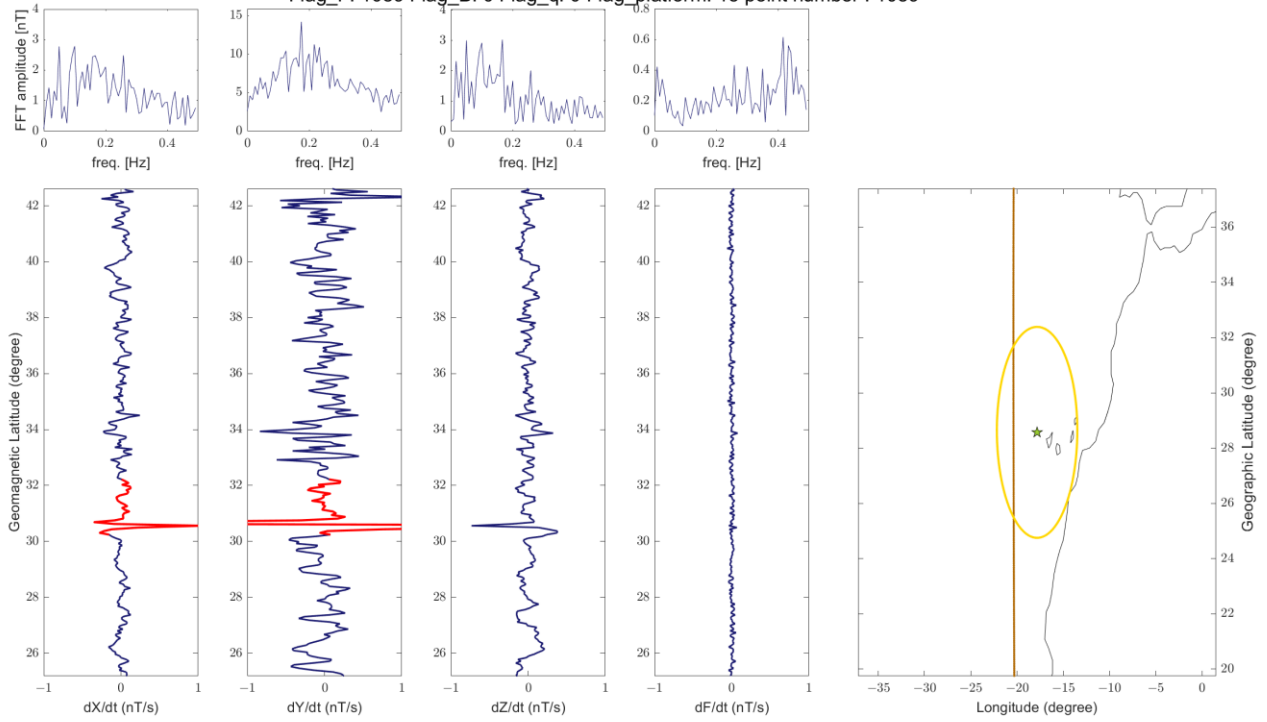

SAT.:A.Y/M/D:2021/5/19. Track n.:14 U.meanLT:8:49:56,meanUTC:10:12:41, Dst=6nT, ap=3nTS=-1  
Flag\_F: 56 Flag\_B: 0 Flag\_q: 0 Flag\_platform: 5 point number : 1089

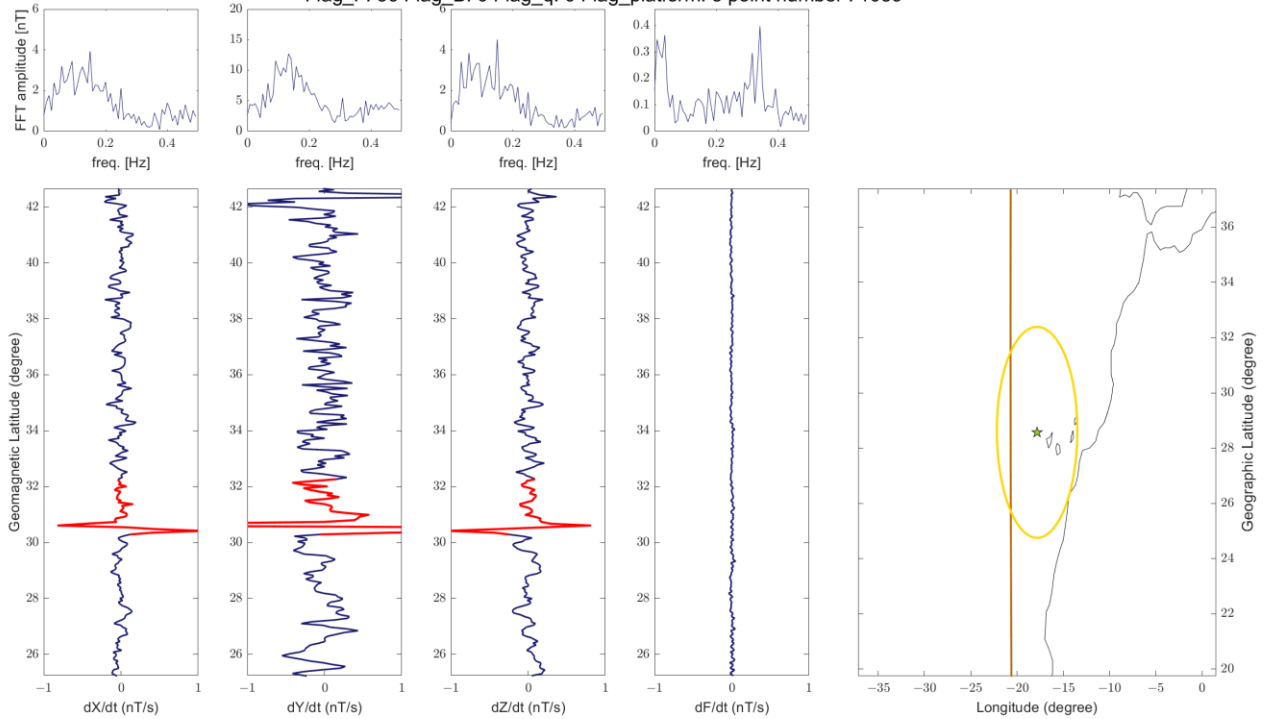

SAT.:C.Y/M/D:2021/5/19. Track n.:29 D.meanLT:20:36:54,meanUTC:21:36:56, Dst=1nT, ap=9nTS=-1  
Flag\_F: 1088 Flag\_B: 0 Flag\_q: 0 Flag\_platform: 10 point number : 1088

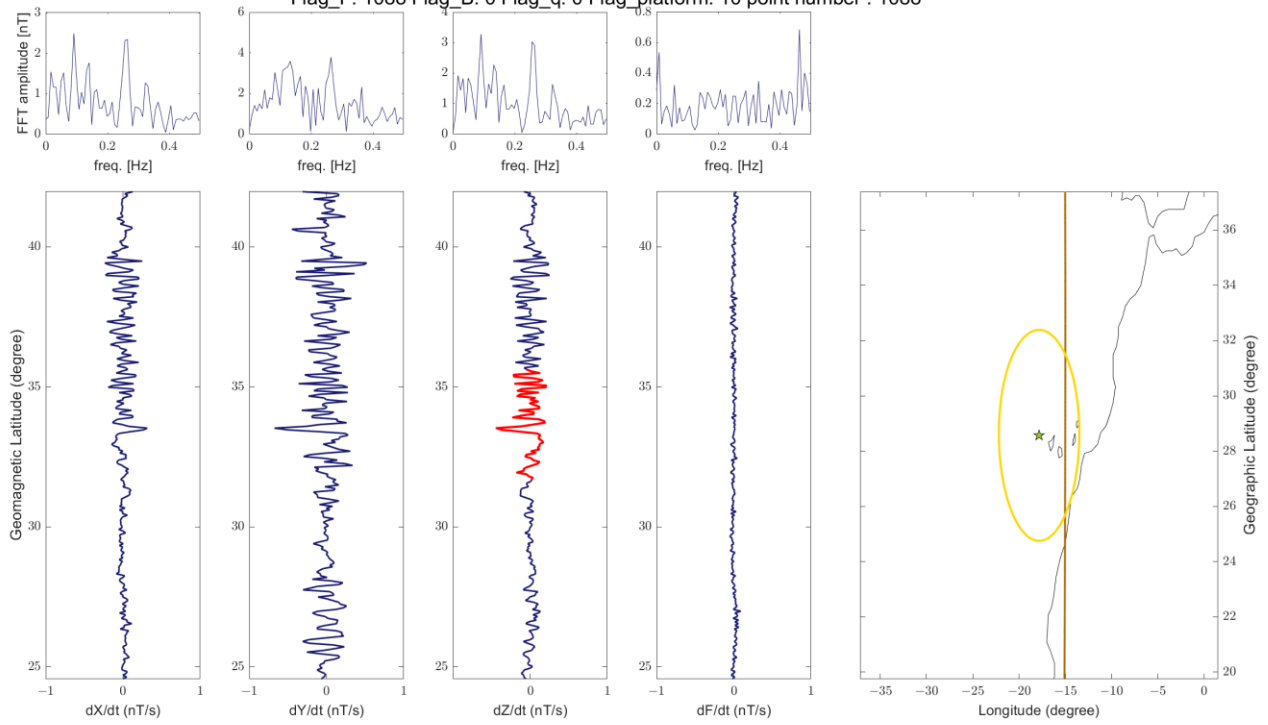

SAT.:A.Y/M/D:2021/5/19. Track n.:29 D.meanLT:20:35:51,meanUTC:21:37:3, Dst=1nT, ap=9nTS=-1  
Flag\_F: 56 Flag\_B: 0 Flag\_q: 0 Flag\_platform: 10 point number : 1088

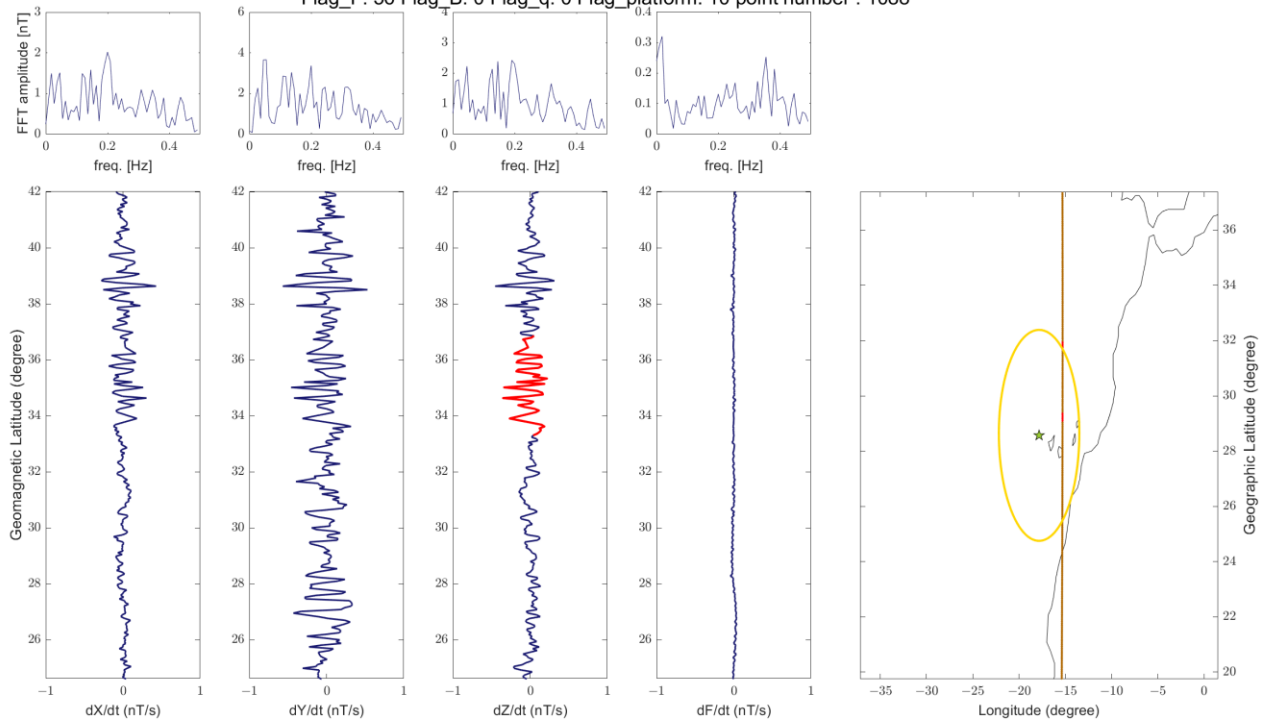

SAT.:C.Y/M/D:2021/5/21. Track n.:29 D.meanLT:20:26:4,meanUTC:21:47:12, Dst=-13nT, ap=3nTS=-1  
 Flag\_F: 1088 Flag\_B: 0 Flag\_q: 0 Flag\_platform: 0 point number : 1088

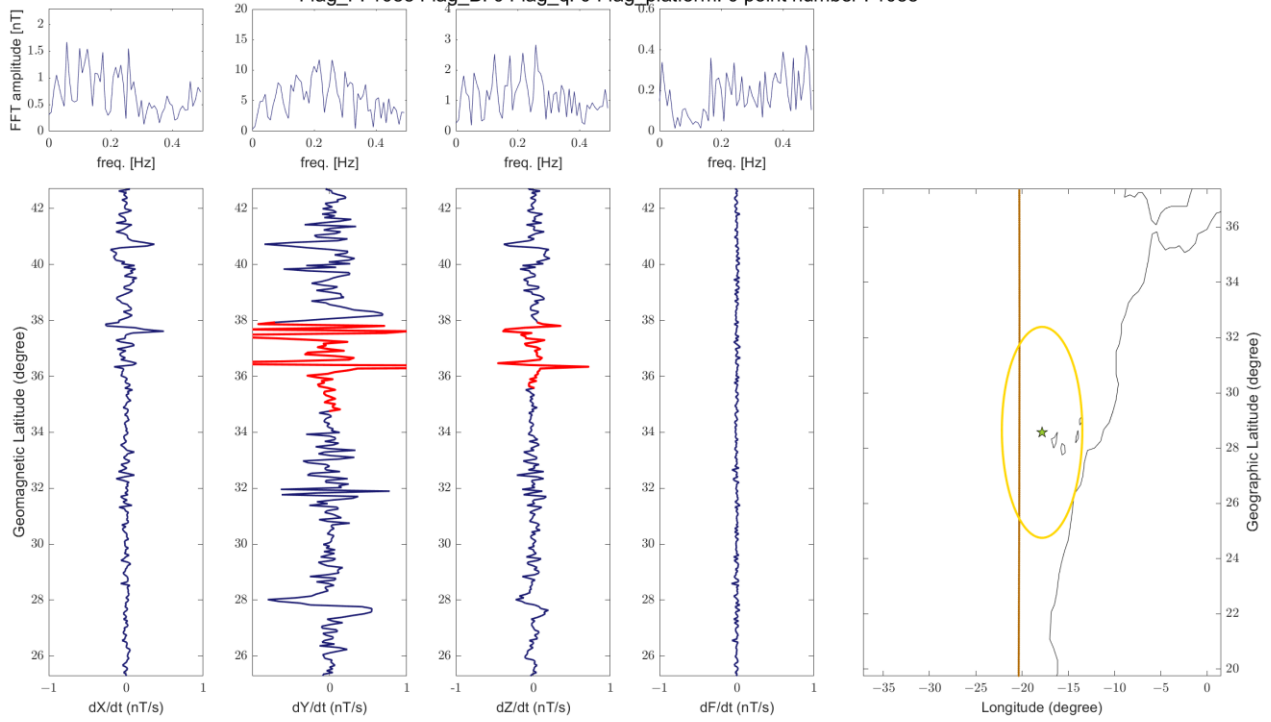

SAT.:A.Y/M/D:2021/5/21. Track n.:29 D.meanLT:20:25:1,meanUTC:21:47:19, Dst=-13nT, ap=3nTS=-1  
 Flag\_F: 56 Flag\_B: 0 Flag\_q: 0 Flag\_platform: 5 point number : 1088

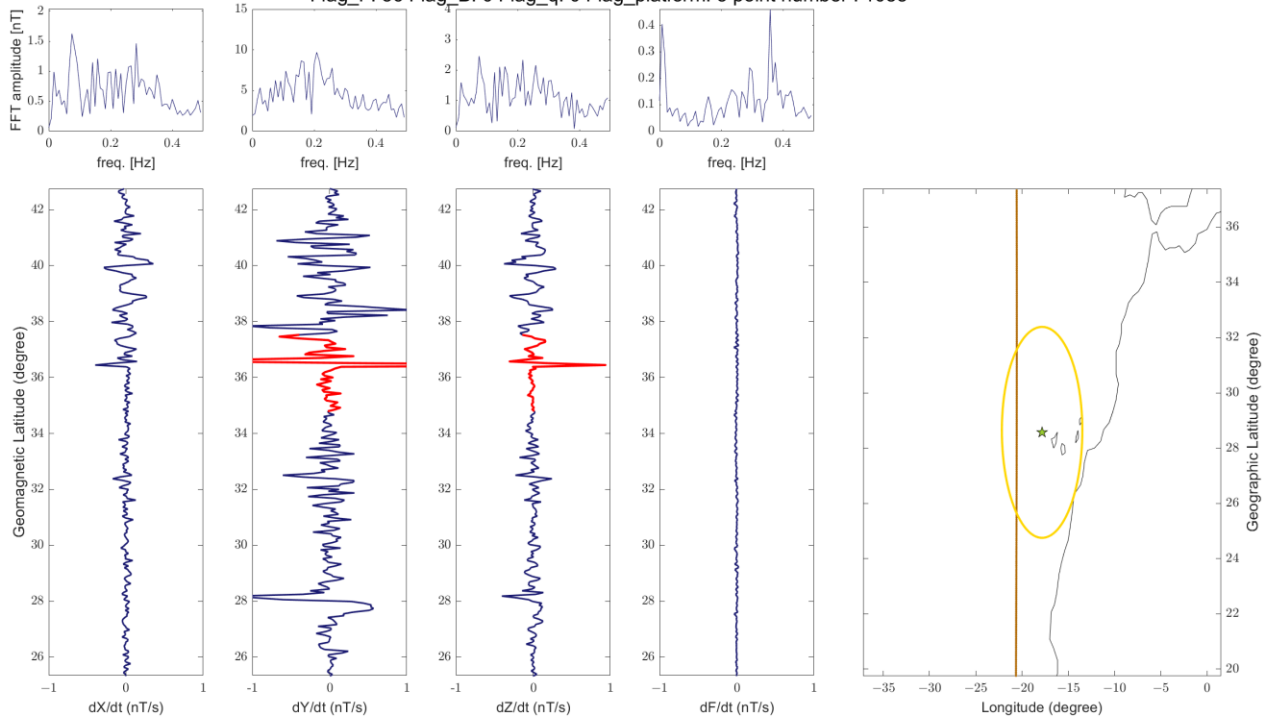

SAT.:B.Y/M/D:2021/5/23. Track n.:13 D.meanLT:7:42:56,meanUTC:9:2:54, Dst=-8nT, ap=3nTS=-1  
Flag\_F: 1105 Flag\_B: 0 Flag\_q: 0 Flag\_platform: 5 point number : 1105

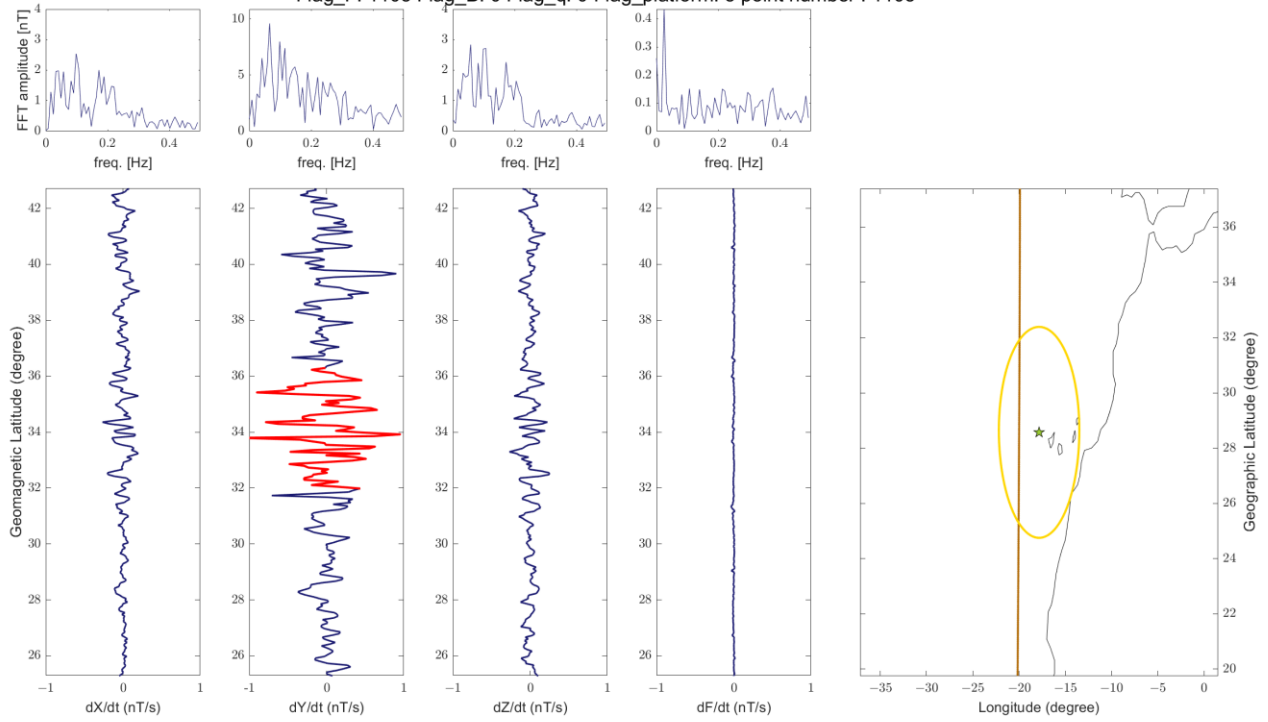

SAT.:B.Y/M/D:2021/5/23. Track n.:28 U.meanLT:19:50:8,meanUTC:21:8:5, Dst=-12nT, ap=3nTS=-1  
Flag\_F: 1104 Flag\_B: 0 Flag\_q: 0 Flag\_platform: 15 point number : 1104

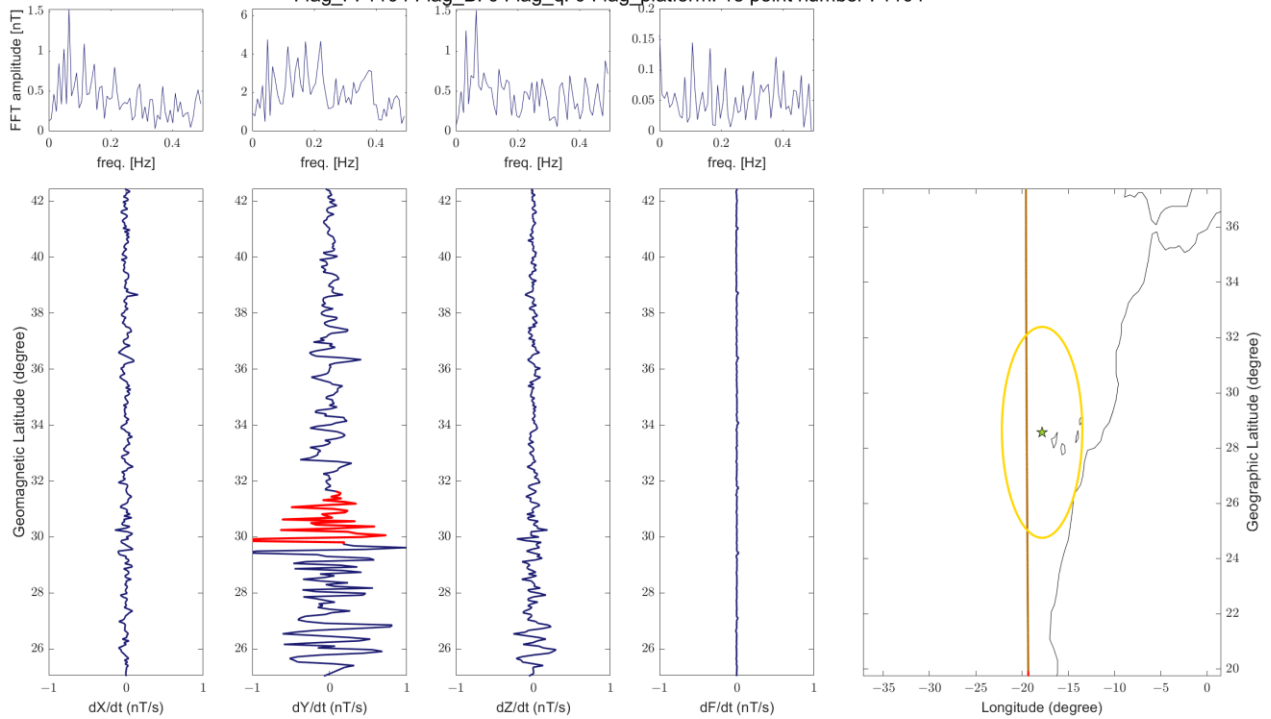

SAT.:B.Y/M/D:2021/5/24. Track n.:12 D.meanLT:7:37:52,meanUTC:8:43:3, Dst=-5nT, ap=0nTS=-1

Flag\_F: 1105 Flag\_B: 0 Flag\_q: 0 Flag\_platform: 10 point number : 1105

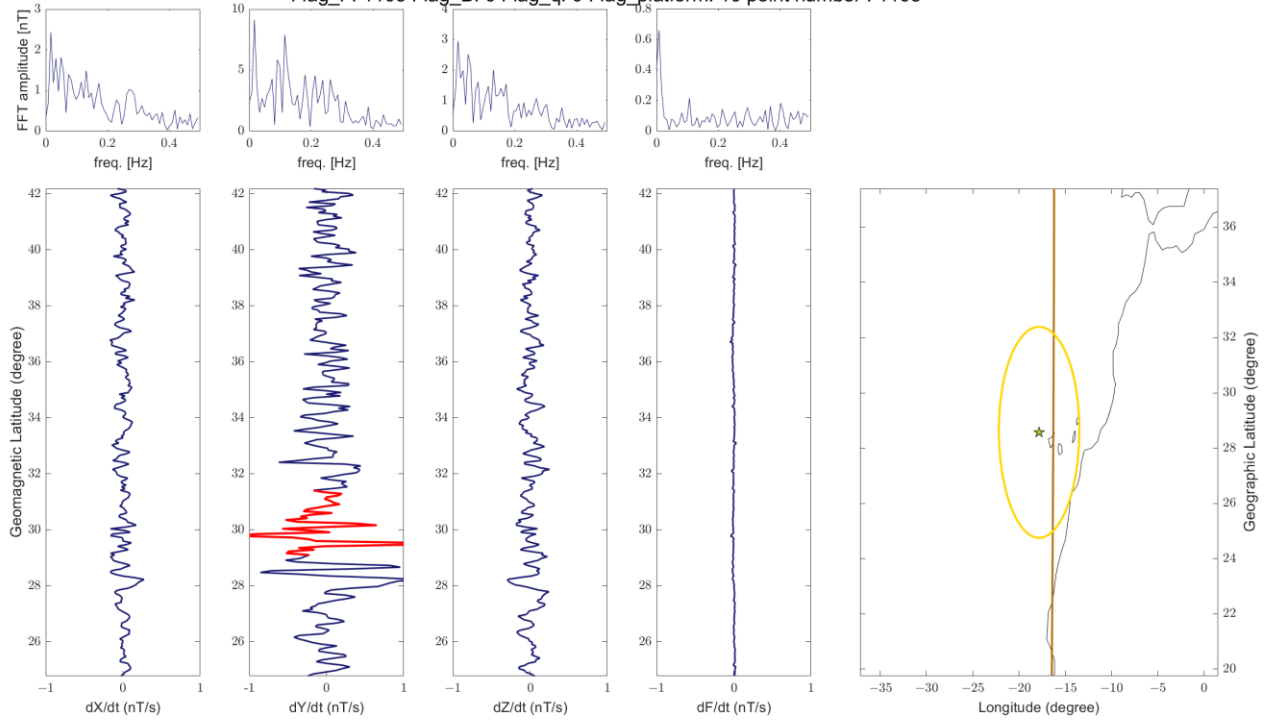

SAT.:C.Y/M/D:2021/5/24. Track n.:13 U.meanLT:8:24:6,meanUTC:9:51:36, Dst=-4nT, ap=3nTS=-1

Flag\_F: 1088 Flag\_B: 0 Flag\_q: 0 Flag\_platform: 5 point number : 1088

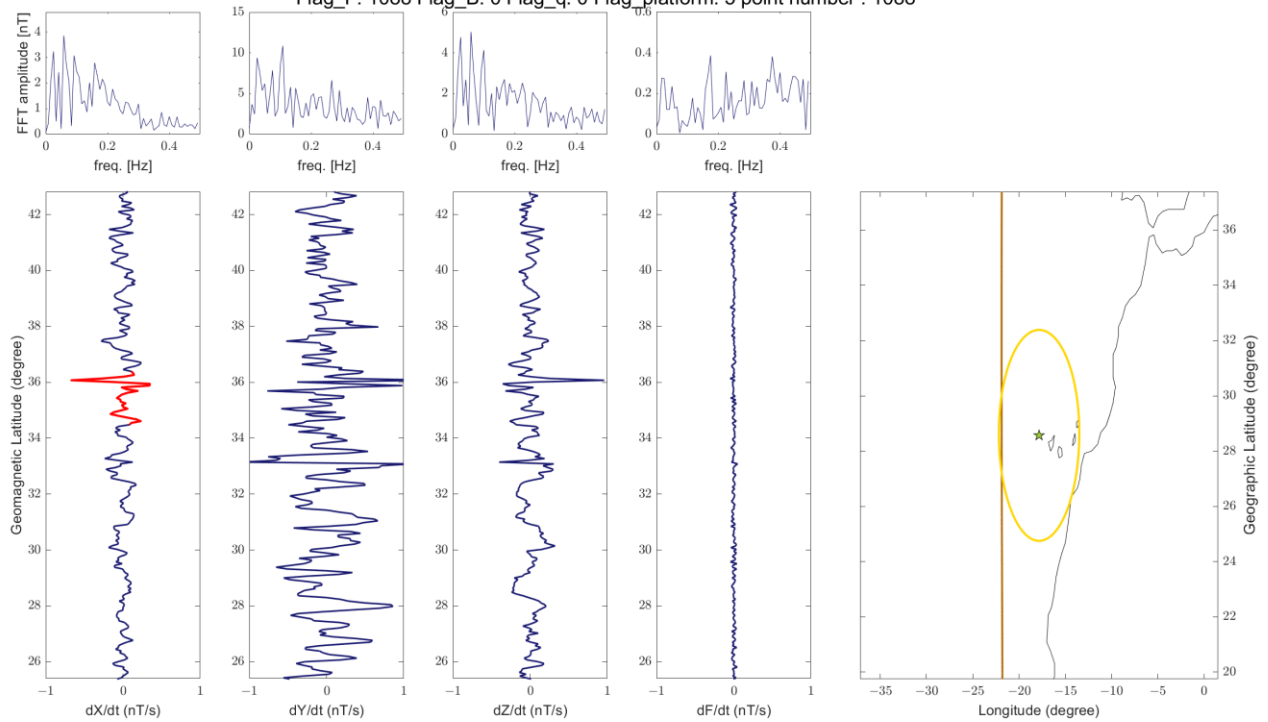

SAT.:C.Y/M/D:2021/6/3. Track n.:28 D.meanLT:19:16:1,meanUTC:20:33:47, Dst=-1nT, ap=3nTS=-1  
 Flag\_F: 1088 Flag\_B: 0 Flag\_q: 0 Flag\_platform: 5 point number : 1088

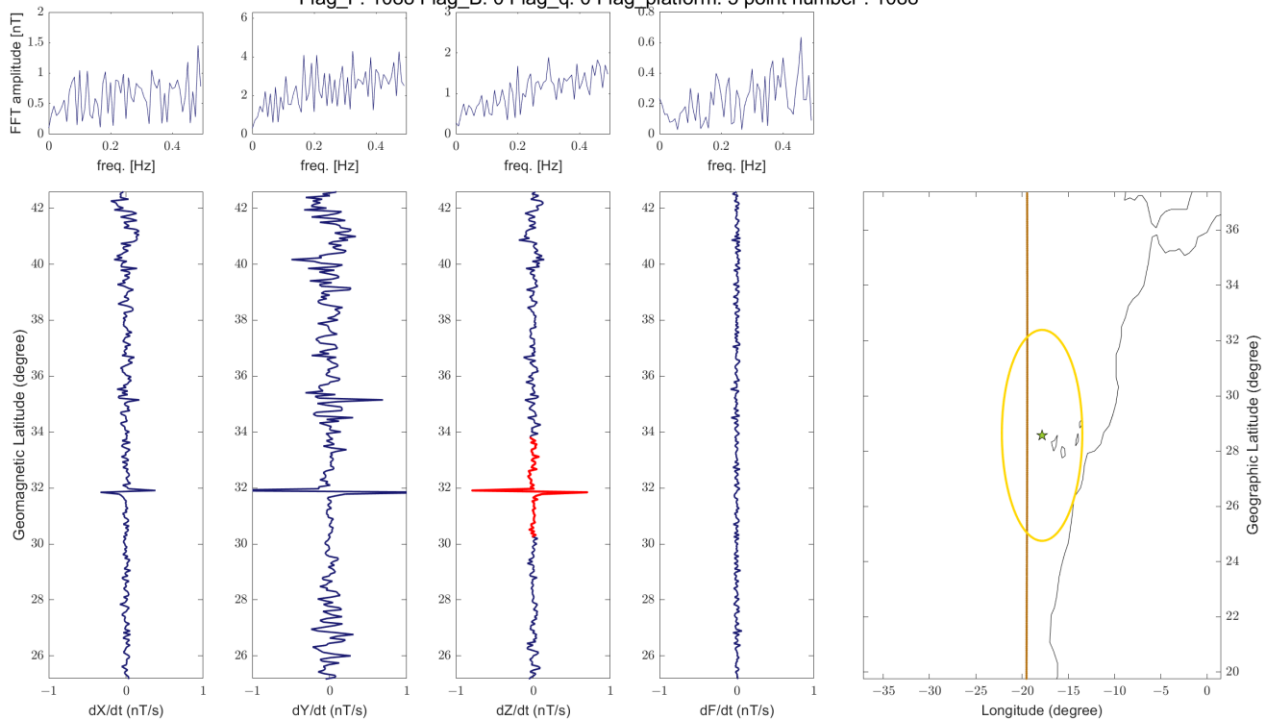

SAT.:A.Y/M/D:2021/6/3. Track n.:28 D.meanLT:19:15:4,meanUTC:20:33:54, Dst=-1nT, ap=3nTS=-1  
 Flag\_F: 56 Flag\_B: 0 Flag\_q: 0 Flag\_platform: 32 point number : 1088

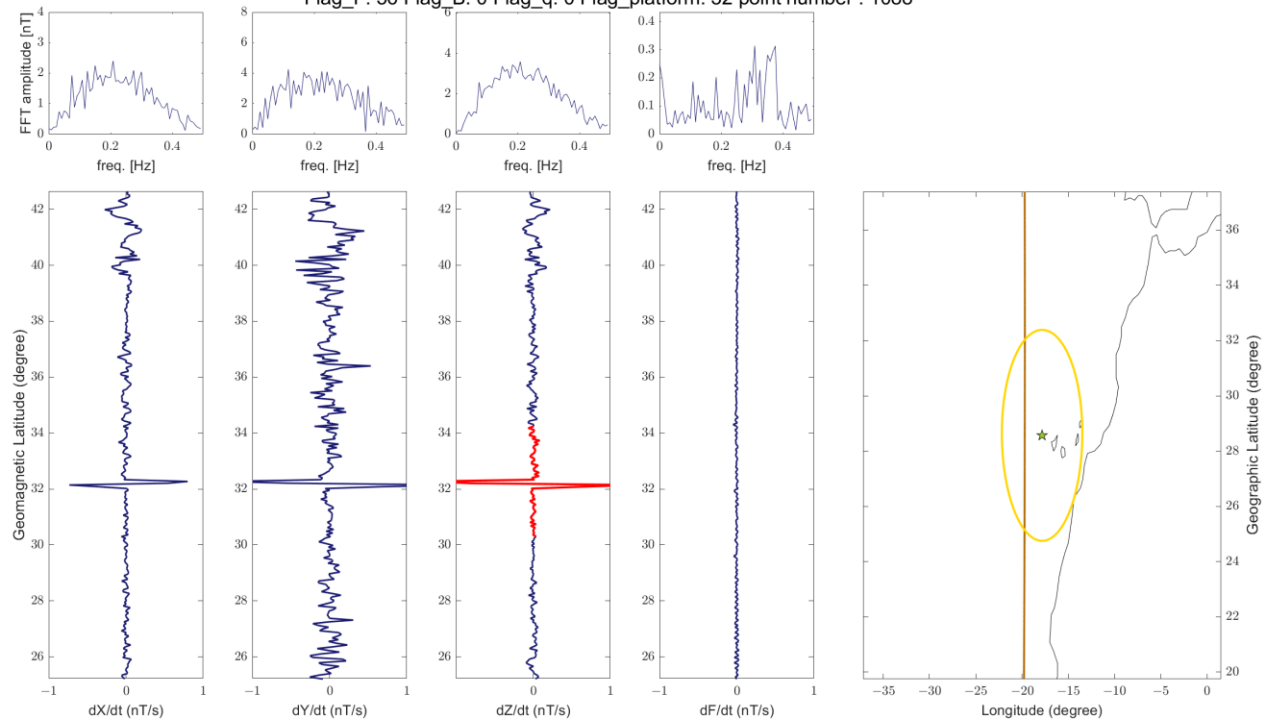

SAT.:B.Y/M/D:2021/6/6. Track n.:11 D.meanLT:6:31:18,meanUTC:7:34:18, Dst=0nT, ap=3nTS=-1

Flag\_F: 1105 Flag\_B: 0 Flag\_q: 0 Flag\_platform: 10 point number : 1105

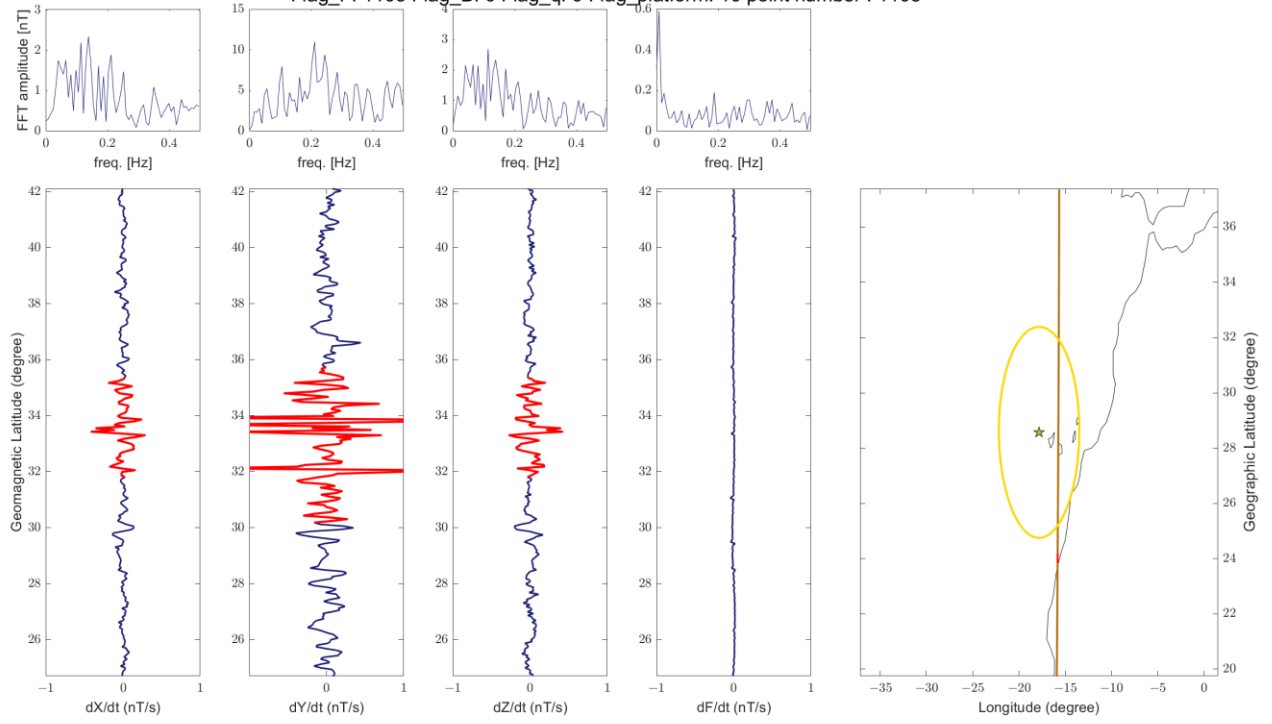

SAT.:C.Y/M/D:2021/6/9. Track n.:11 U.meanLT:6:57:58,meanUTC:8:6:44, Dst=-1nT, ap=4nTS=-1

Flag\_F: 1088 Flag\_B: 0 Flag\_q: 0 Flag\_platform: 10 point number : 1088

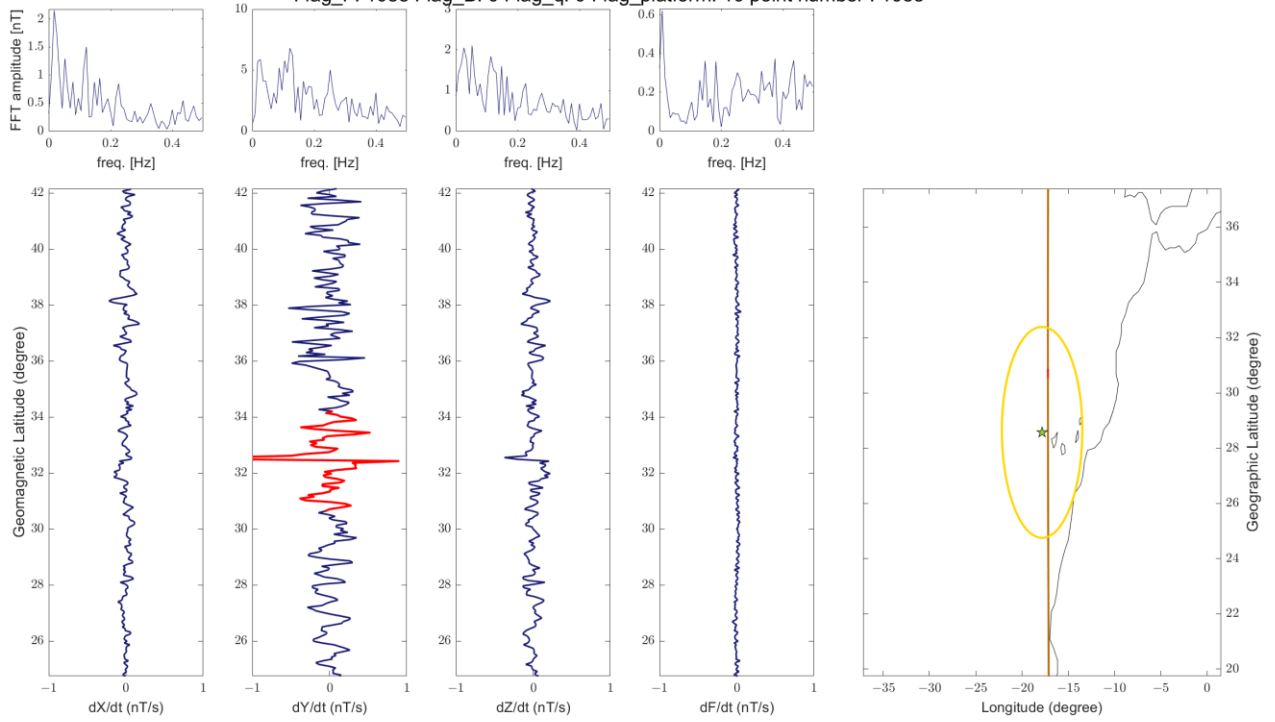

SAT.:A.Y/M/D:2021/6/9. Track n.:11 U.meanLT:6:57:0,meanUTC:8:6:51, Dst=-1nT, ap=4nTS=-1

Flag\_F: 1088 Flag\_B: 0 Flag\_q: 0 Flag\_platform: 10 point number : 1088

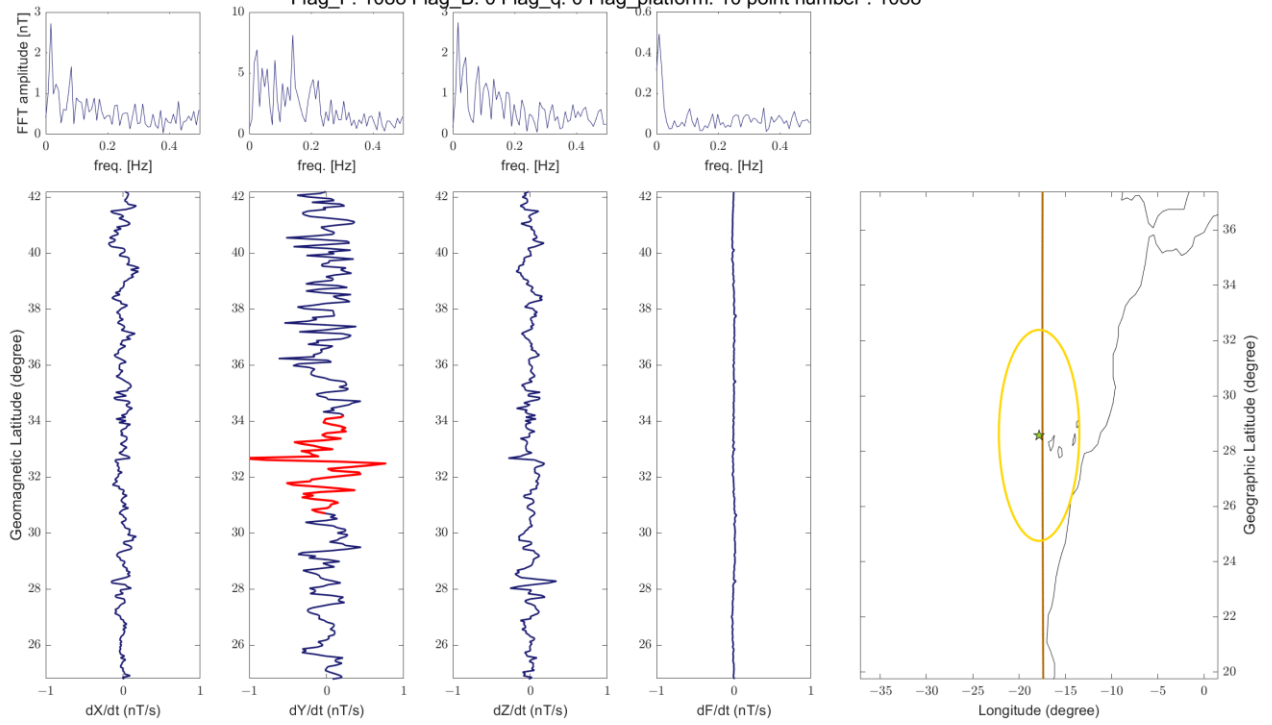

SAT.:C.Y/M/D:2021/6/17. Track n.:11 U.meanLT:6:14:52,meanUTC:7:14:3, Dst=-16nT, ap=7nTS=-1

Flag\_F: 1088 Flag\_B: 0 Flag\_q: 0 Flag\_platform: 19 point number : 1088

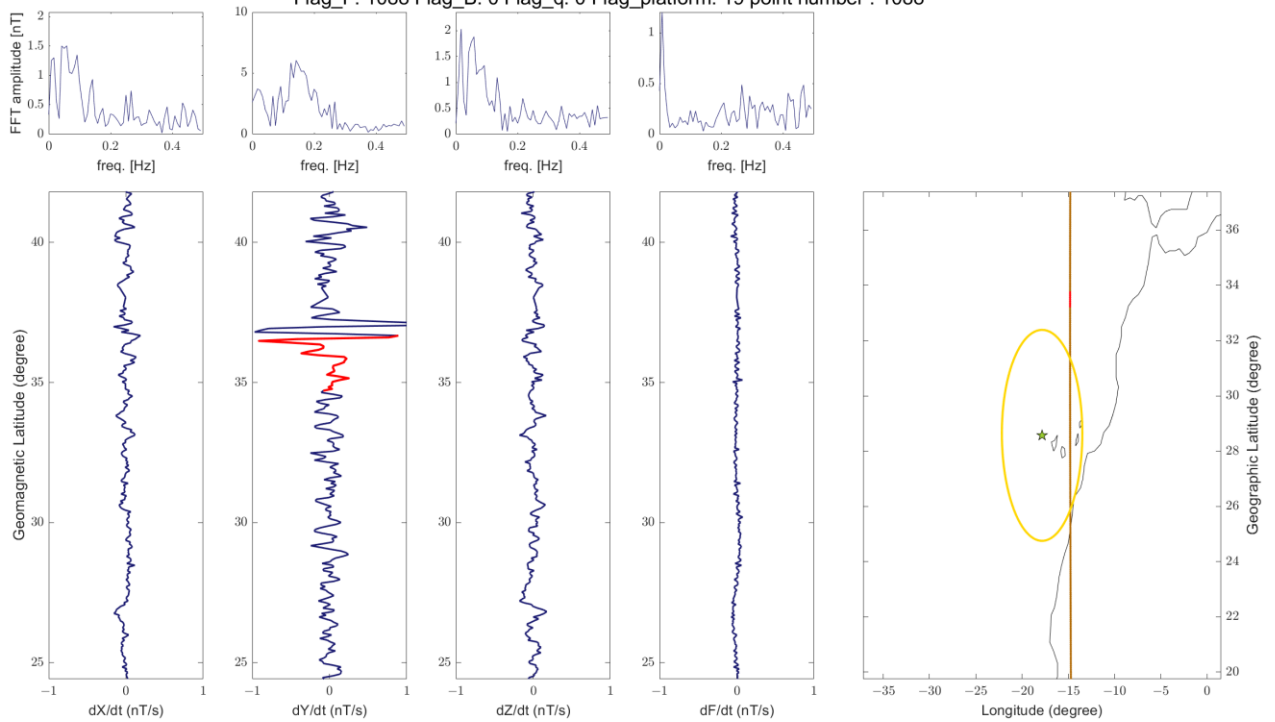

SAT.:A.Y/M/D:2021/6/17. Track n.:10 U.meanLT:6:13:59,meanUTC:7:14:9, Dst=-16nT, ap=7nTS=-1  
Flag\_F: 1088 Flag\_B: 0 Flag\_q: 0 Flag\_platform: 5 point number : 1088

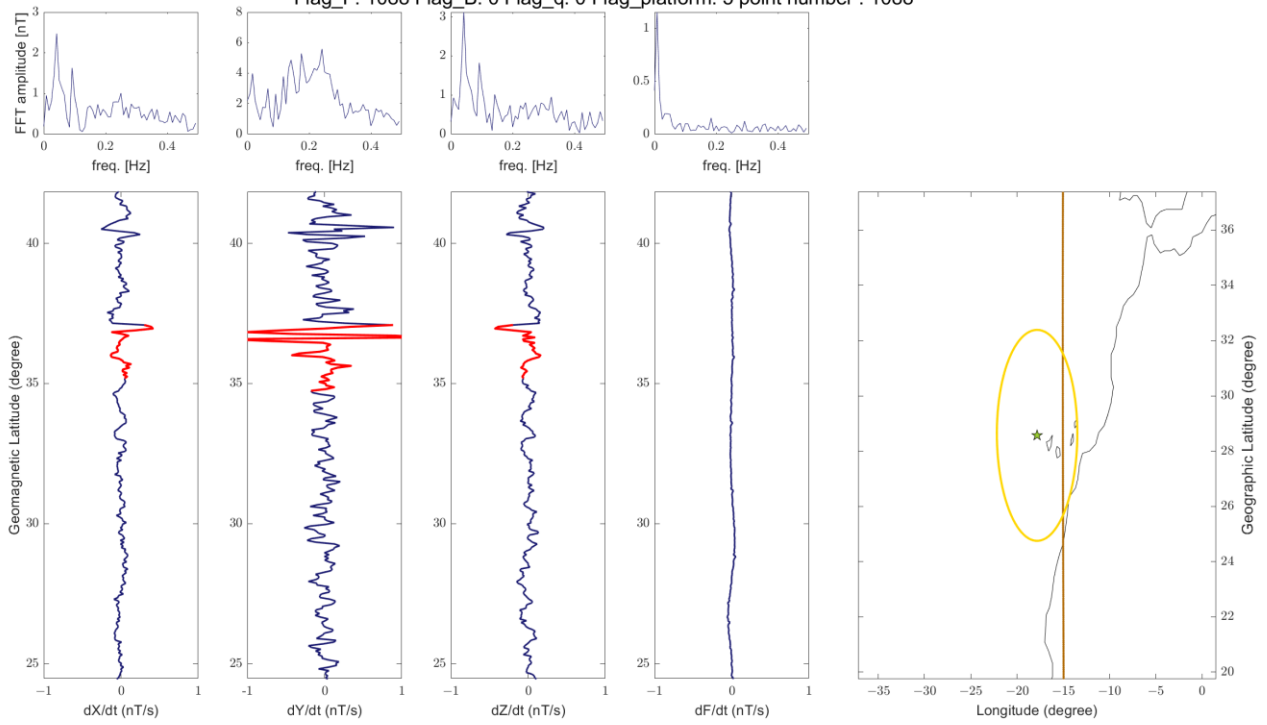

SAT.:B.Y/M/D:2021/6/18. Track n.:25 U.meanLT:17:37:2,meanUTC:18:50:29, Dst=-10nT, ap=5nTS=-1  
Flag\_F: 56 Flag\_B: 0 Flag\_q: 0 Flag\_platform: 15 point number : 1105

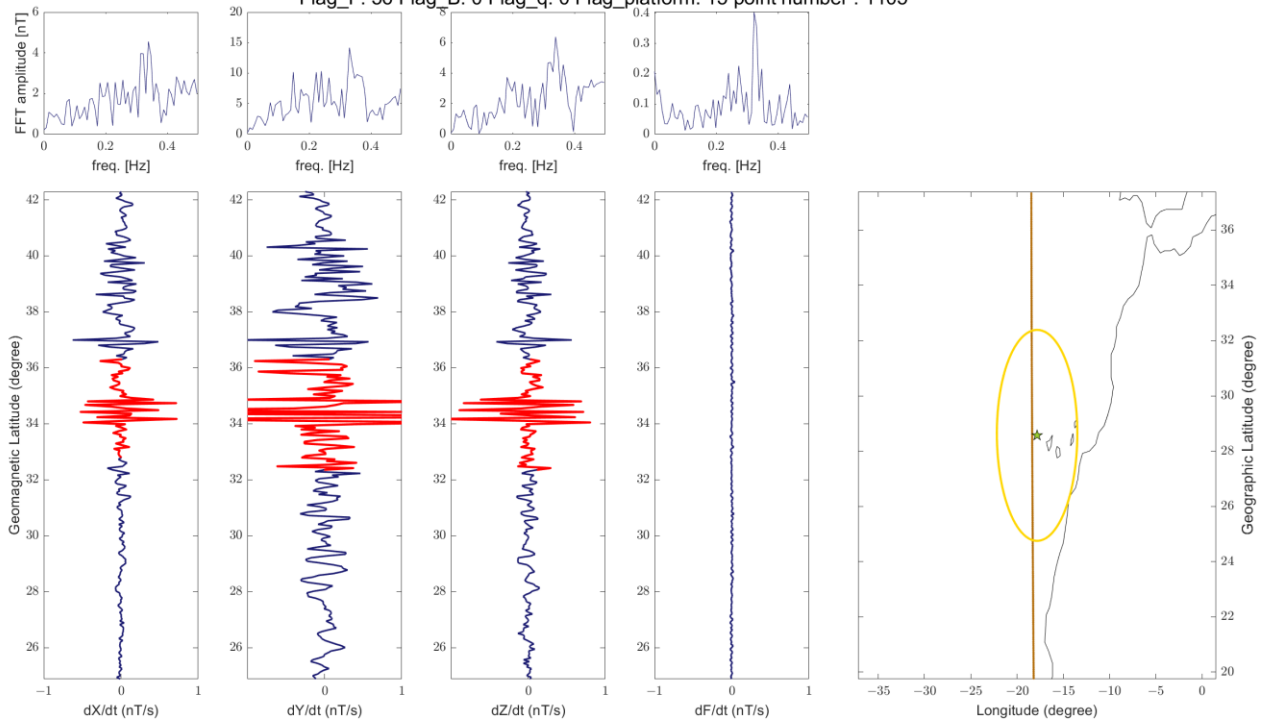

SAT.:B.Y/M/D:2021/6/19. Track n.:9 D.meanLT:5:24:45,meanUTC:6:25:27, Dst=-7nT, ap=4nTS=-1  
Flag\_F: 64 Flag\_B: 0 Flag\_q: 0 Flag\_platform: 25 point number : 1104

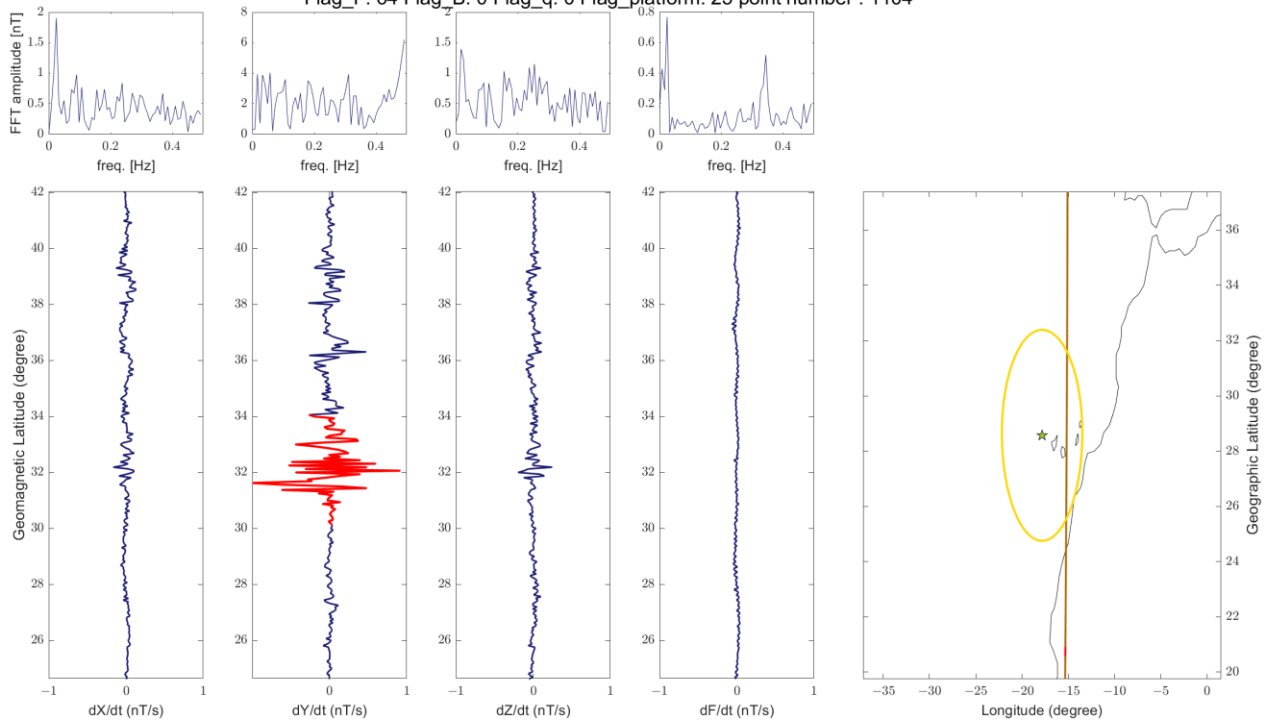

SAT.:A.Y/M/D:2021/6/19. Track n.:10 U.meanLT:6:3:9,meanUTC:7:24:15, Dst=-7nT, ap=4nTS=-1  
Flag\_F: 1088 Flag\_B: 0 Flag\_q: 0 Flag\_platform: 35 point number : 1088

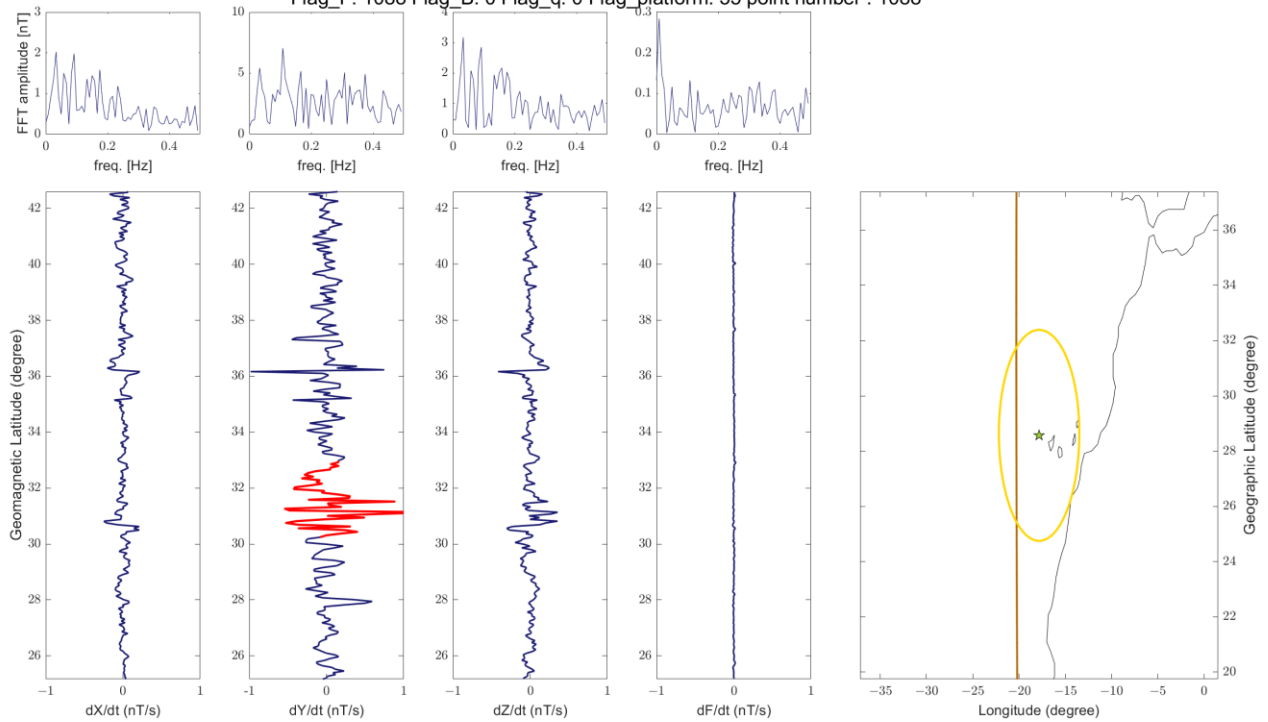

SAT.:C.Y/M/D:2021/6/19. Track n.:25 D.meanLT:17:49:51,meanUTC:18:48:29, Dst=-7nT, ap=2nTS=-1  
Flag\_F: 1088 Flag\_B: 0 Flag\_q: 0 Flag\_platform: 15 point number : 1088

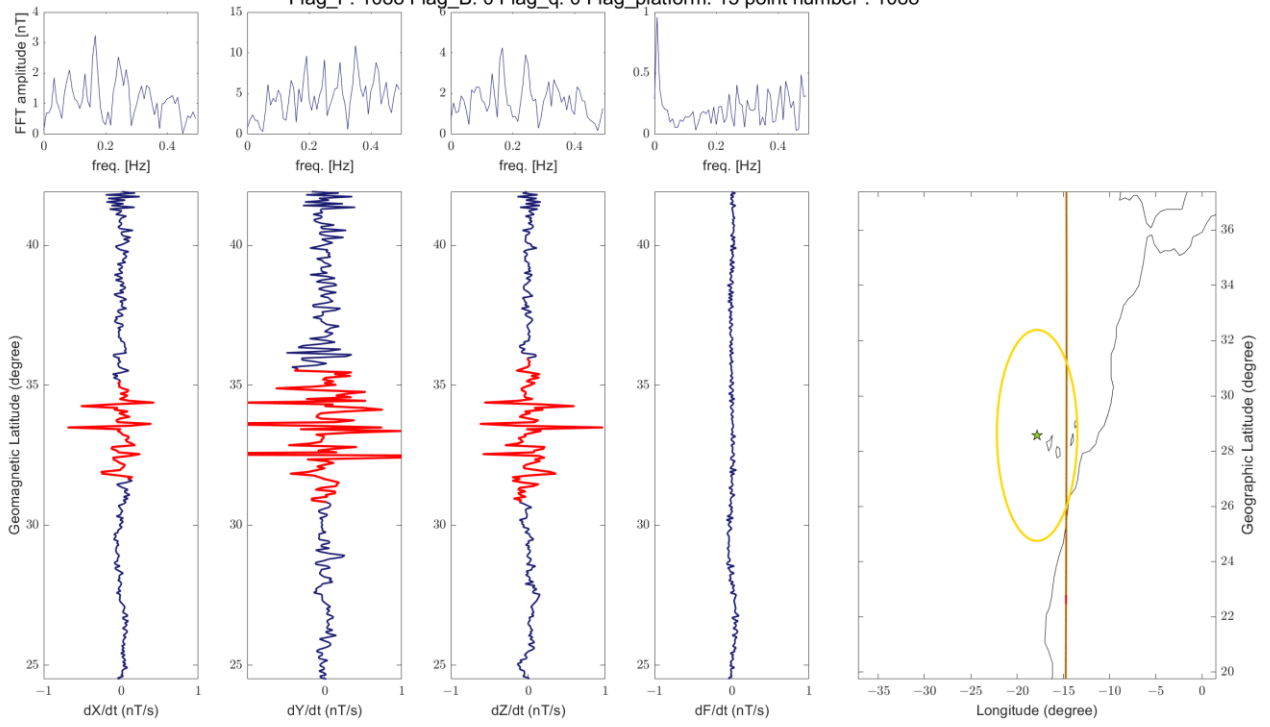

SAT.:A.Y/M/D:2021/6/19. Track n.:25 D.meanLT:17:49:3,meanUTC:18:48:35, Dst=-7nT, ap=2nTS=-1  
Flag\_F: 1088 Flag\_B: 0 Flag\_q: 0 Flag\_platform: 10 point number : 1088

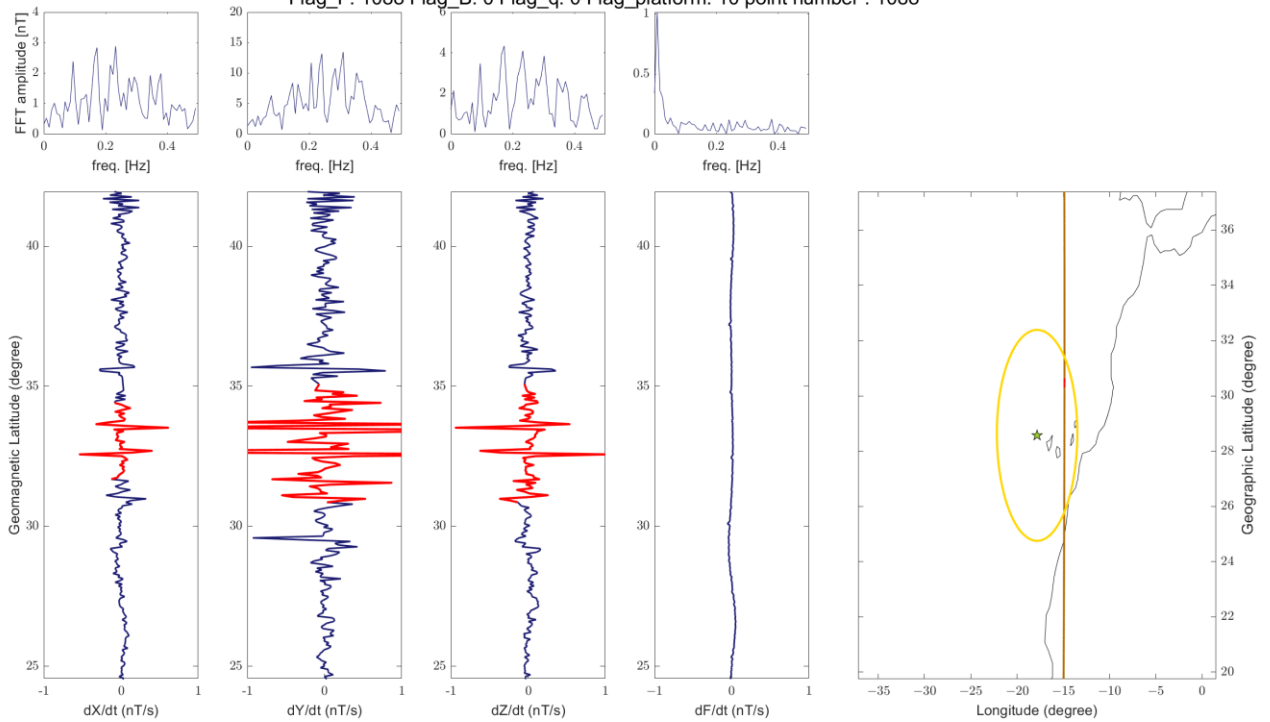

SAT.:A.Y/M/D:2021/6/21. Track n.:25 D.meanLT:17:38:12,meanUTC:18:58:40, Dst=5nT, ap=5nTS=-1  
Flag\_F: 1089 Flag\_B: 0 Flag\_q: 0 Flag\_platform: 20 point number : 1089

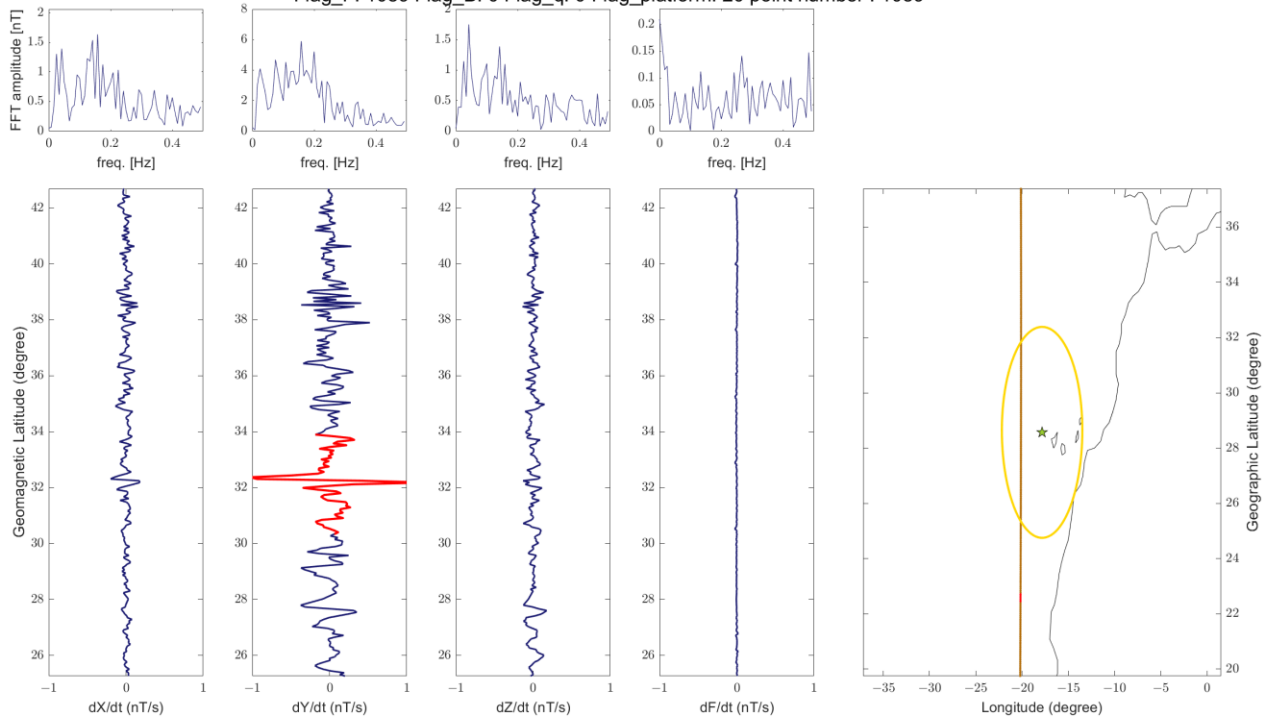

SAT.:C.Y/M/D:2021/6/21. Track n.:25 D.meanLT:17:38:59,meanUTC:18:58:34, Dst=5nT, ap=5nTS=-1  
Flag\_F: 1088 Flag\_B: 0 Flag\_q: 0 Flag\_platform: 5 point number : 1088

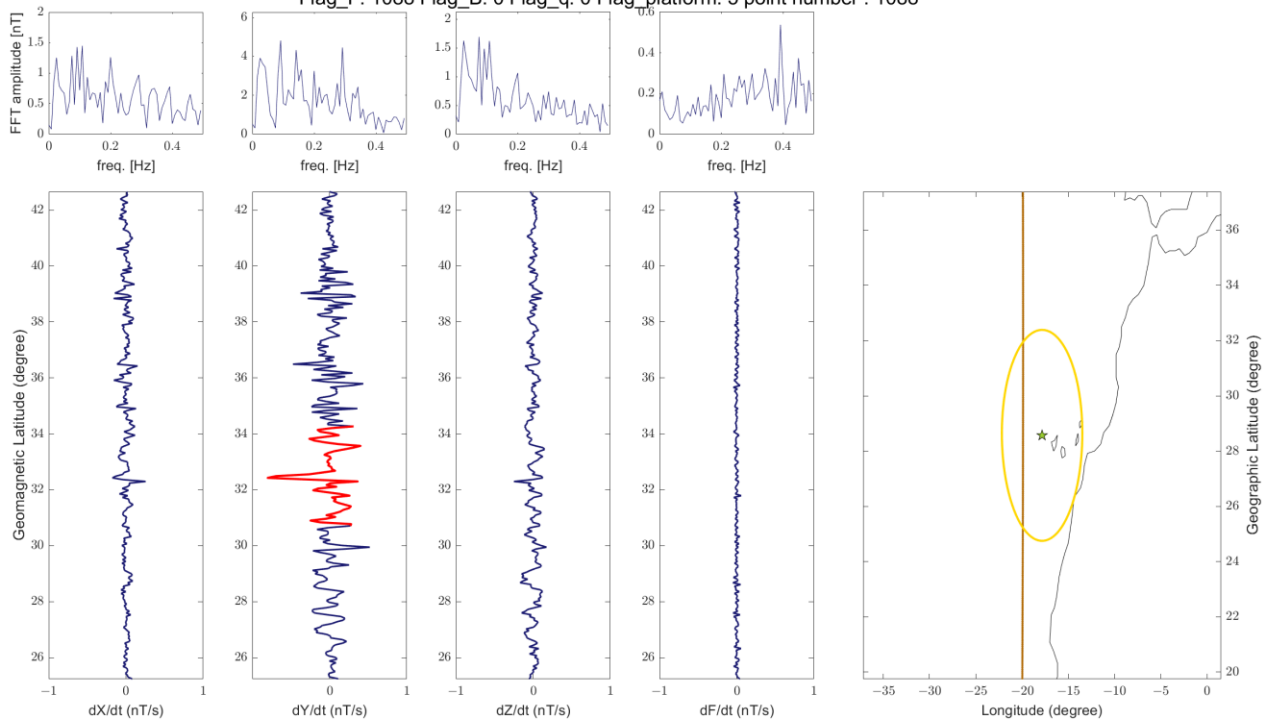

SAT.:C.Y/M/D:2021/6/22. Track n.:10 U.meanLT:5:47:54,meanUTC:6:52:40, Dst=-10nT, ap=5nTS=-1  
Flag\_F: 1088 Flag\_B: 0 Flag\_q: 0 Flag\_platform: 10 point number : 1088

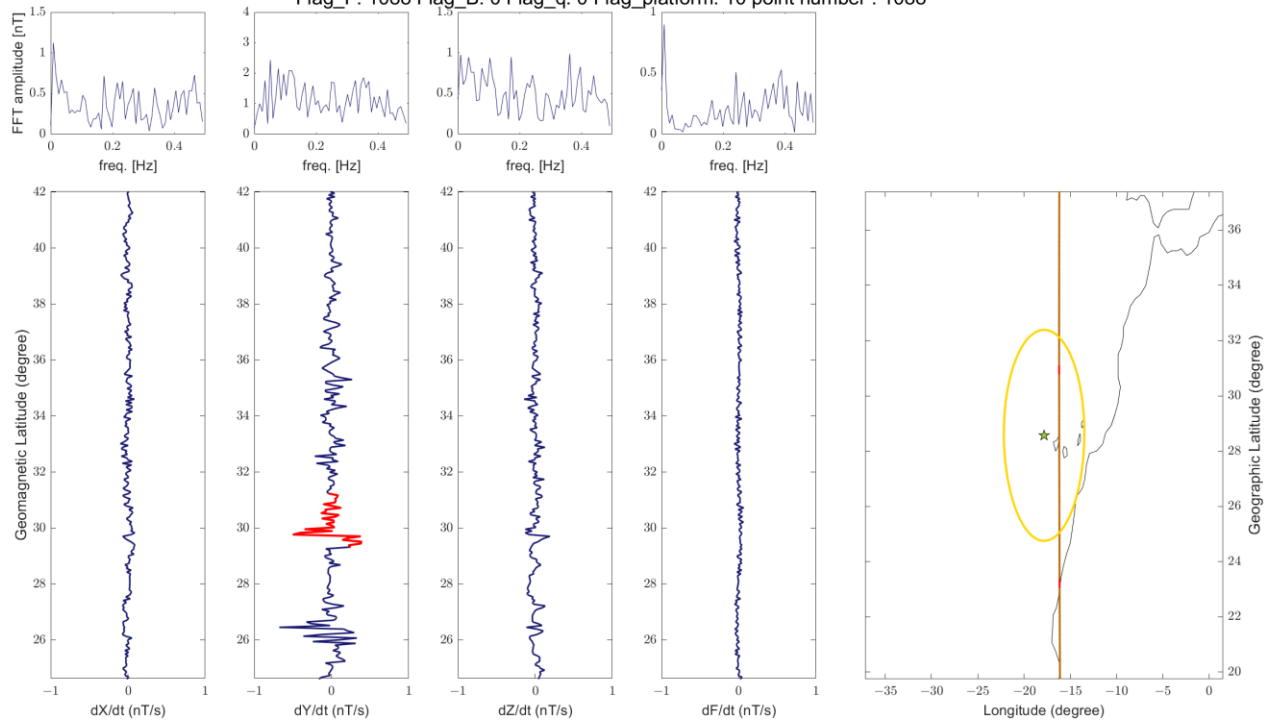

SAT.:B.Y/M/D:2021/6/24. Track n.:9 D.meanLT:4:59:4,meanUTC:6:20:47, Dst=6nT, ap=4nTS=-1  
Flag\_F: 1104 Flag\_B: 0 Flag\_q: 0 Flag\_platform: 15 point number : 1104

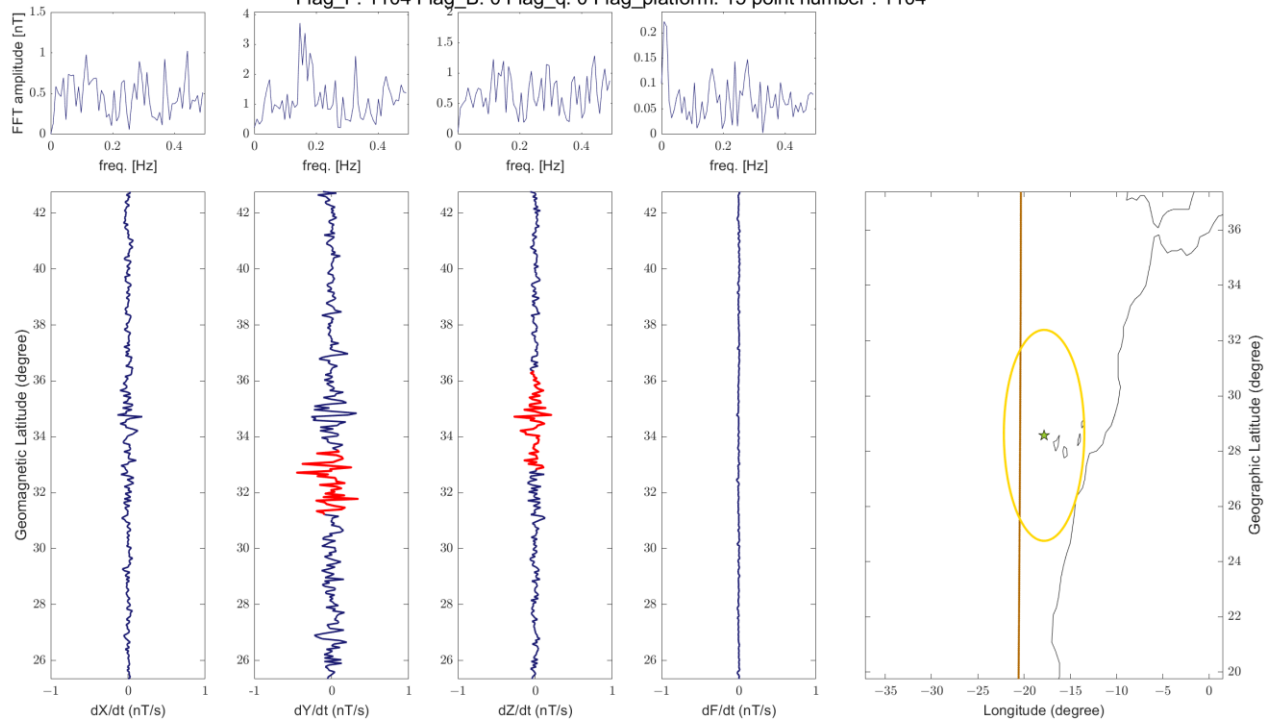

SAT.:A.Y/M/D:2021/6/24. Track n.:10 U.meanLT:5:36:13,meanUTC:7:2:51, Dst=6nT, ap=4nTS=-1

Flag\_F: 1088 Flag\_B: 0 Flag\_q: 0 Flag\_platform: 25 point number : 1088

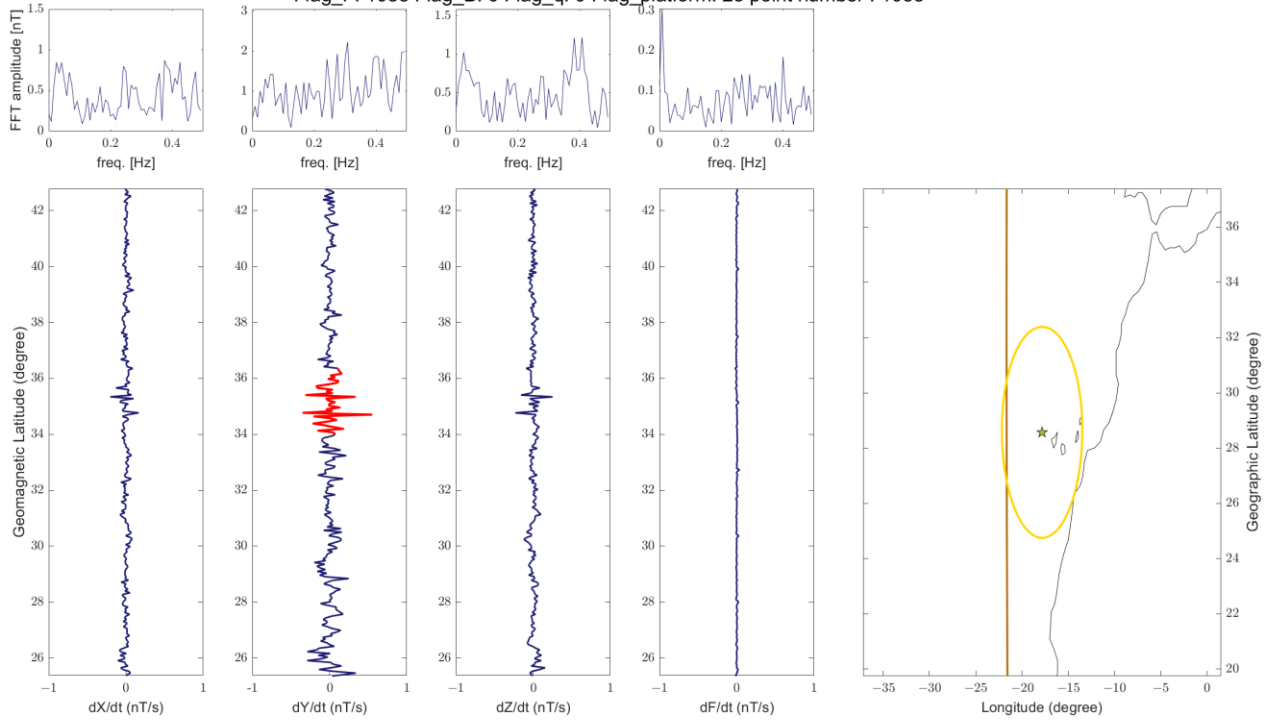

SAT.:B.Y/M/D:2021/6/25. Track n.:24 U.meanLT:17:1:14,meanUTC:18:6:5, Dst=-3nT, ap=4nTS=-1

Flag\_F: 1105 Flag\_B: 0 Flag\_q: 0 Flag\_platform: 20 point number : 1105

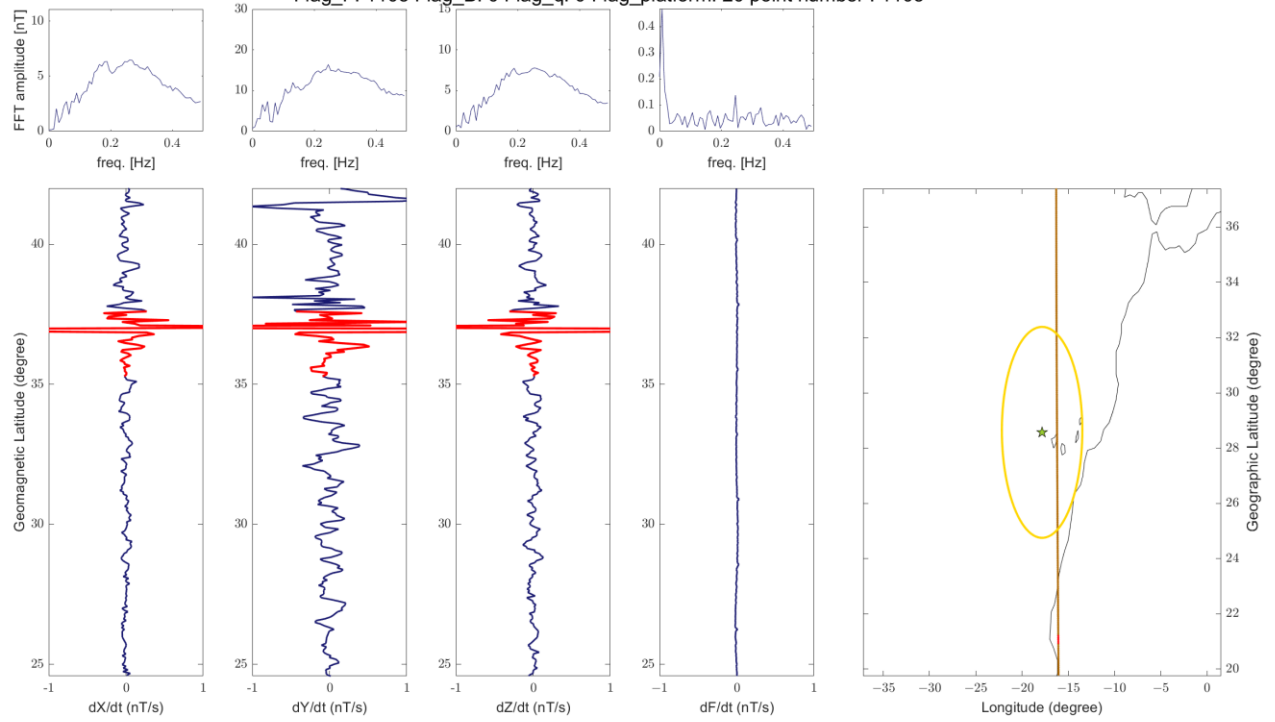

SAT.:C.Y/M/D:2021/6/29. Track n.:24 D.meanLT:16:55:55,meanUTC:18:5:37, Dst=8nT, ap=7nTS=-1

Flag\_F: 1088 Flag\_B: 0 Flag\_q: 0 Flag\_platform: 20 point number : 1088

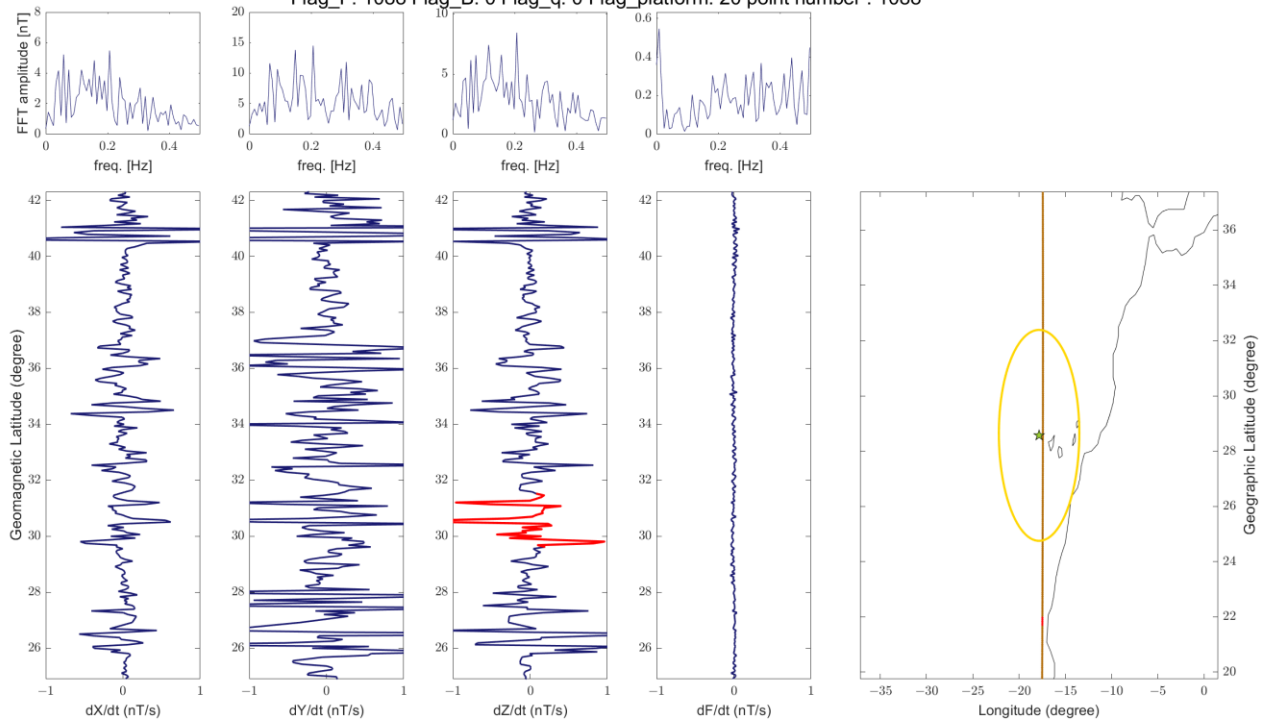

SAT.:B.Y/M/D:2021/7/1. Track n.:8 D.meanLT:4:23:16,meanUTC:5:36:20, Dst=-5nT, ap=9nTS=-1

Flag\_F: 1105 Flag\_B: 0 Flag\_q: 0 Flag\_platform: 10 point number : 1105

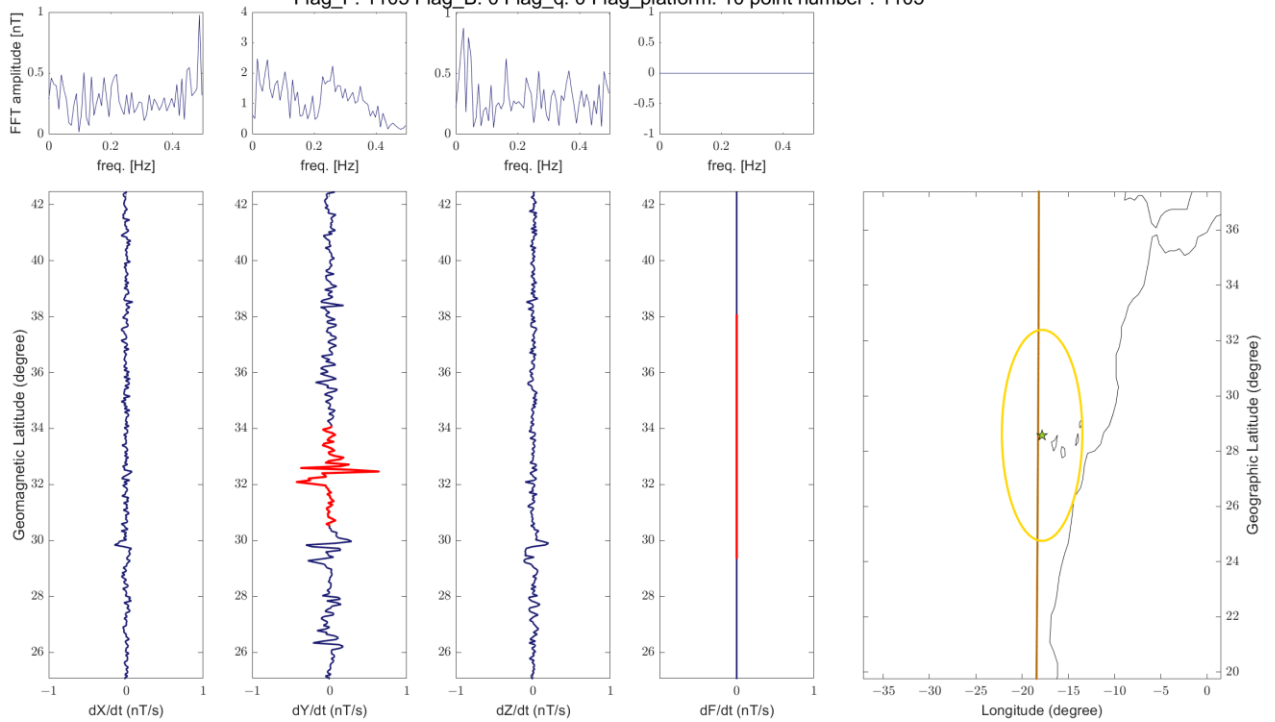

SAT.:C.Y/M/D:2021/7/5. Track n.:8 U.meanLT:4:37:51,meanUTC:5:38:8, Dst=15nT, ap=5nTS=-1  
 Flag\_F: 1088 Flag\_B: 0 Flag\_q: 0 Flag\_platform: 5 point number : 1088

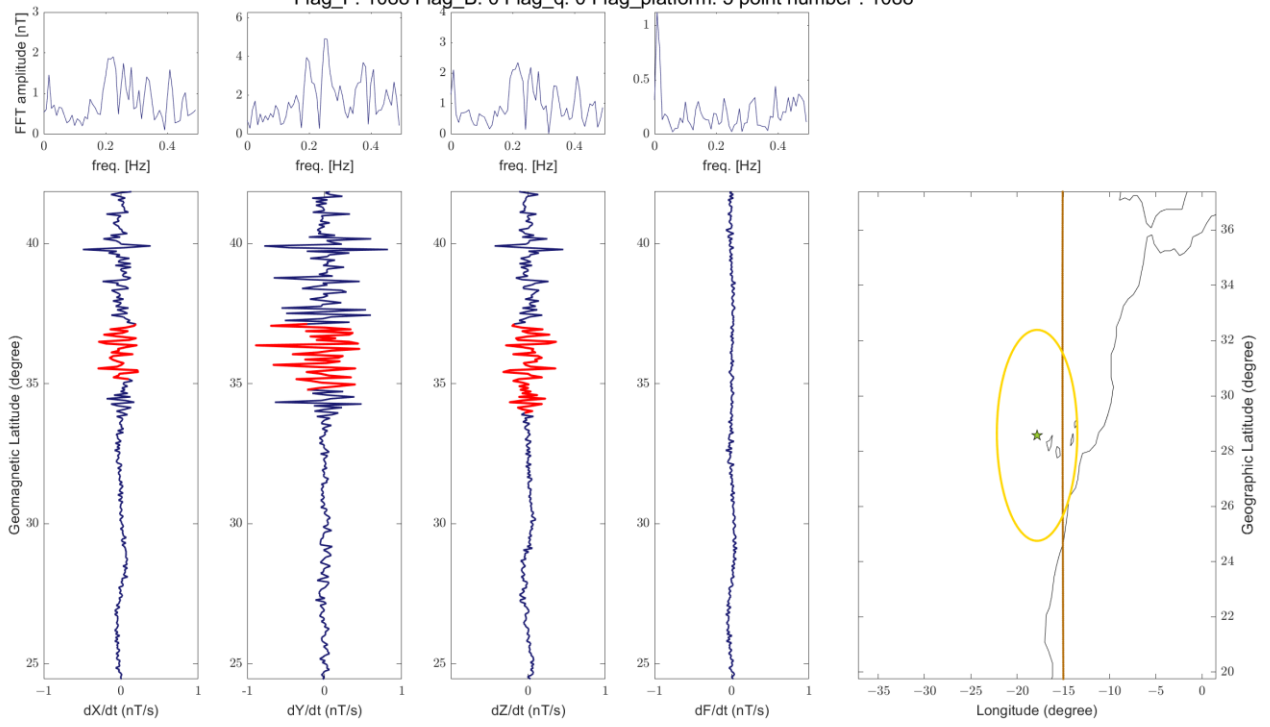

SAT.:A.Y/M/D:2021/7/5. Track n.:8 U.meanLT:4:37:6,meanUTC:5:38:13, Dst=15nT, ap=5nTS=-1  
 Flag\_F: 1088 Flag\_B: 0 Flag\_q: 0 Flag\_platform: 15 point number : 1088

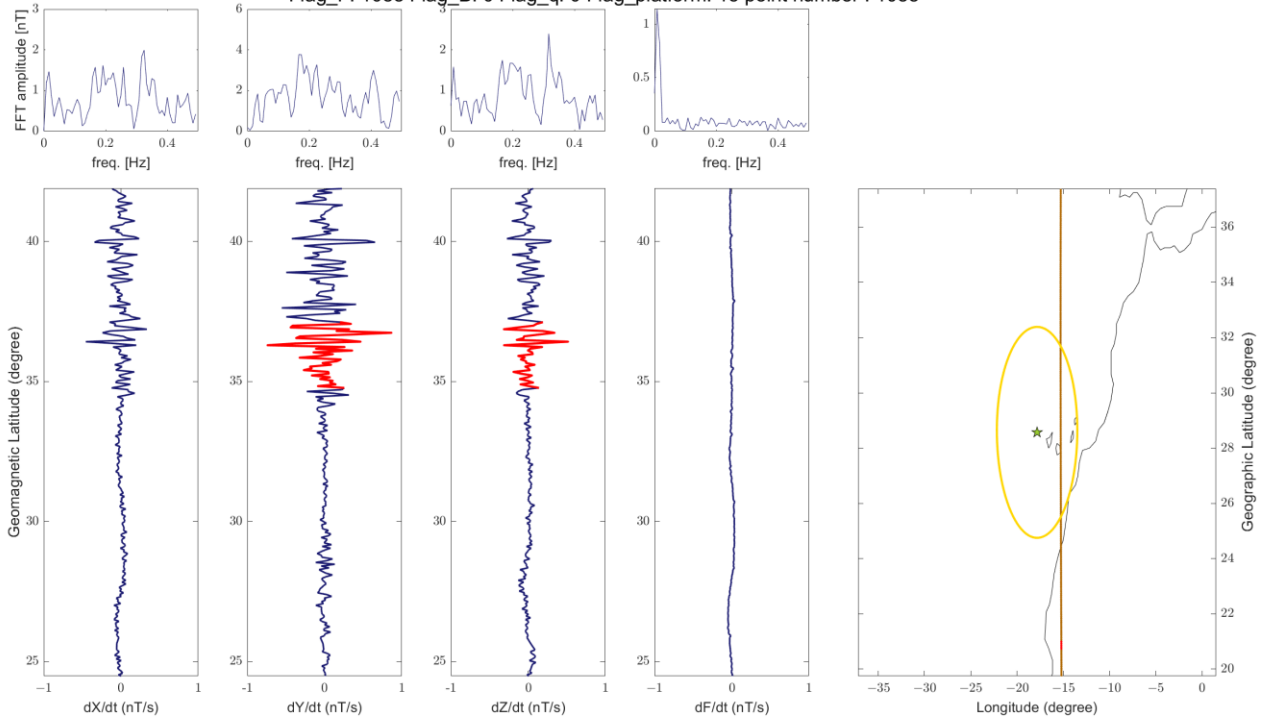

SAT.:C.Y/M/D:2021/7/7. Track n.:8 U.meanLT:4:26:60,meanUTC:5:48:8, Dst=-6nT, ap=5nTS=-1  
Flag\_F: 1088 Flag\_B: 0 Flag\_q: 0 Flag\_platform: 15 point number : 1088

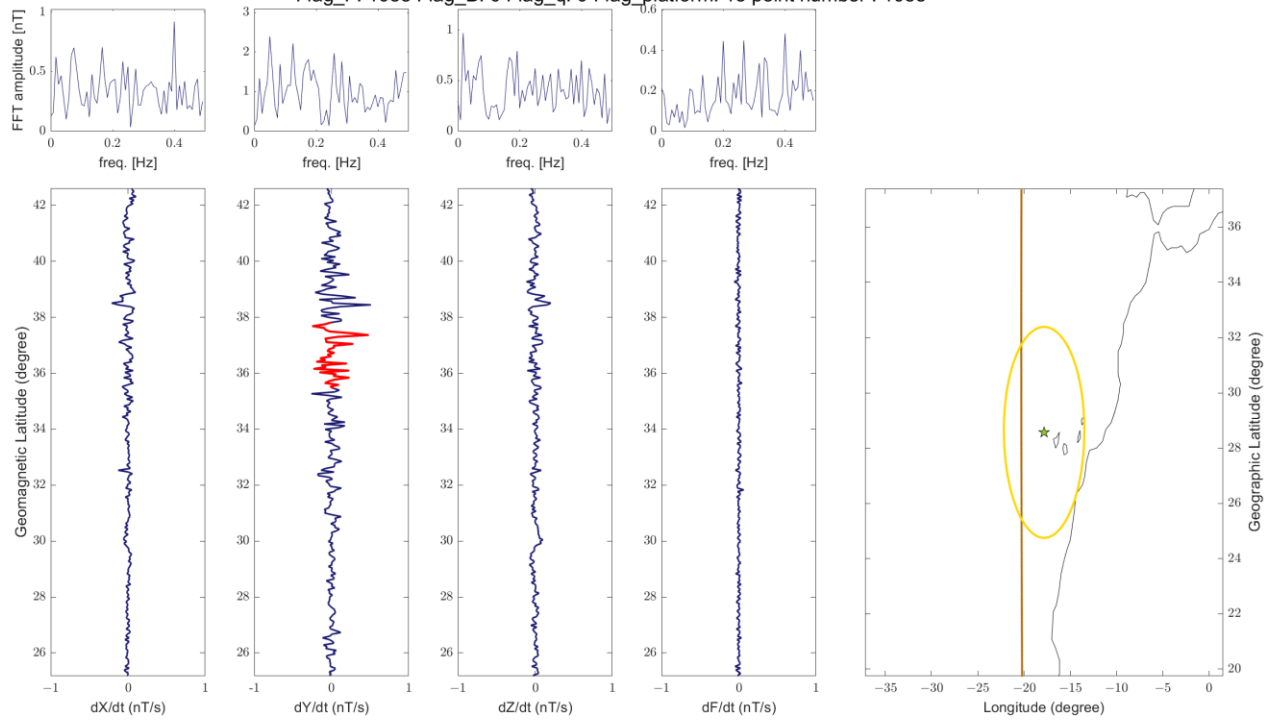

SAT.:A.Y/M/D:2021/7/7. Track n.:8 U.meanLT:4:26:16,meanUTC:5:48:13, Dst=-6nT, ap=5nTS=-1  
Flag\_F: 1088 Flag\_B: 0 Flag\_q: 0 Flag\_platform: 10 point number : 1088

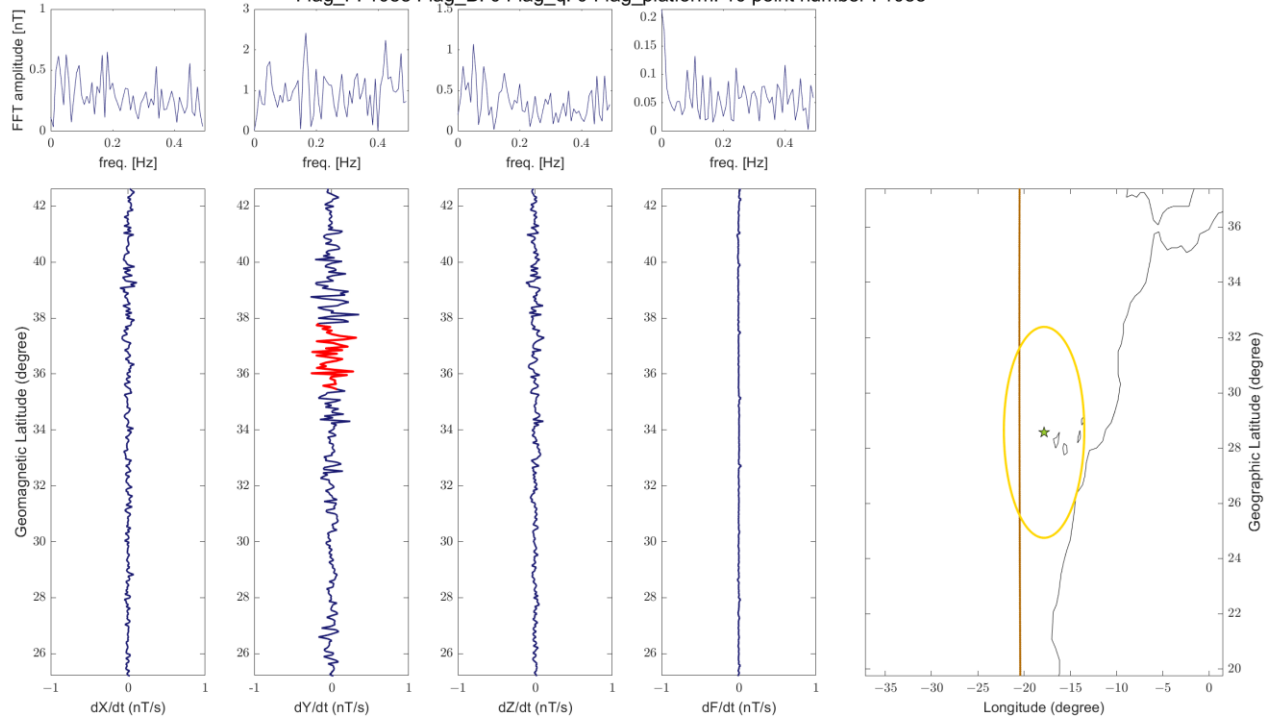

SAT.:C.Y/M/D:2021/7/12. Track n.:8 U.meanLT:4:0:1,meanUTC:5:26:28, Dst=13nT, ap=2nTS=-1  
Flag\_F: 1088 Flag\_B: 0 Flag\_q: 0 Flag\_platform: 10 point number : 1088

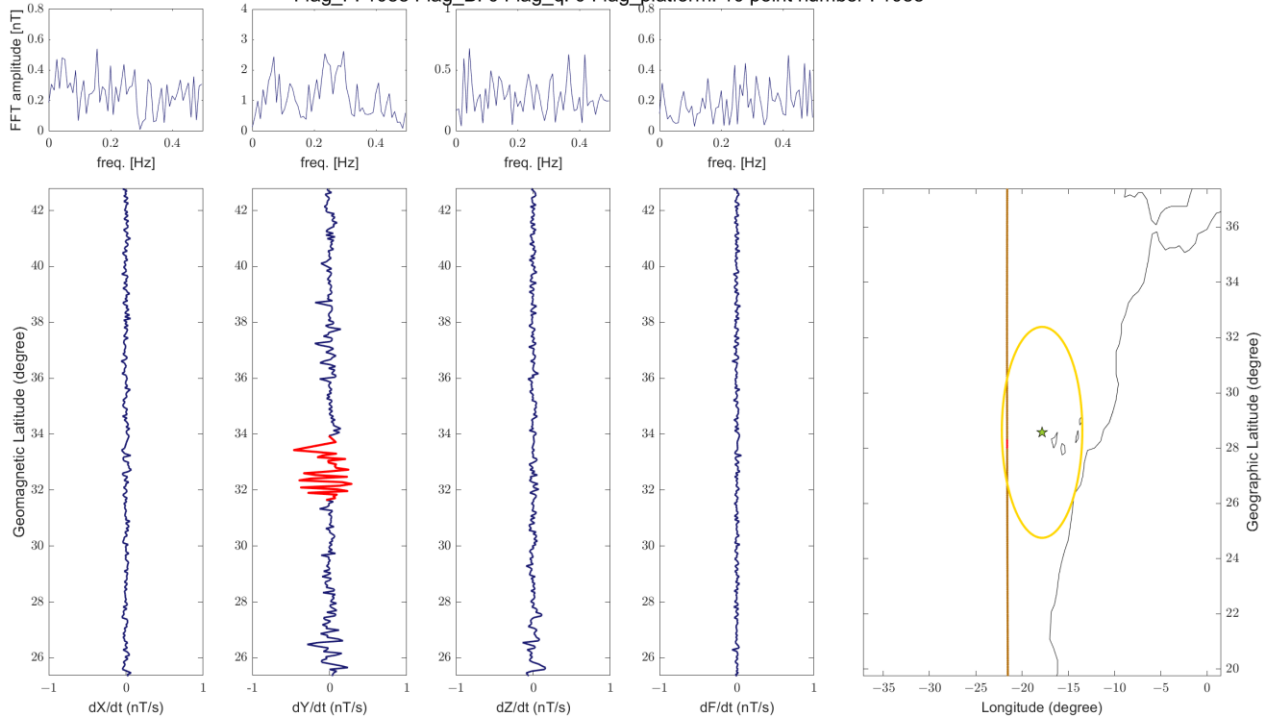

SAT.:C.Y/M/D:2021/7/15. Track n.:7 U.meanLT:3:43:55,meanUTC:4:54:47, Dst=-17nT, ap=7nTS=-1  
Flag\_F: 1089 Flag\_B: 0 Flag\_q: 0 Flag\_platform: 10 point number : 1089

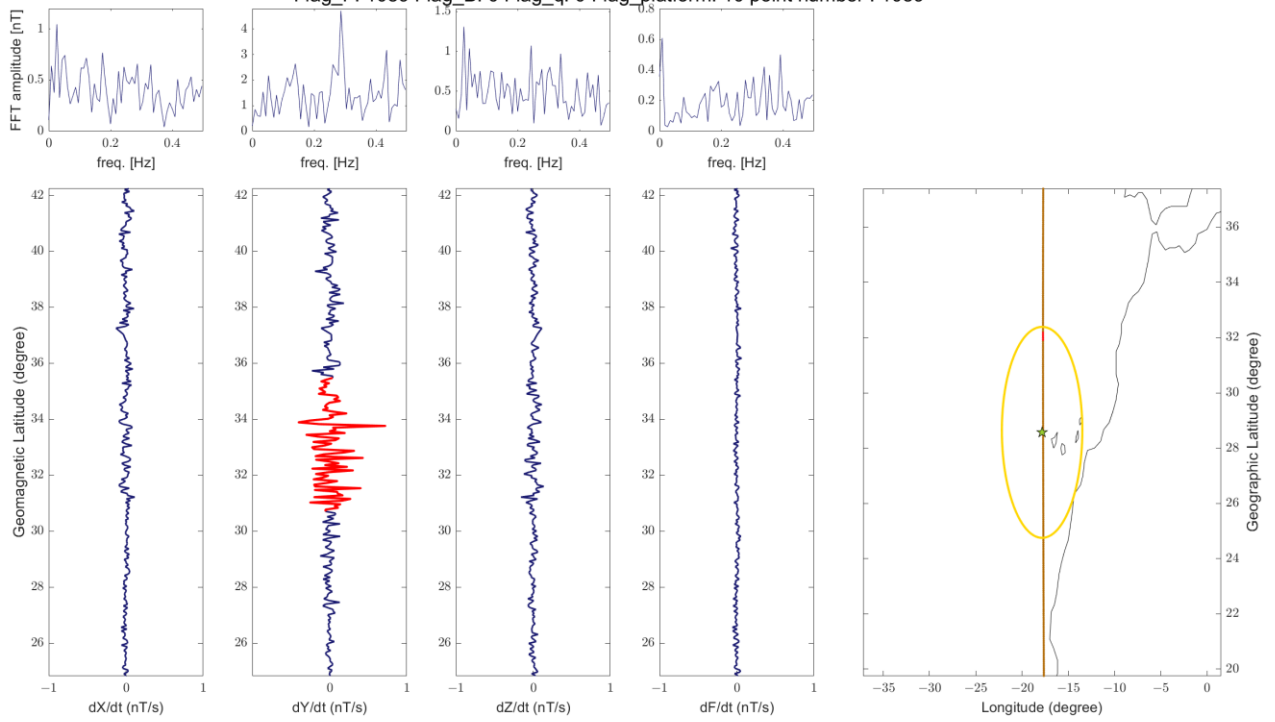

SAT.:A.Y/M/D:2021/7/15. Track n.:7 U.meanLT:3:43:15,meanUTC:4:54:51, Dst=-17nT, ap=7nTS=-1  
Flag\_F: 56 Flag\_B: 0 Flag\_q: 0 Flag\_platform: 10 point number : 1089

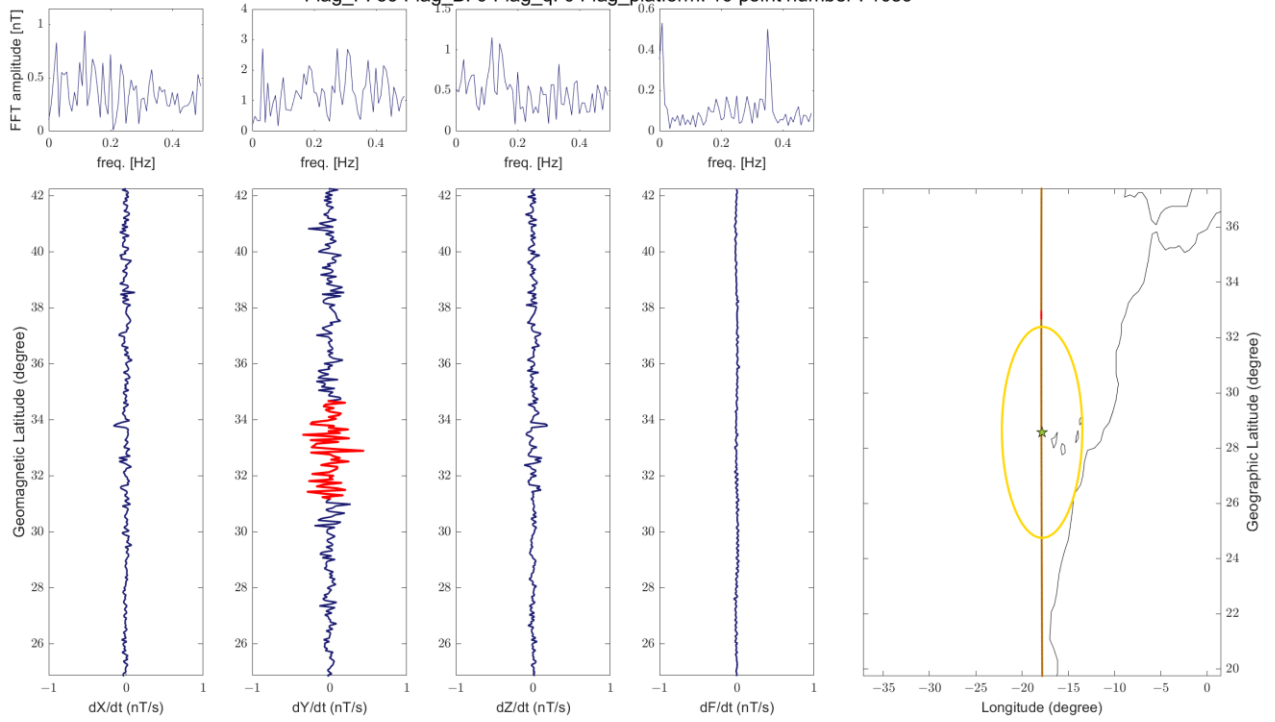

SAT.:C.Y/M/D:2021/7/17. Track n.:22 D.meanLT:15:18:54,meanUTC:16:29:2, Dst=3nT, ap=6nTS=-1  
Flag\_F: 1088 Flag\_B: 0 Flag\_q: 4 Flag\_platform: 10 point number : 1088

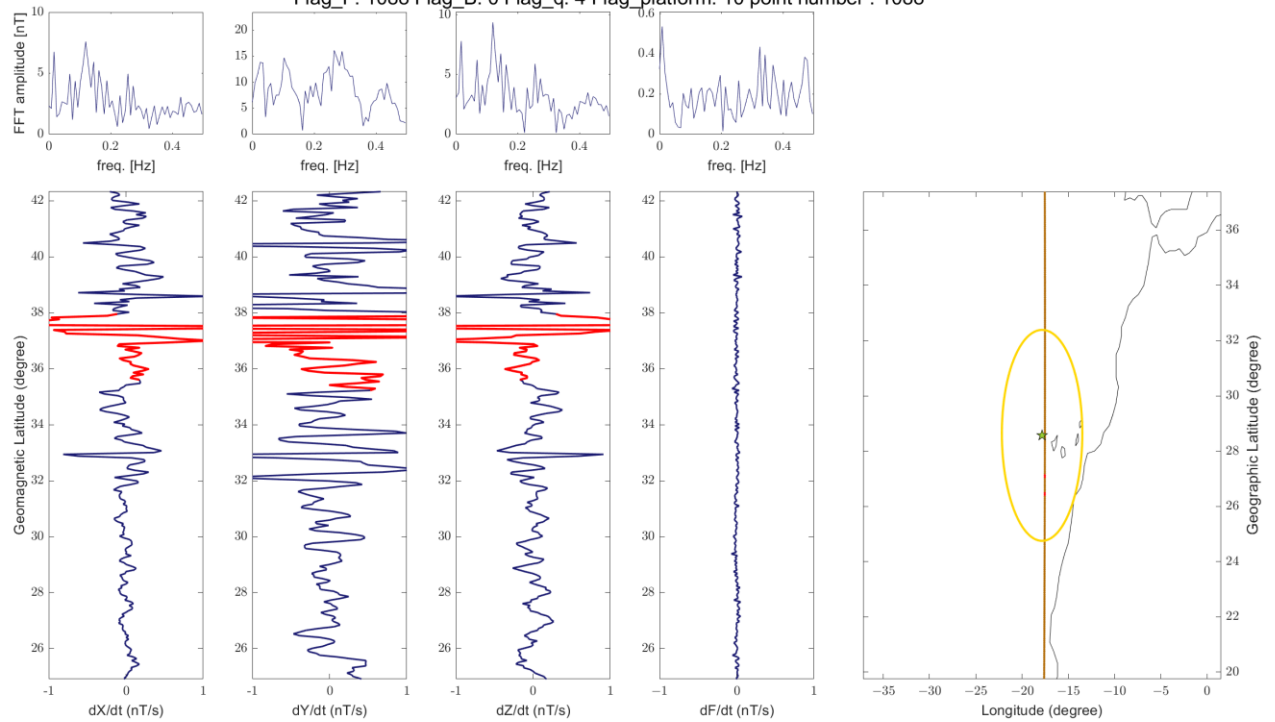

SAT.:A.Y/M/D:2021/7/17. Track n.:22 D.meanLT:15:18:20,meanUTC:16:29:6, Dst=3nT, ap=6nTS=-1

Flag\_F: 56 Flag\_B: 0 Flag\_q: 6 Flag\_platform: 5 point number : 1088

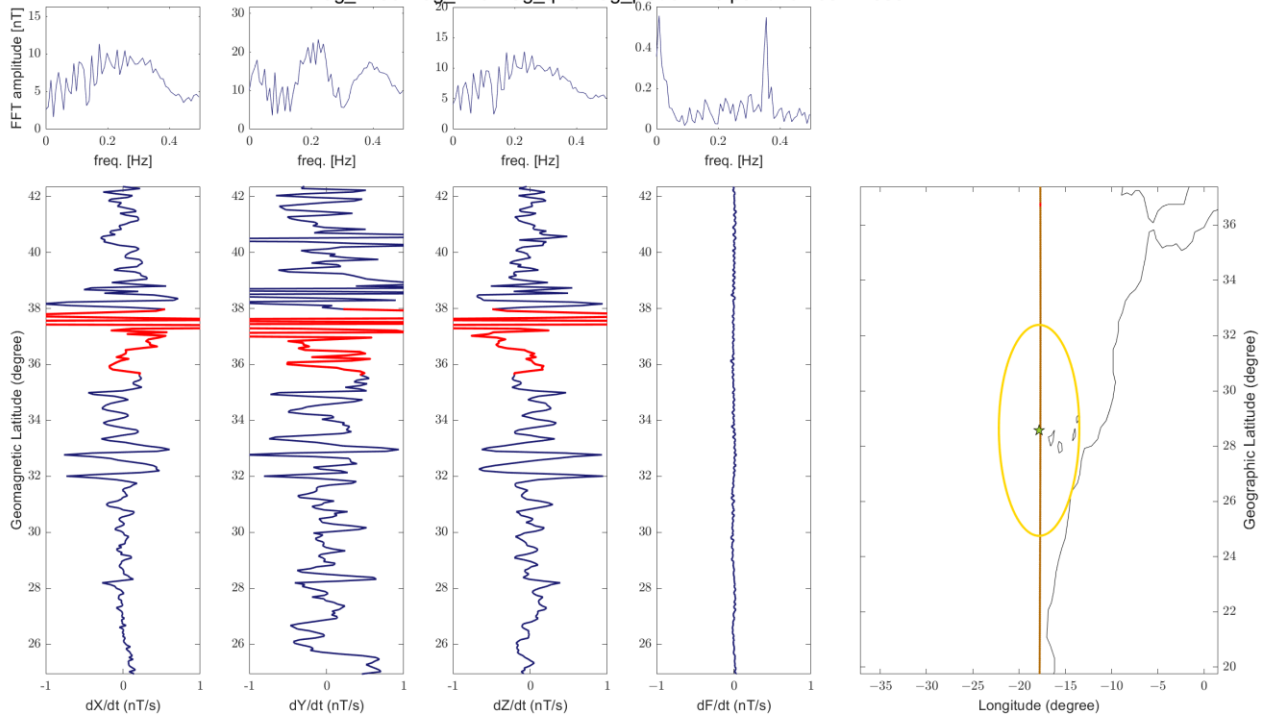

SAT.:C.Y/M/D:2021/7/20. Track n.:23 D.meanLT:15:2:48,meanUTC:15:57:19, Dst=15nT, ap=9nTS=-1

Flag\_F: 1088 Flag\_B: 0 Flag\_q: 0 Flag\_platform: 15 point number : 1088

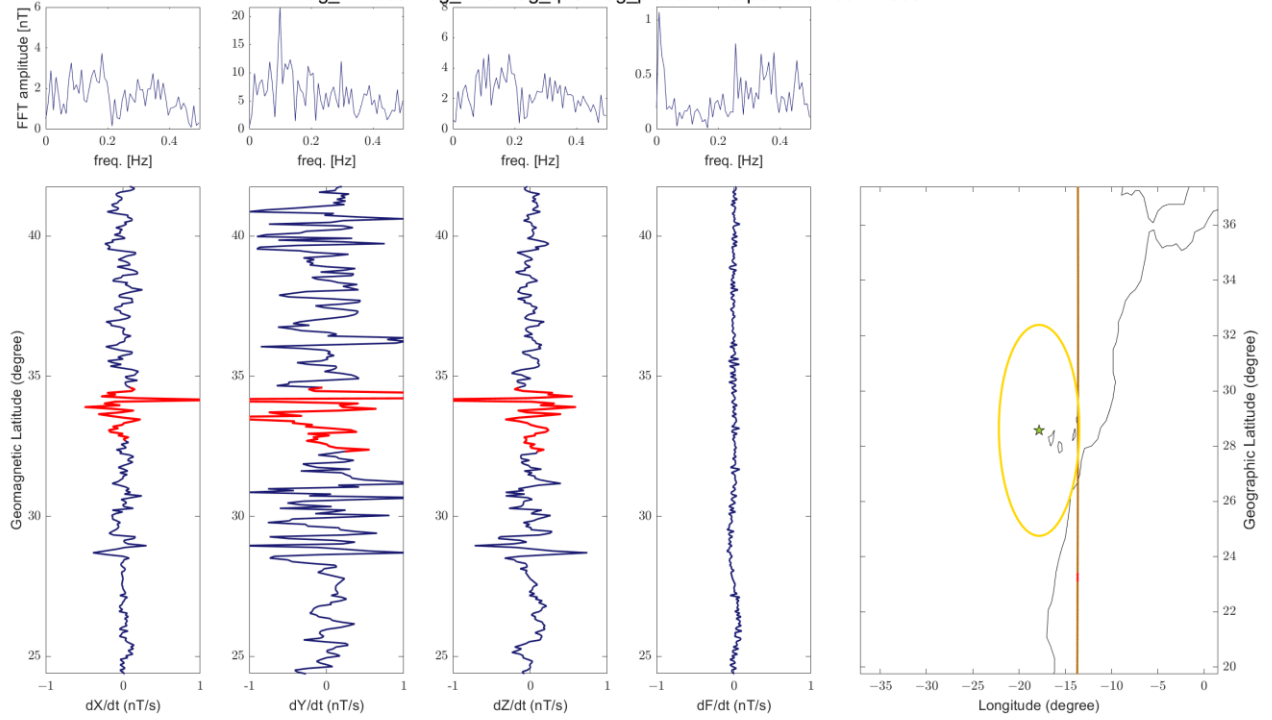

SAT.:A.Y/M/D:2021/7/20. Track n.:23 D.meanLT:15:2:14,meanUTC:15:57:22, Dst=15nT, ap=9nTS=-1  
Flag\_F: 1088 Flag\_B: 0 Flag\_q: 0 Flag\_platform: 5 point number : 1088

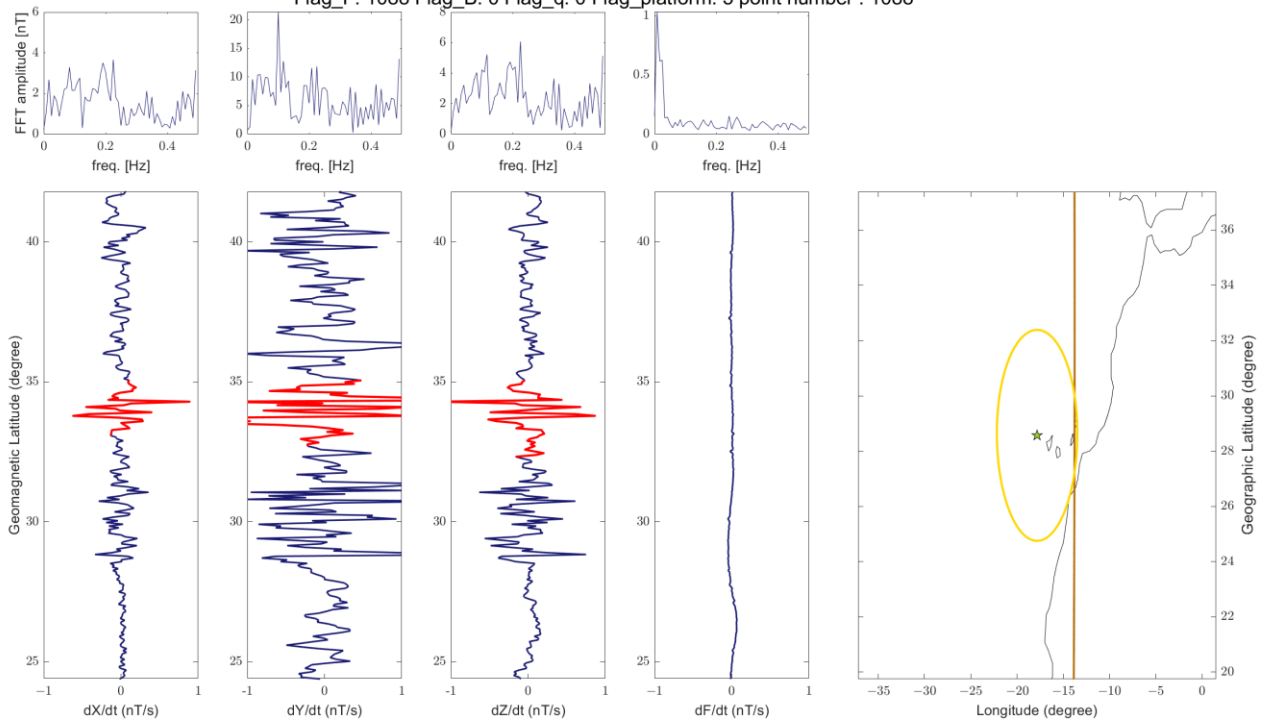

SAT.:B.Y/M/D:2021/7/21. Track n.:6 D.meanLT:2:40:54,meanUTC:3:42:40, Dst=-13nT, ap=7nTS=-1  
Flag\_F: 1105 Flag\_B: 0 Flag\_q: 0 Flag\_platform: 20 point number : 1105

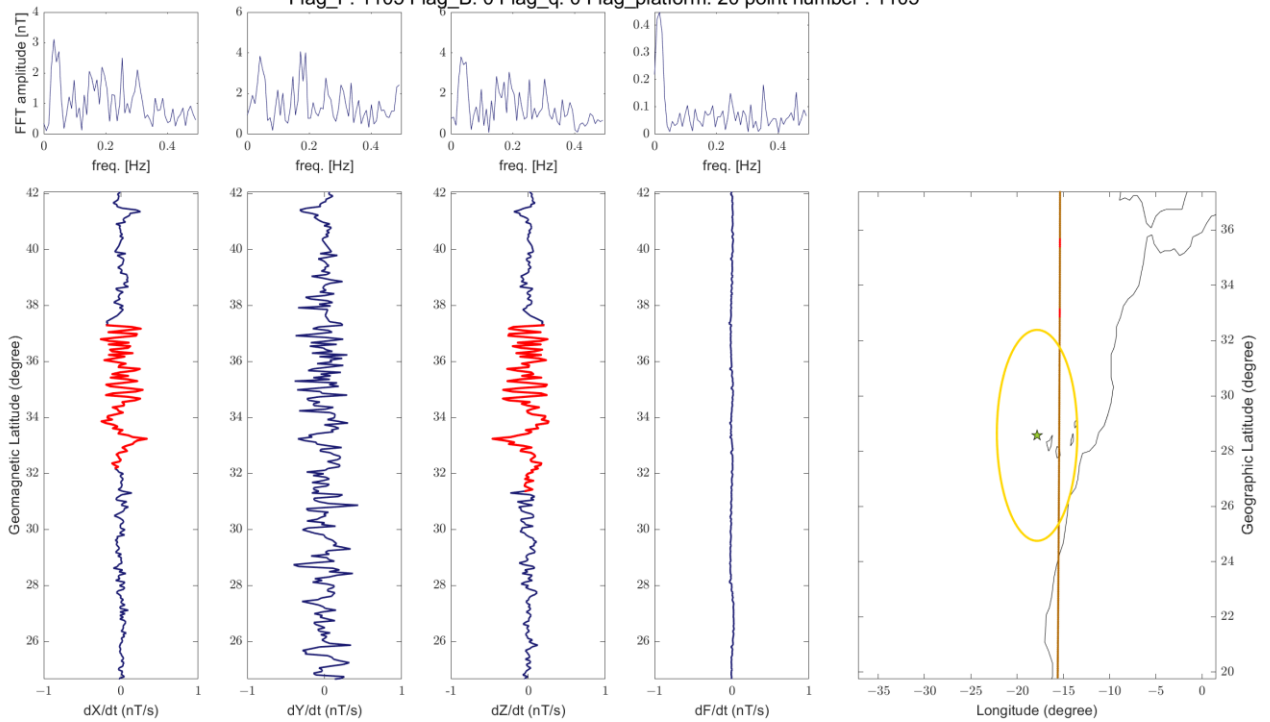

SAT.:B.Y/M/D:2021/7/26. Track n.:6 D.meanLT:2:15:14,meanUTC:3:37:52, Dst=-1nT, ap=4nTS=-1  
Flag\_F: 1105 Flag\_B: 0 Flag\_q: 0 Flag\_platform: 5 point number : 1105

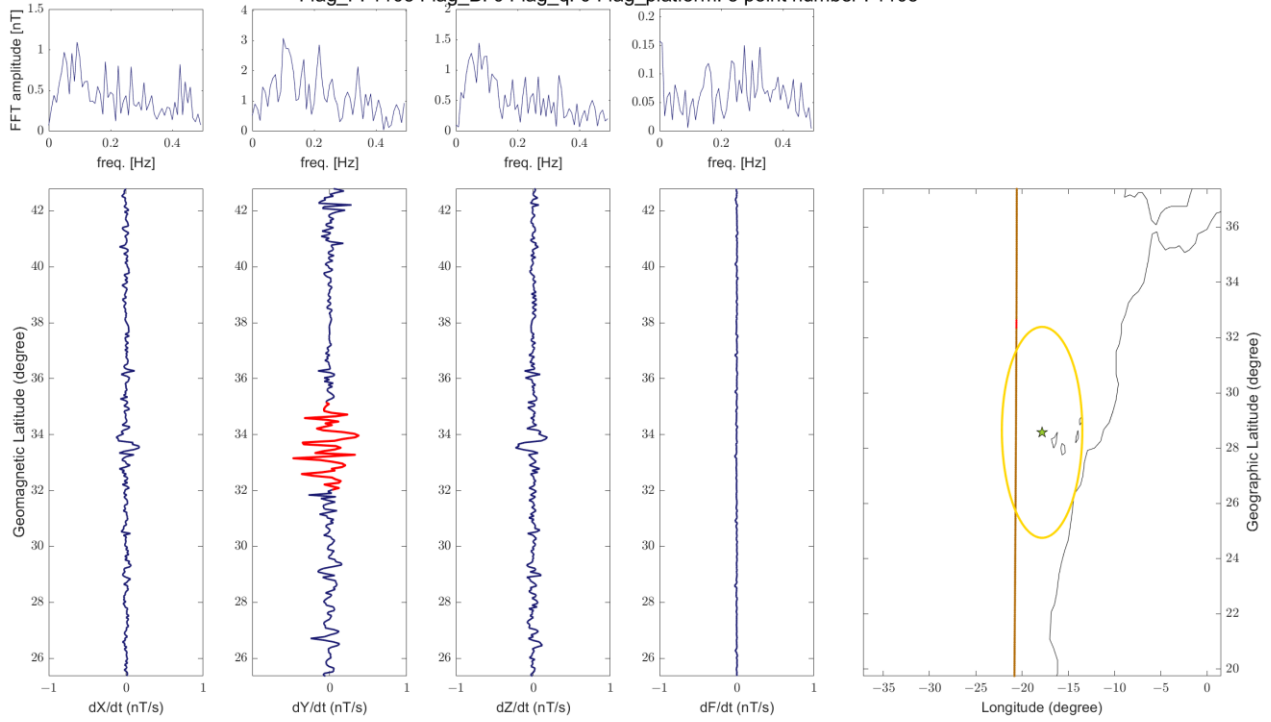

SAT.:B.Y/M/D:2021/7/26. Track n.:21 U.meanLT:14:22:27,meanUTC:15:43:2, Dst=5nT, ap=2nTS=-1  
Flag\_F: 1105 Flag\_B: 0 Flag\_q: 0 Flag\_platform: 15 point number : 1105

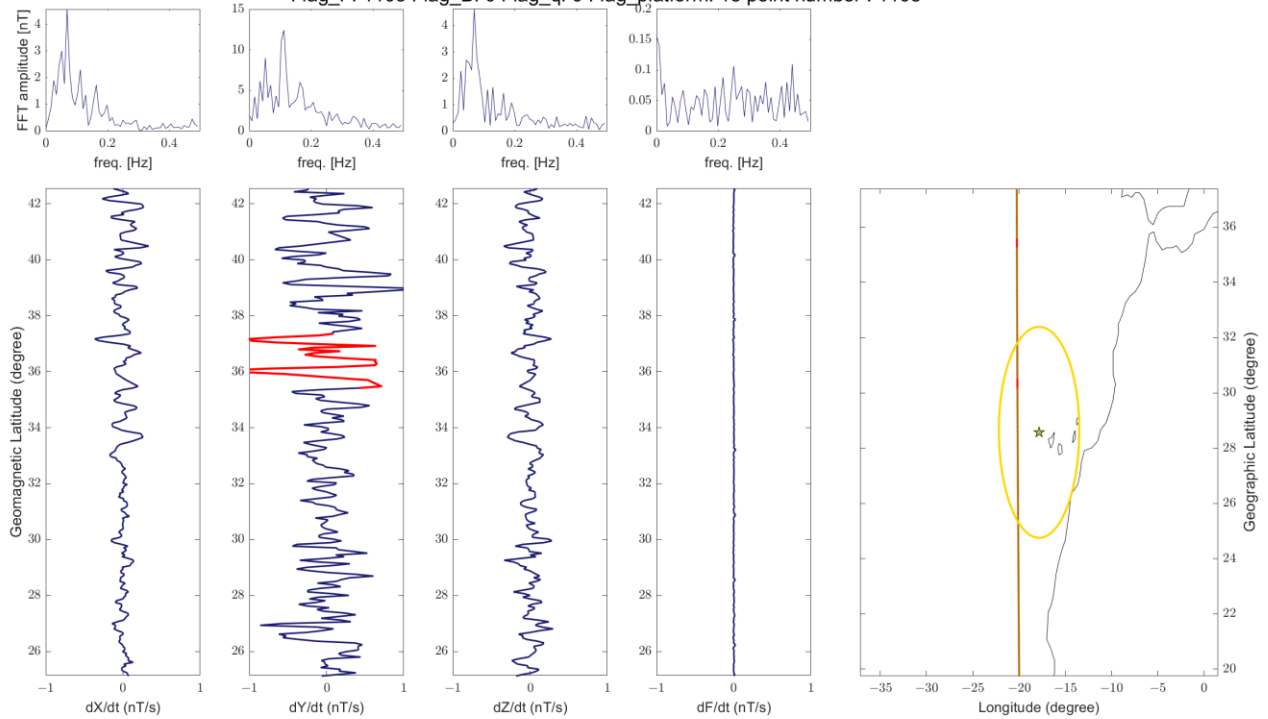

SAT.:B.Y/M/D:2021/8/2. Track n.:5 D.meanLT:1:39:26,meanUTC:2:53:14, Dst=-2nT, ap=4nTS=-1  
 Flag\_F: 1105 Flag\_B: 0 Flag\_q: 0 Flag\_platform: 15 point number : 1105

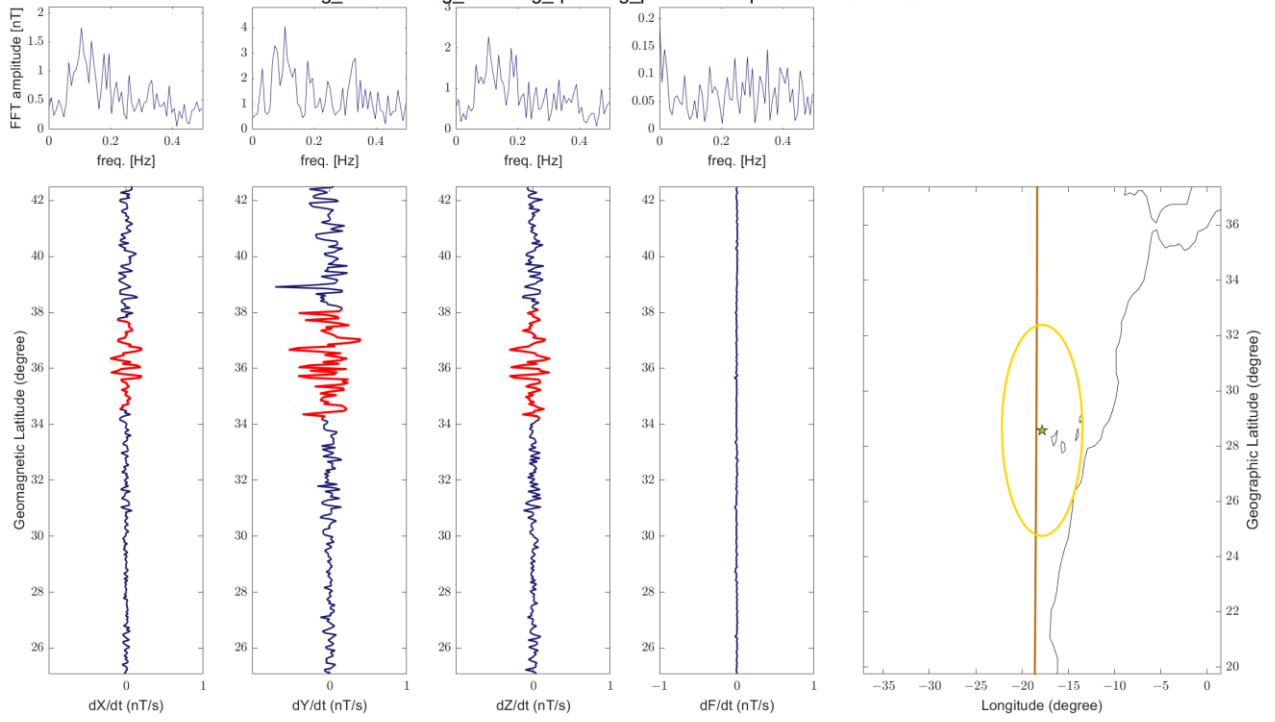

SAT.:C.Y/M/D:2021/8/12. Track n.:4 U.meanLT:1:13:0,meanUTC:2:33:5, Dst=2nT, ap=0nTS=-1  
 Flag\_F: 1088 Flag\_B: 0 Flag\_q: 0 Flag\_platform: 20 point number : 1088

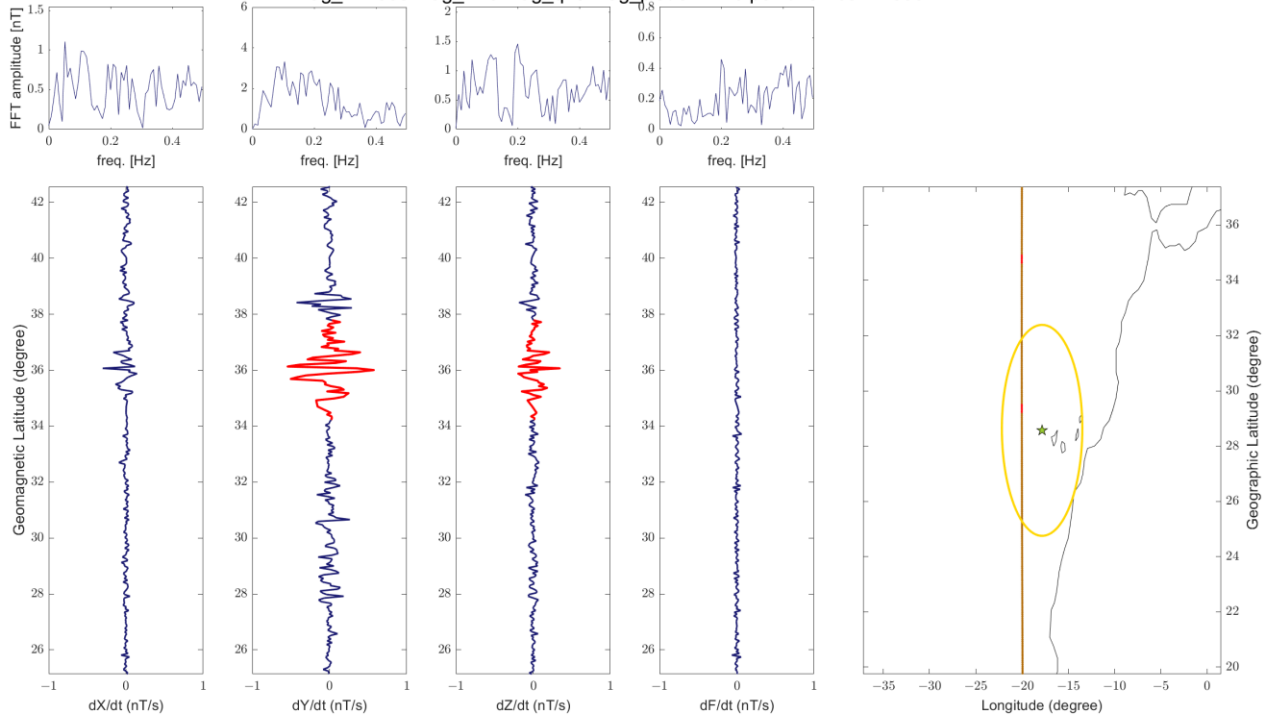

SAT.:A.Y/M/D:2021/8/12. Track n.:4 U.meanLT:1:12:34,meanUTC:2:33:9, Dst=2nT, ap=0nTS=-1

Flag\_F: 1088 Flag\_B: 0 Flag\_q: 0 Flag\_platform: 20 point number : 1088

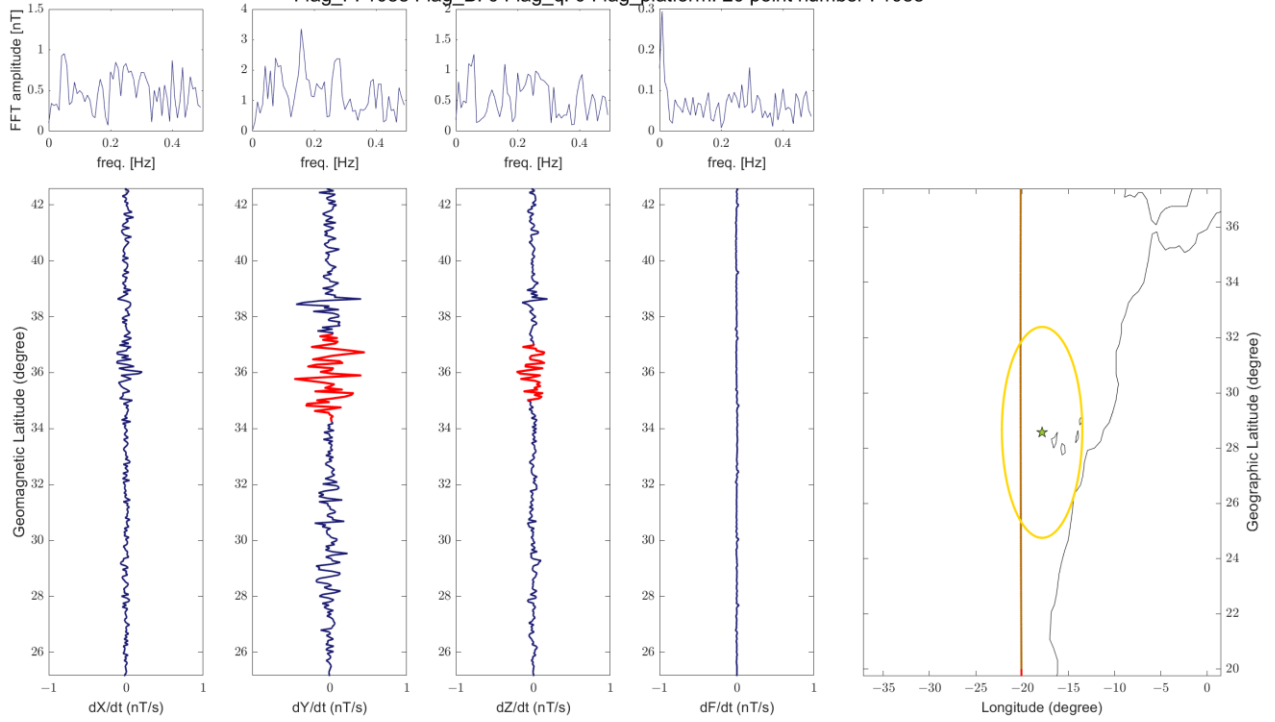

SAT.:B.Y/M/D:2021/8/15. Track n.:3 D.meanLT:0:32:54,meanUTC:1:43:46, Dst=-6nT, ap=9nTS=-1

Flag\_F: 56 Flag\_B: 0 Flag\_q: 0 Flag\_platform: 10 point number : 1104

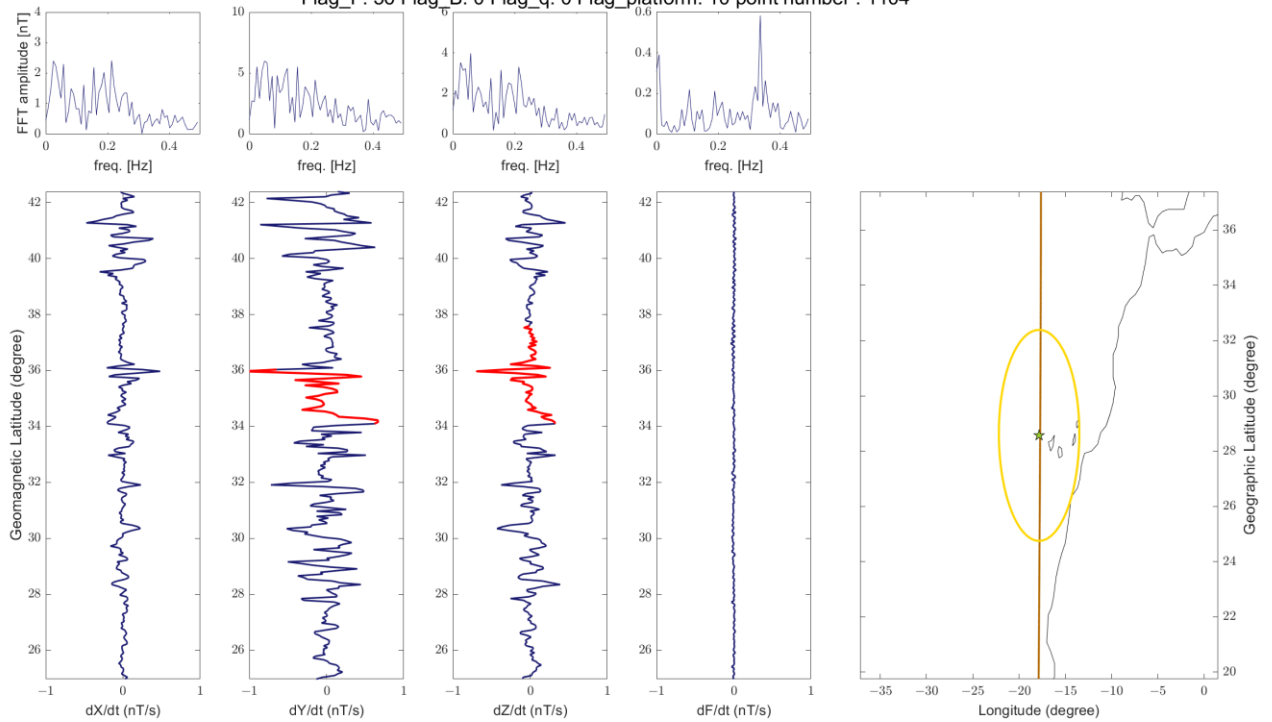

SAT.:A.Y/M/D:2021/8/19. Track n.:19 D.meanLT:12:20:44,meanUTC:13:44:53, Dst=-19nT, ap=5nTS=-1

Flag\_F: 1088 Flag\_B: 0 Flag\_q: 0 Flag\_platform: 10 point number : 1088

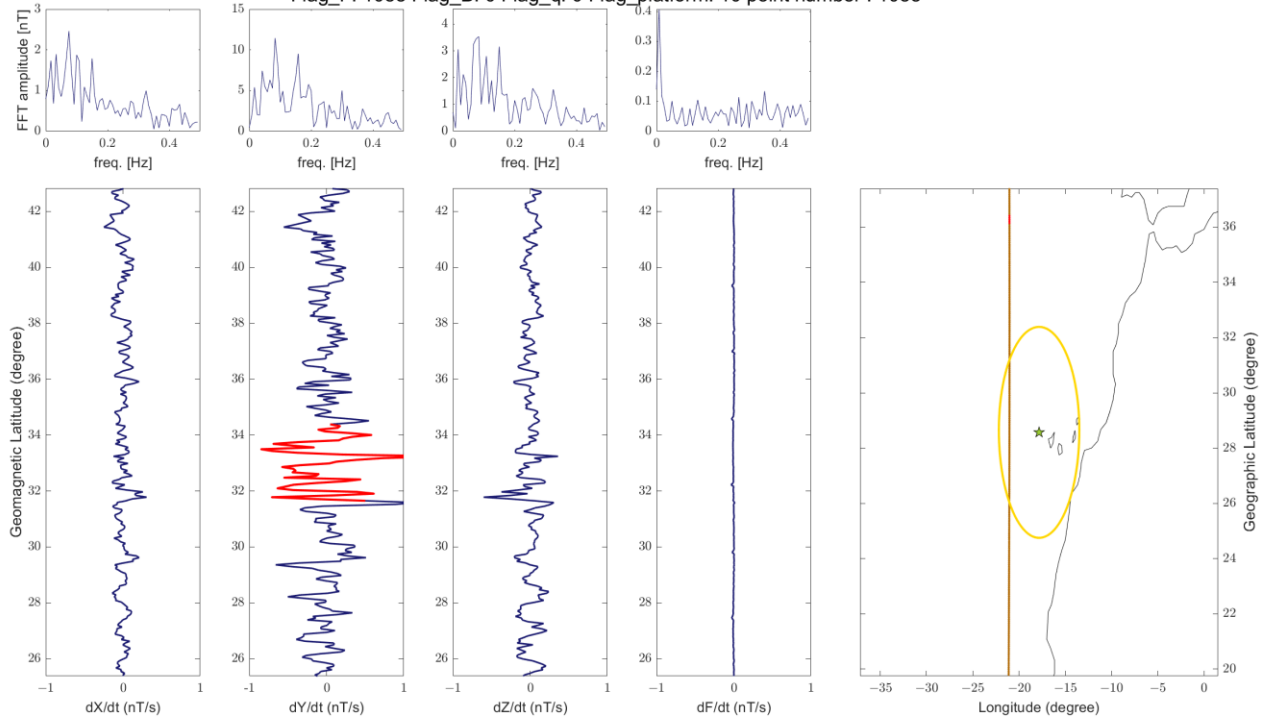

SAT.:C.Y/M/D:2021/8/20. Track n.:3 U.meanLT:0:29:56,meanUTC:1:38:49, Dst=-7nT, ap=0nTS=-1

Flag\_F: 1088 Flag\_B: 0 Flag\_q: 0 Flag\_platform: 30 point number : 1088

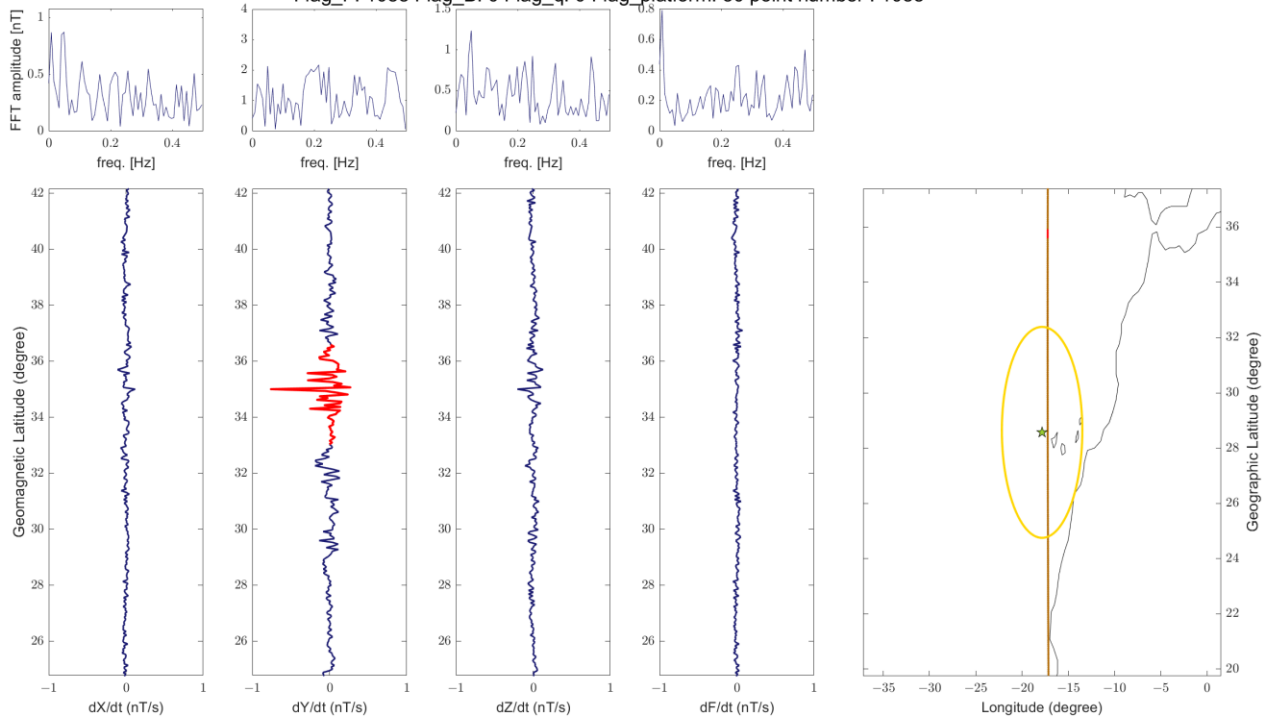

SAT.:A.Y/M/D:2021/8/20. Track n.:3 U.meanLT:0:29:34,meanUTC:1:38:53, Dst=-7nT, ap=0nTS=-1

Flag\_F: 1088 Flag\_B: 0 Flag\_q: 0 Flag\_platform: 10 point number : 1088

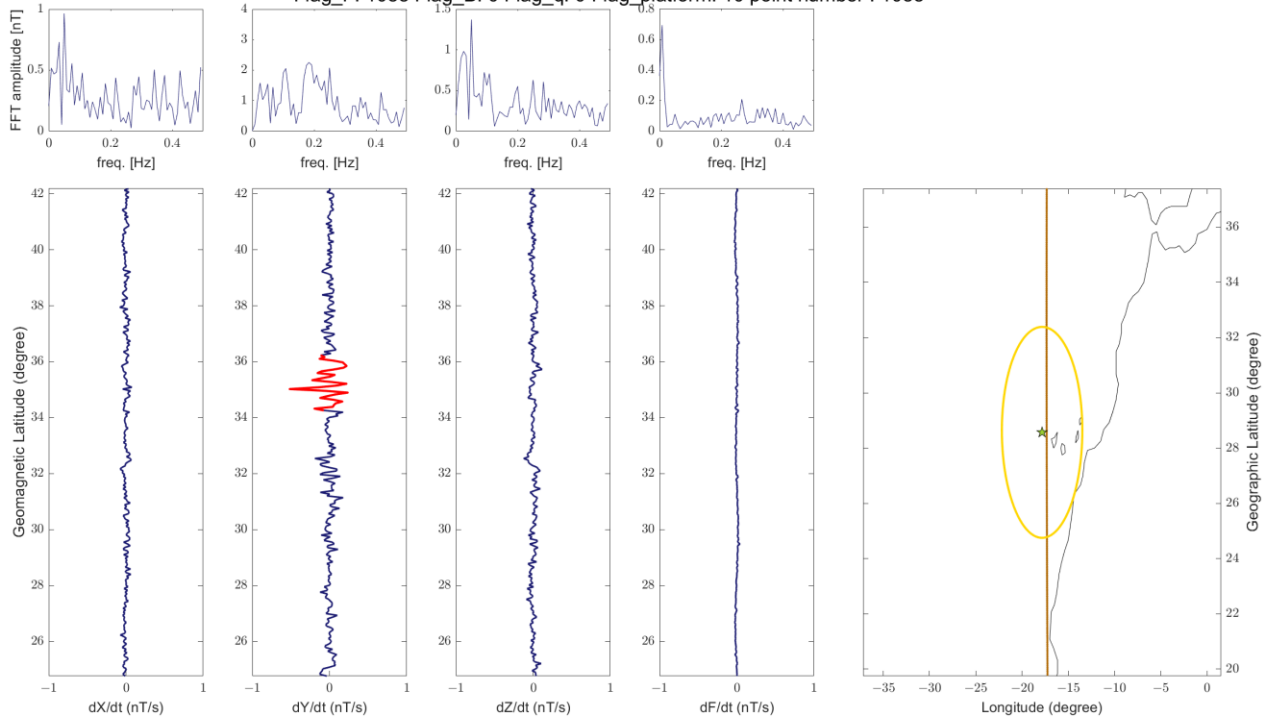

SAT.:A.Y/M/D:2021/8/22. Track n.:18 D.meanLT:12:4:39,meanUTC:13:12:50, Dst=1nT, ap=3nTS=-1

Flag\_F: 1088 Flag\_B: 0 Flag\_q: 0 Flag\_platform: 10 point number : 1088

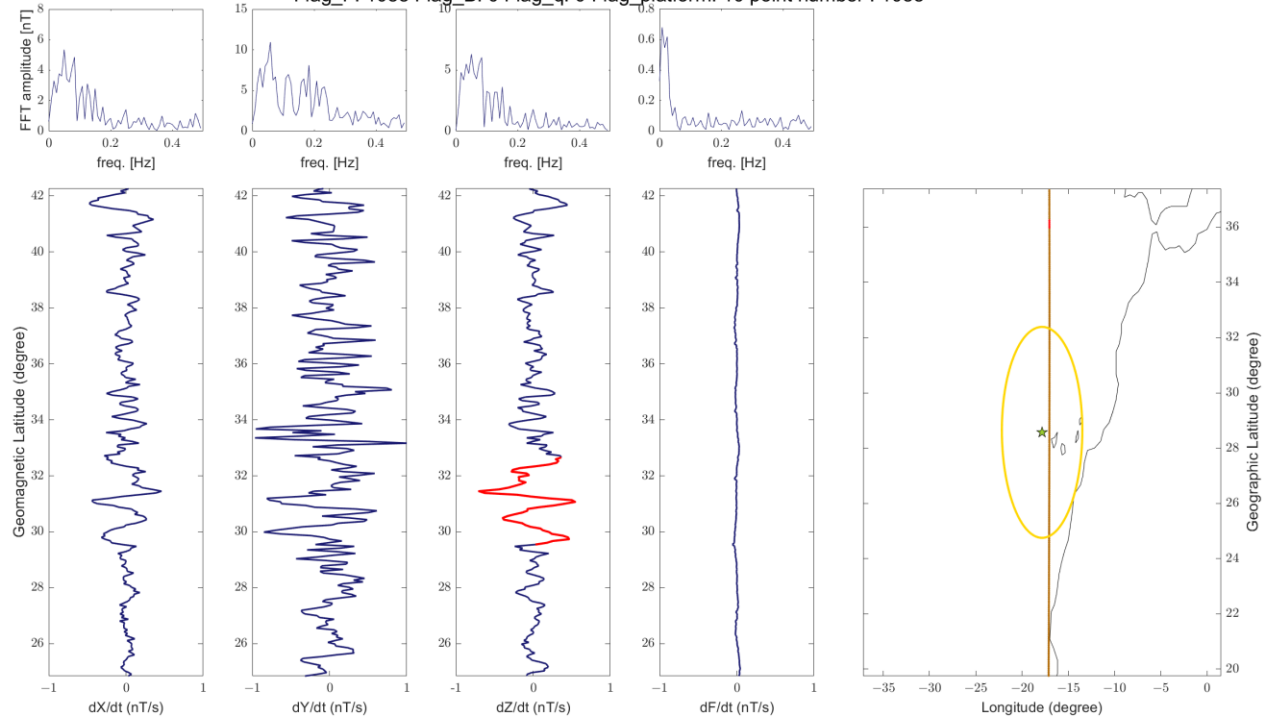

SAT.:C.Y/M/D:2021/9/2. Track n.:1 U.meanLT:23:19:56,meanUTC:0:21:51, Dst=-2nT, ap=3nTS=-1

Flag\_F: 1088 Flag\_B: 0 Flag\_q: 0 Flag\_platform: 10 point number : 1088

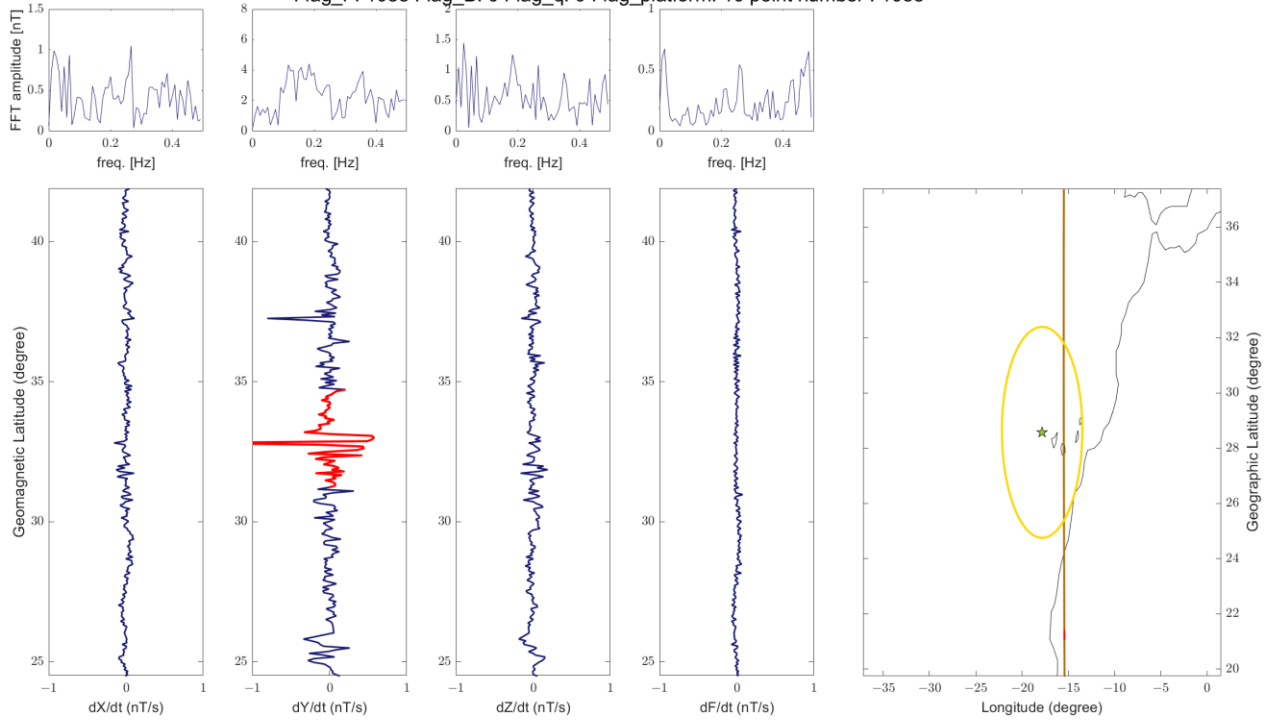

SAT.:A.Y/M/D:2021/9/2. Track n.:1 U.meanLT:23:19:40,meanUTC:0:21:55, Dst=-2nT, ap=3nTS=-1

Flag\_F: 1088 Flag\_B: 0 Flag\_q: 0 Flag\_platform: 20 point number : 1088

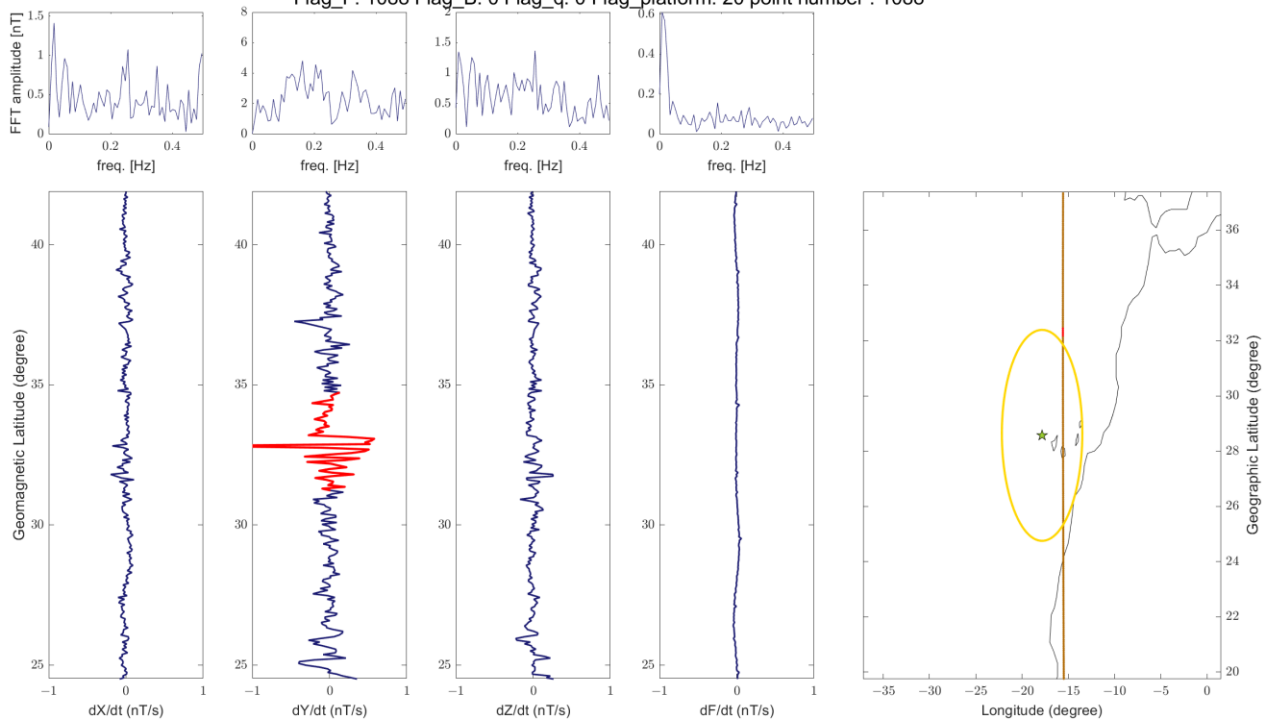

SAT.:B.Y/M/D:2021/9/2. Track n.:2 D.meanLT:23:0:41,meanUTC:0:29:12, Dst=-2nT, ap=3nTS=-1

Flag\_F: 1105 Flag\_B: 0 Flag\_q: 0 Flag\_platform: 20 point number : 1105

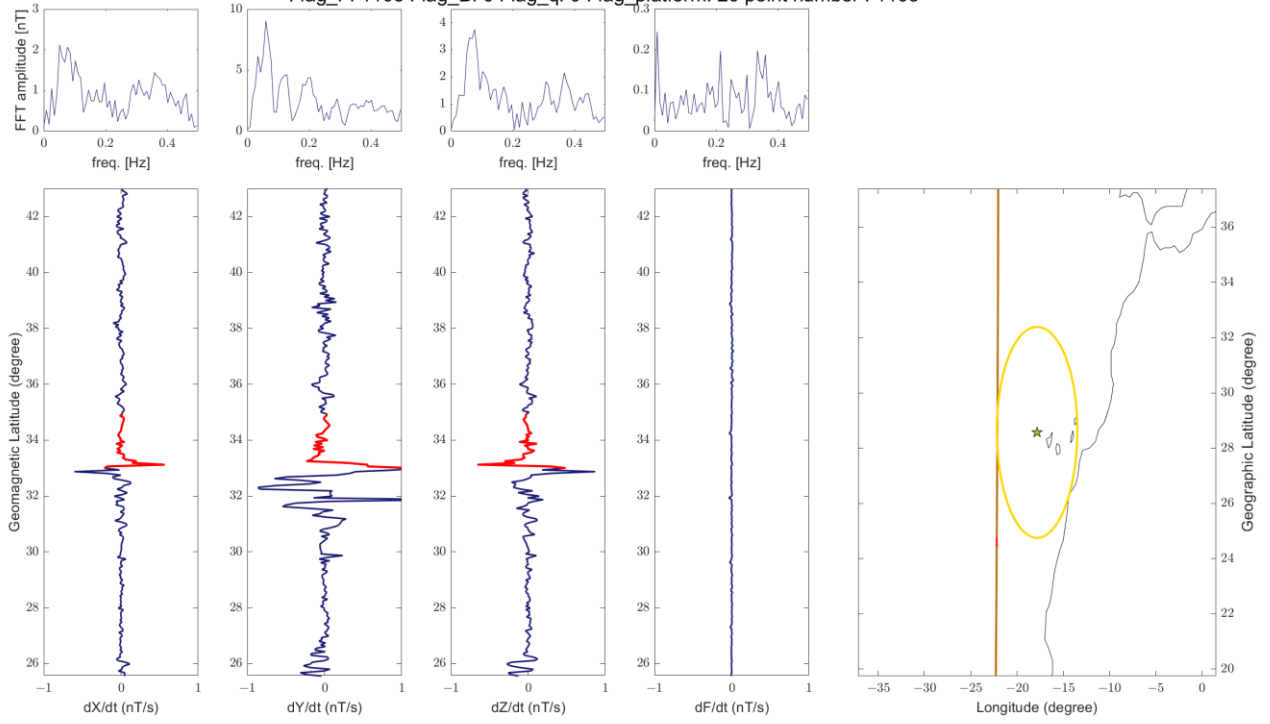

SAT.:A.Y/M/D:2021/9/6. Track n.:17 D.meanLT:10:43:55,meanUTC:12:5:19, Dst=9nT, ap=4nTS=-1

Flag\_F: 1088 Flag\_B: 0 Flag\_q: 0 Flag\_platform: 34 point number : 1088

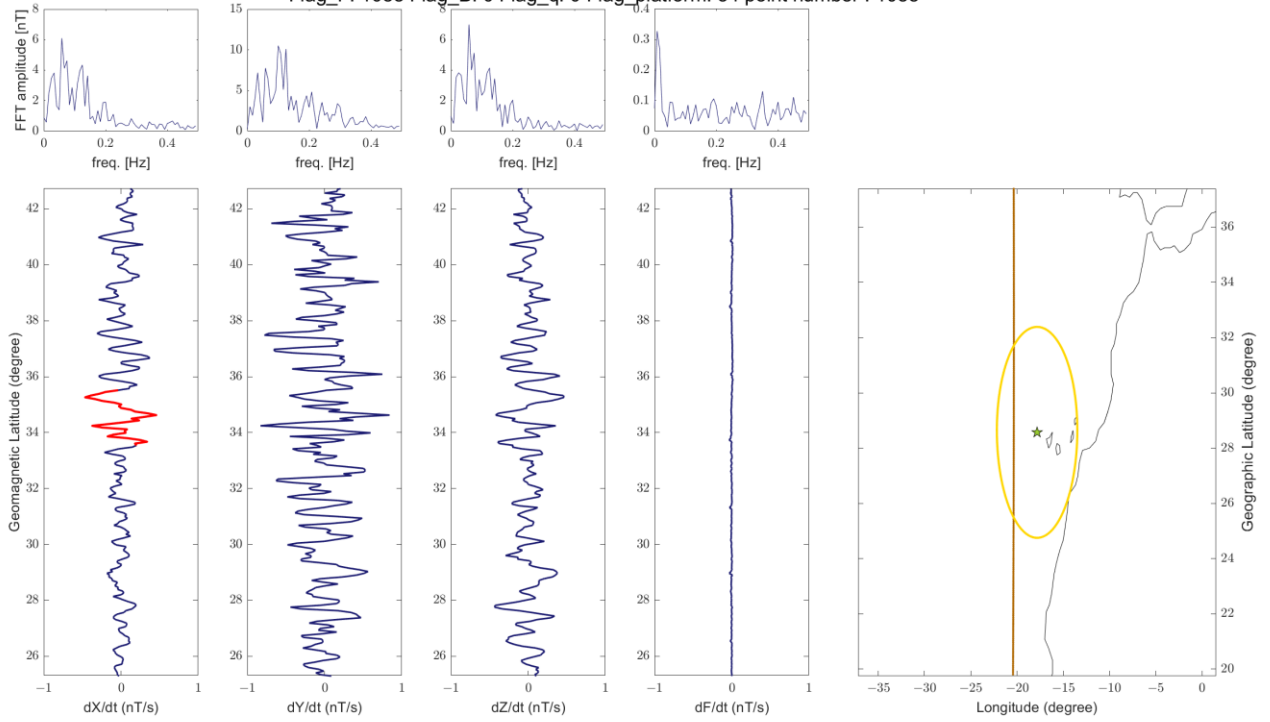

SAT.:C.Y/M/D:2021/9/6. Track n.:32 U.meanLT:22:52:52,meanUTC:23:59:7, Dst=-2nT, ap=7nTS=-1

Flag\_F: 589 Flag\_B: 0 Flag\_q: 0 Flag\_platform: 5 point number : 589

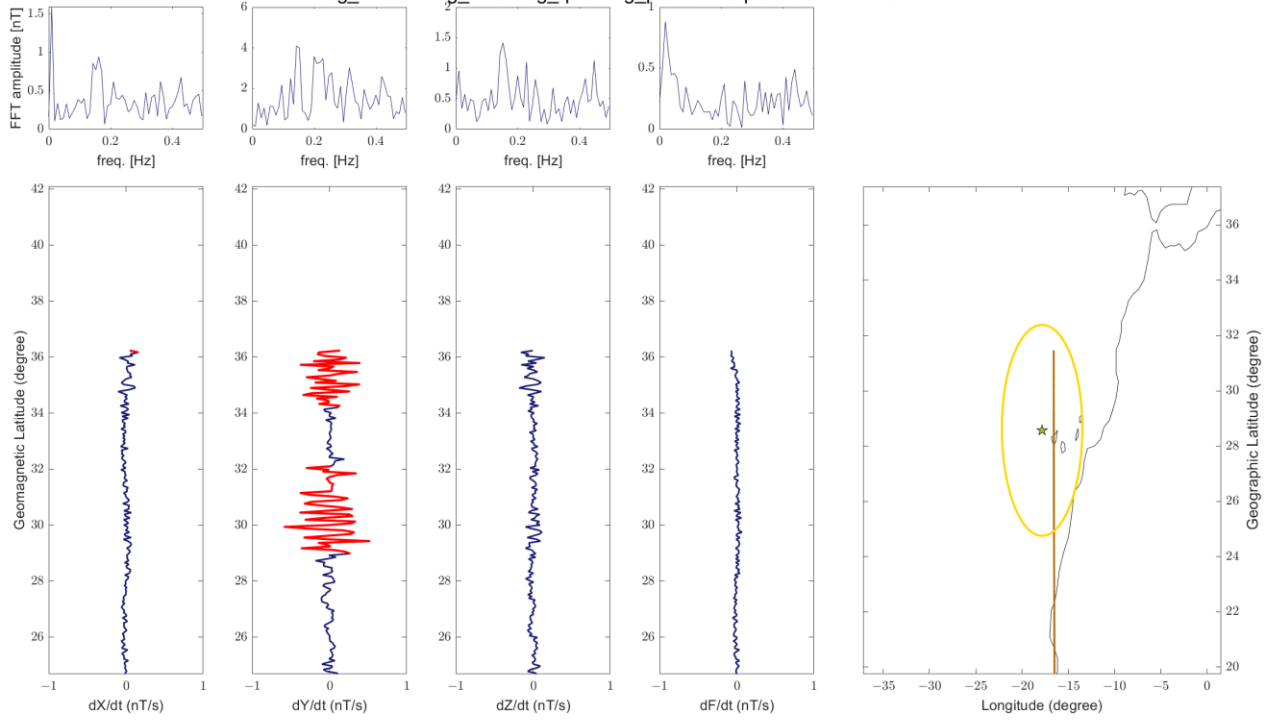

SAT.:B.Y/M/D:2021/9/8. Track n.:31 D.meanLT:22:24:52,meanUTC:23:44:19, Dst=-11nT, ap=4nTS=-1

Flag\_F: 56 Flag\_B: 0 Flag\_q: 0 Flag\_platform: 35 point number : 1105

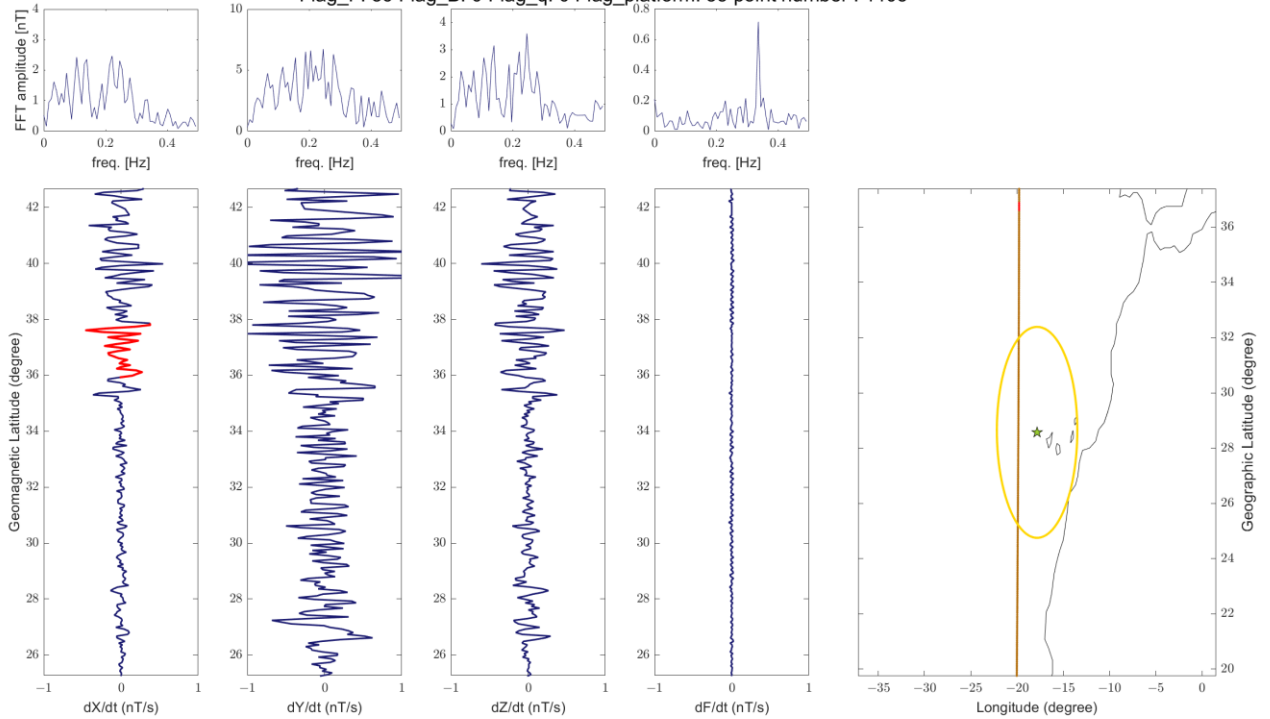

SAT.:C.Y/M/D:2021/9/11. Track n.:31 U.meanLT:22:26:1,meanUTC:23:36:30, Dst=2nT, ap=6nTS=-1  
 Flag\_F: 1088 Flag\_B: 0 Flag\_q: 0 Flag\_platform: 10 point number : 1088

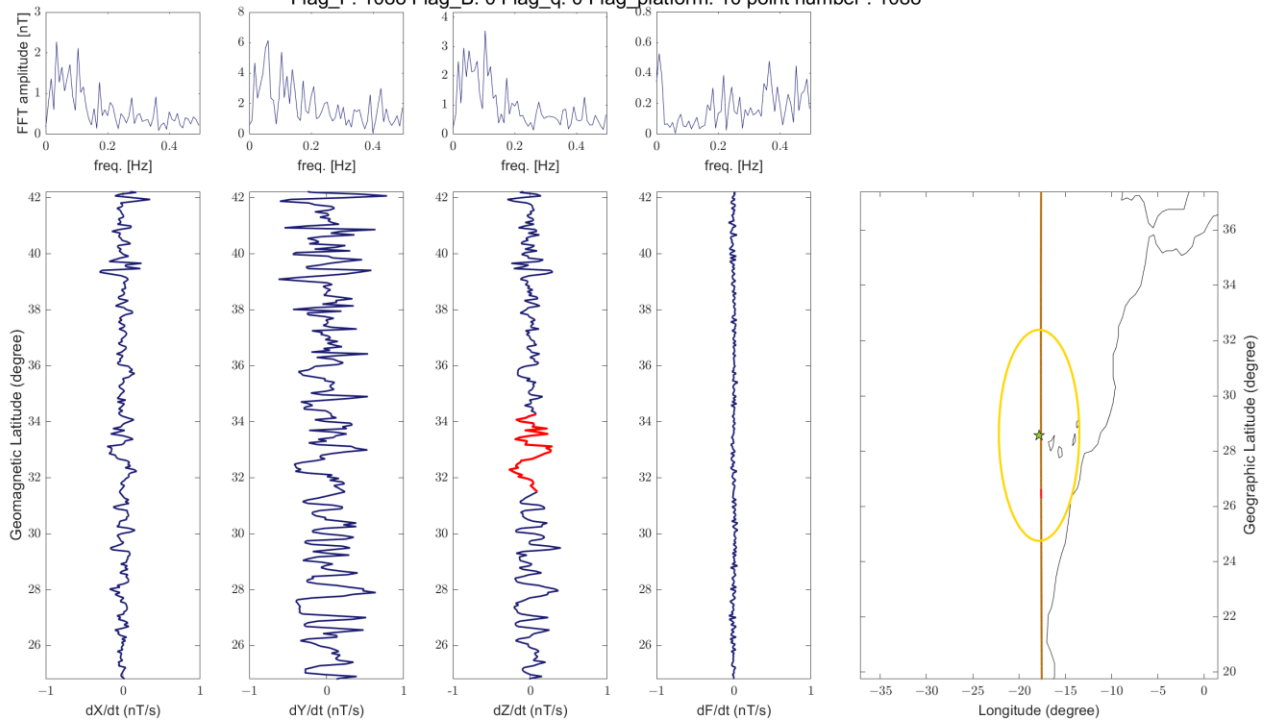

SAT.:A.Y/M/D:2021/9/11. Track n.:31 U.meanLT:22:25:50,meanUTC:23:36:34, Dst=2nT, ap=6nTS=-1  
 Flag\_F: 1088 Flag\_B: 0 Flag\_q: 0 Flag\_platform: 20 point number : 1088

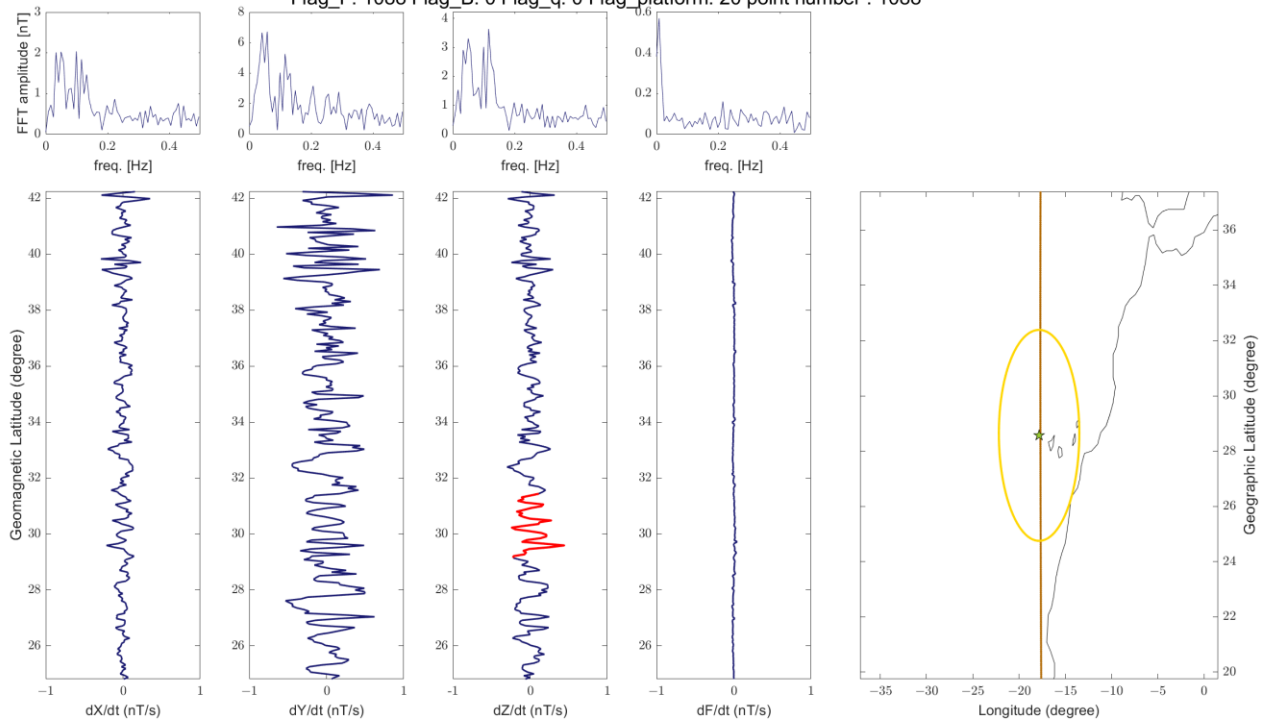

SAT.:A.Y/M/D:2021/9/14. Track n.:15 D.meanLT:10:0:54,meanUTC:11:10:16, Dst=-4nT, ap=6nTS=-1  
Flag\_F: 85 Flag\_B: 0 Flag\_q: 0 Flag\_platform: 10 point number : 1088

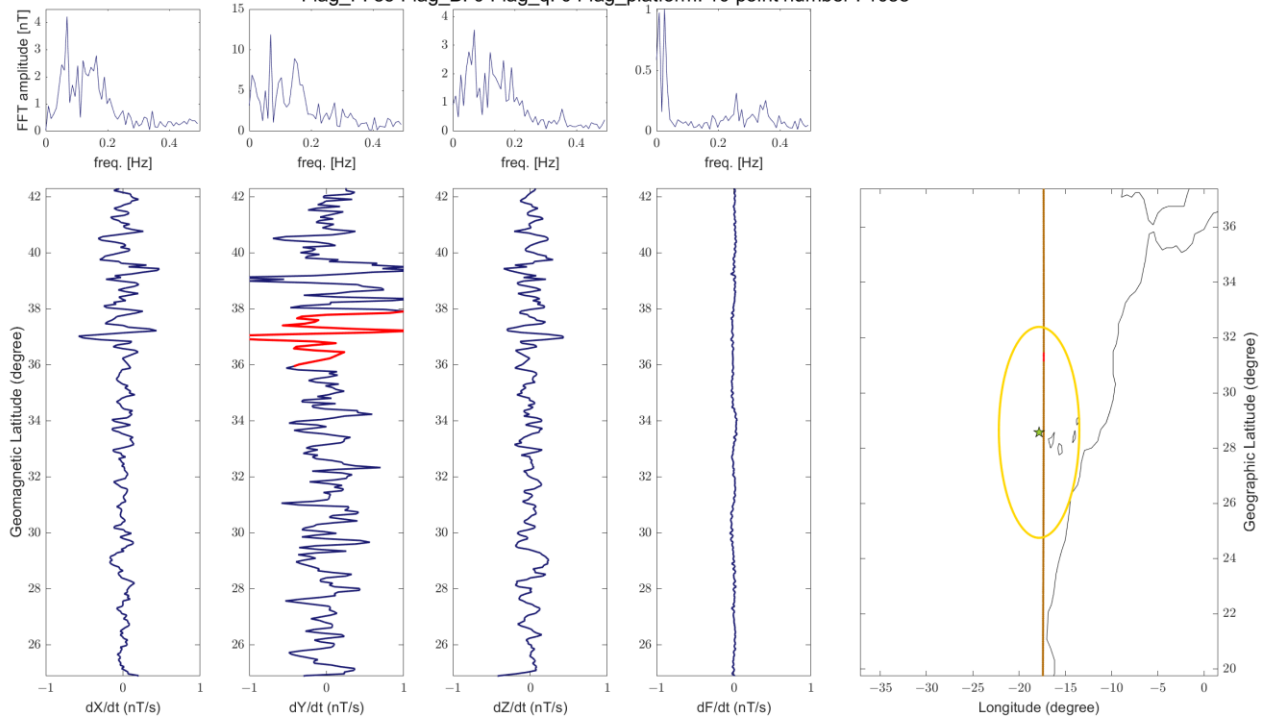

SAT.:B.Y/M/D:2021/9/14. Track n.:31 D.meanLT:21:54:8,meanUTC:23:19:20, Dst=-5nT, ap=3nTS=-1  
Flag\_F: 1105 Flag\_B: 0 Flag\_q: 0 Flag\_platform: 24 point number : 1105

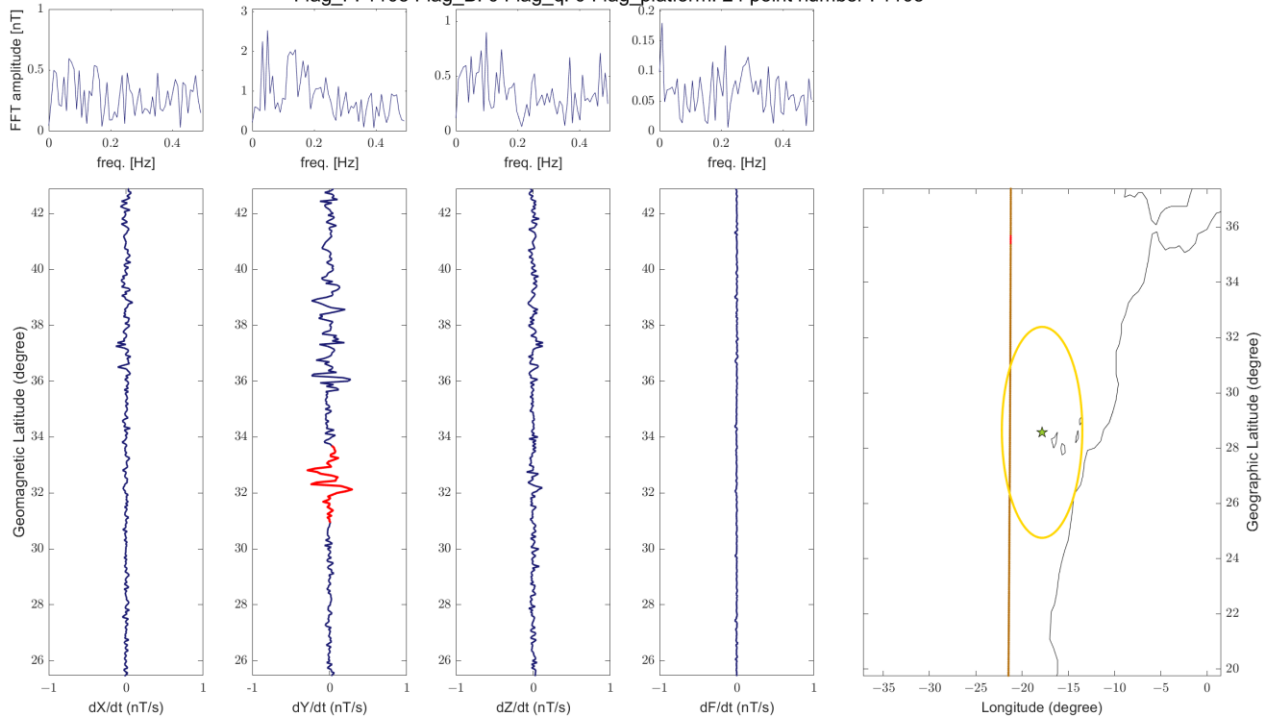

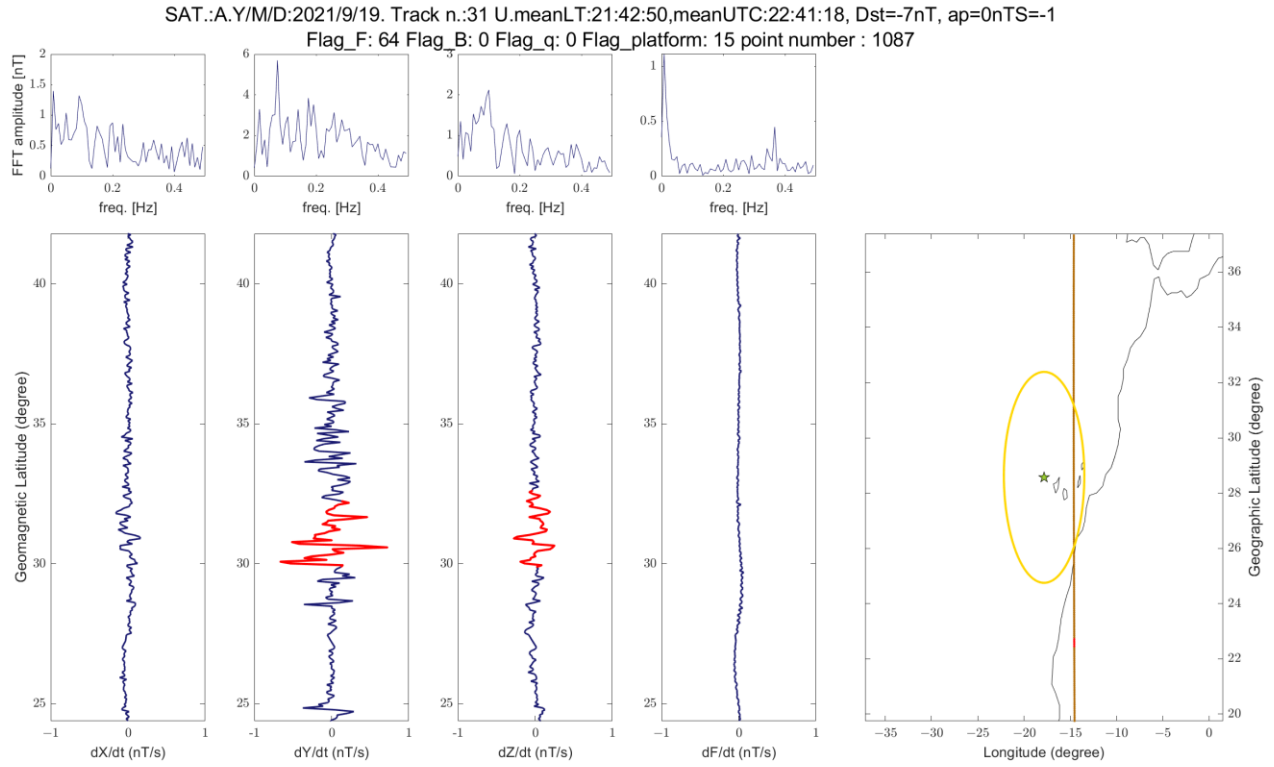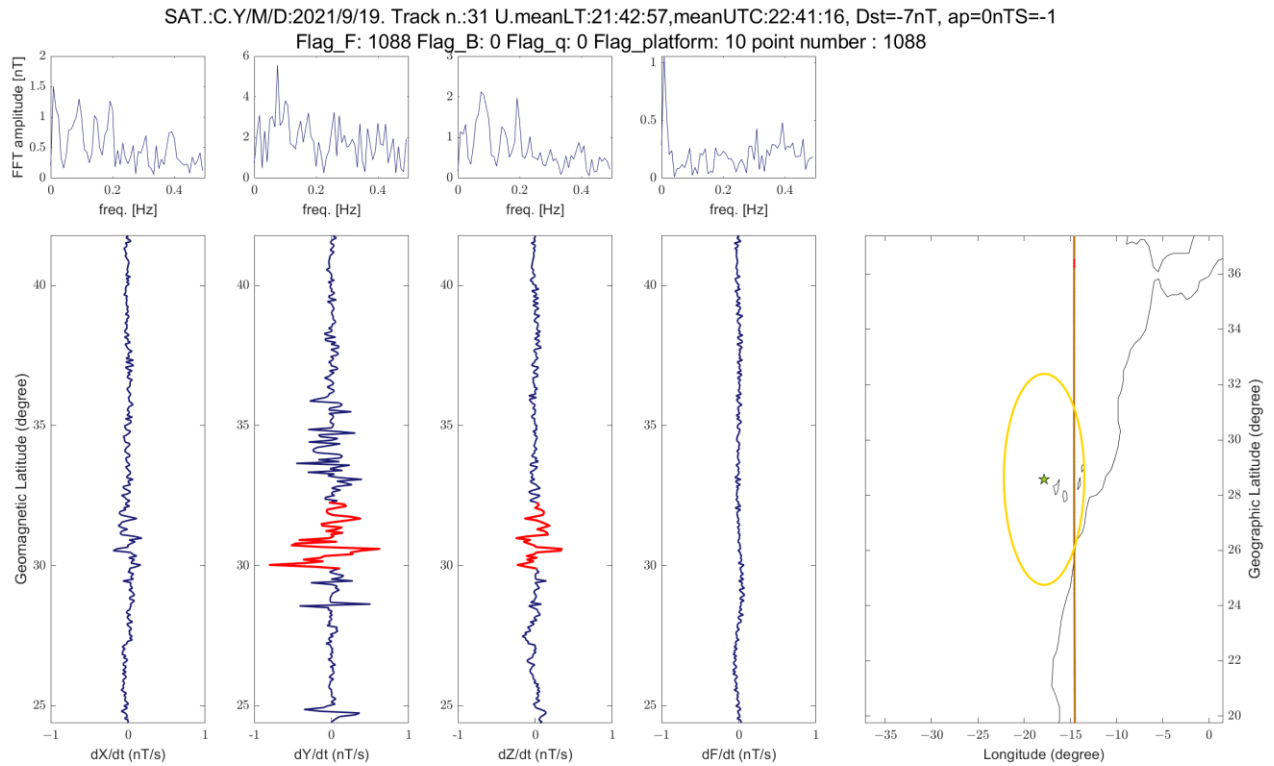

Supplement: s1 [file s1 › La Palma Second Supplementary Materials.pdf]
