# Supplementary material for: Clues of Lithosphere, Atmosphere and Ionosphere Variations Possibly Related to the Preparation of La Palma 19 September 2021 Volcano Eruption
Source: MDPI journal article supplement (doi:10.3390/rs14195001), 2022-10-08
Supplement: s1 [file s1]

Archive with 3 entries (3 files):
- Animation_SO2_1991_june_july_v3.gif
- La Palma First Supplementary Materials.pdf
- La Palma Second Supplementary Materials.pdf
