# Supplementary figures and images for: Clues of Lithosphere, Atmosphere and Ionosphere Variations Possibly Related to the Preparation of La Palma 19 September 2021 Volcano Eruption
Source: MDPI journal article supplement (doi:10.3390/rs14195001), 2022-10-08

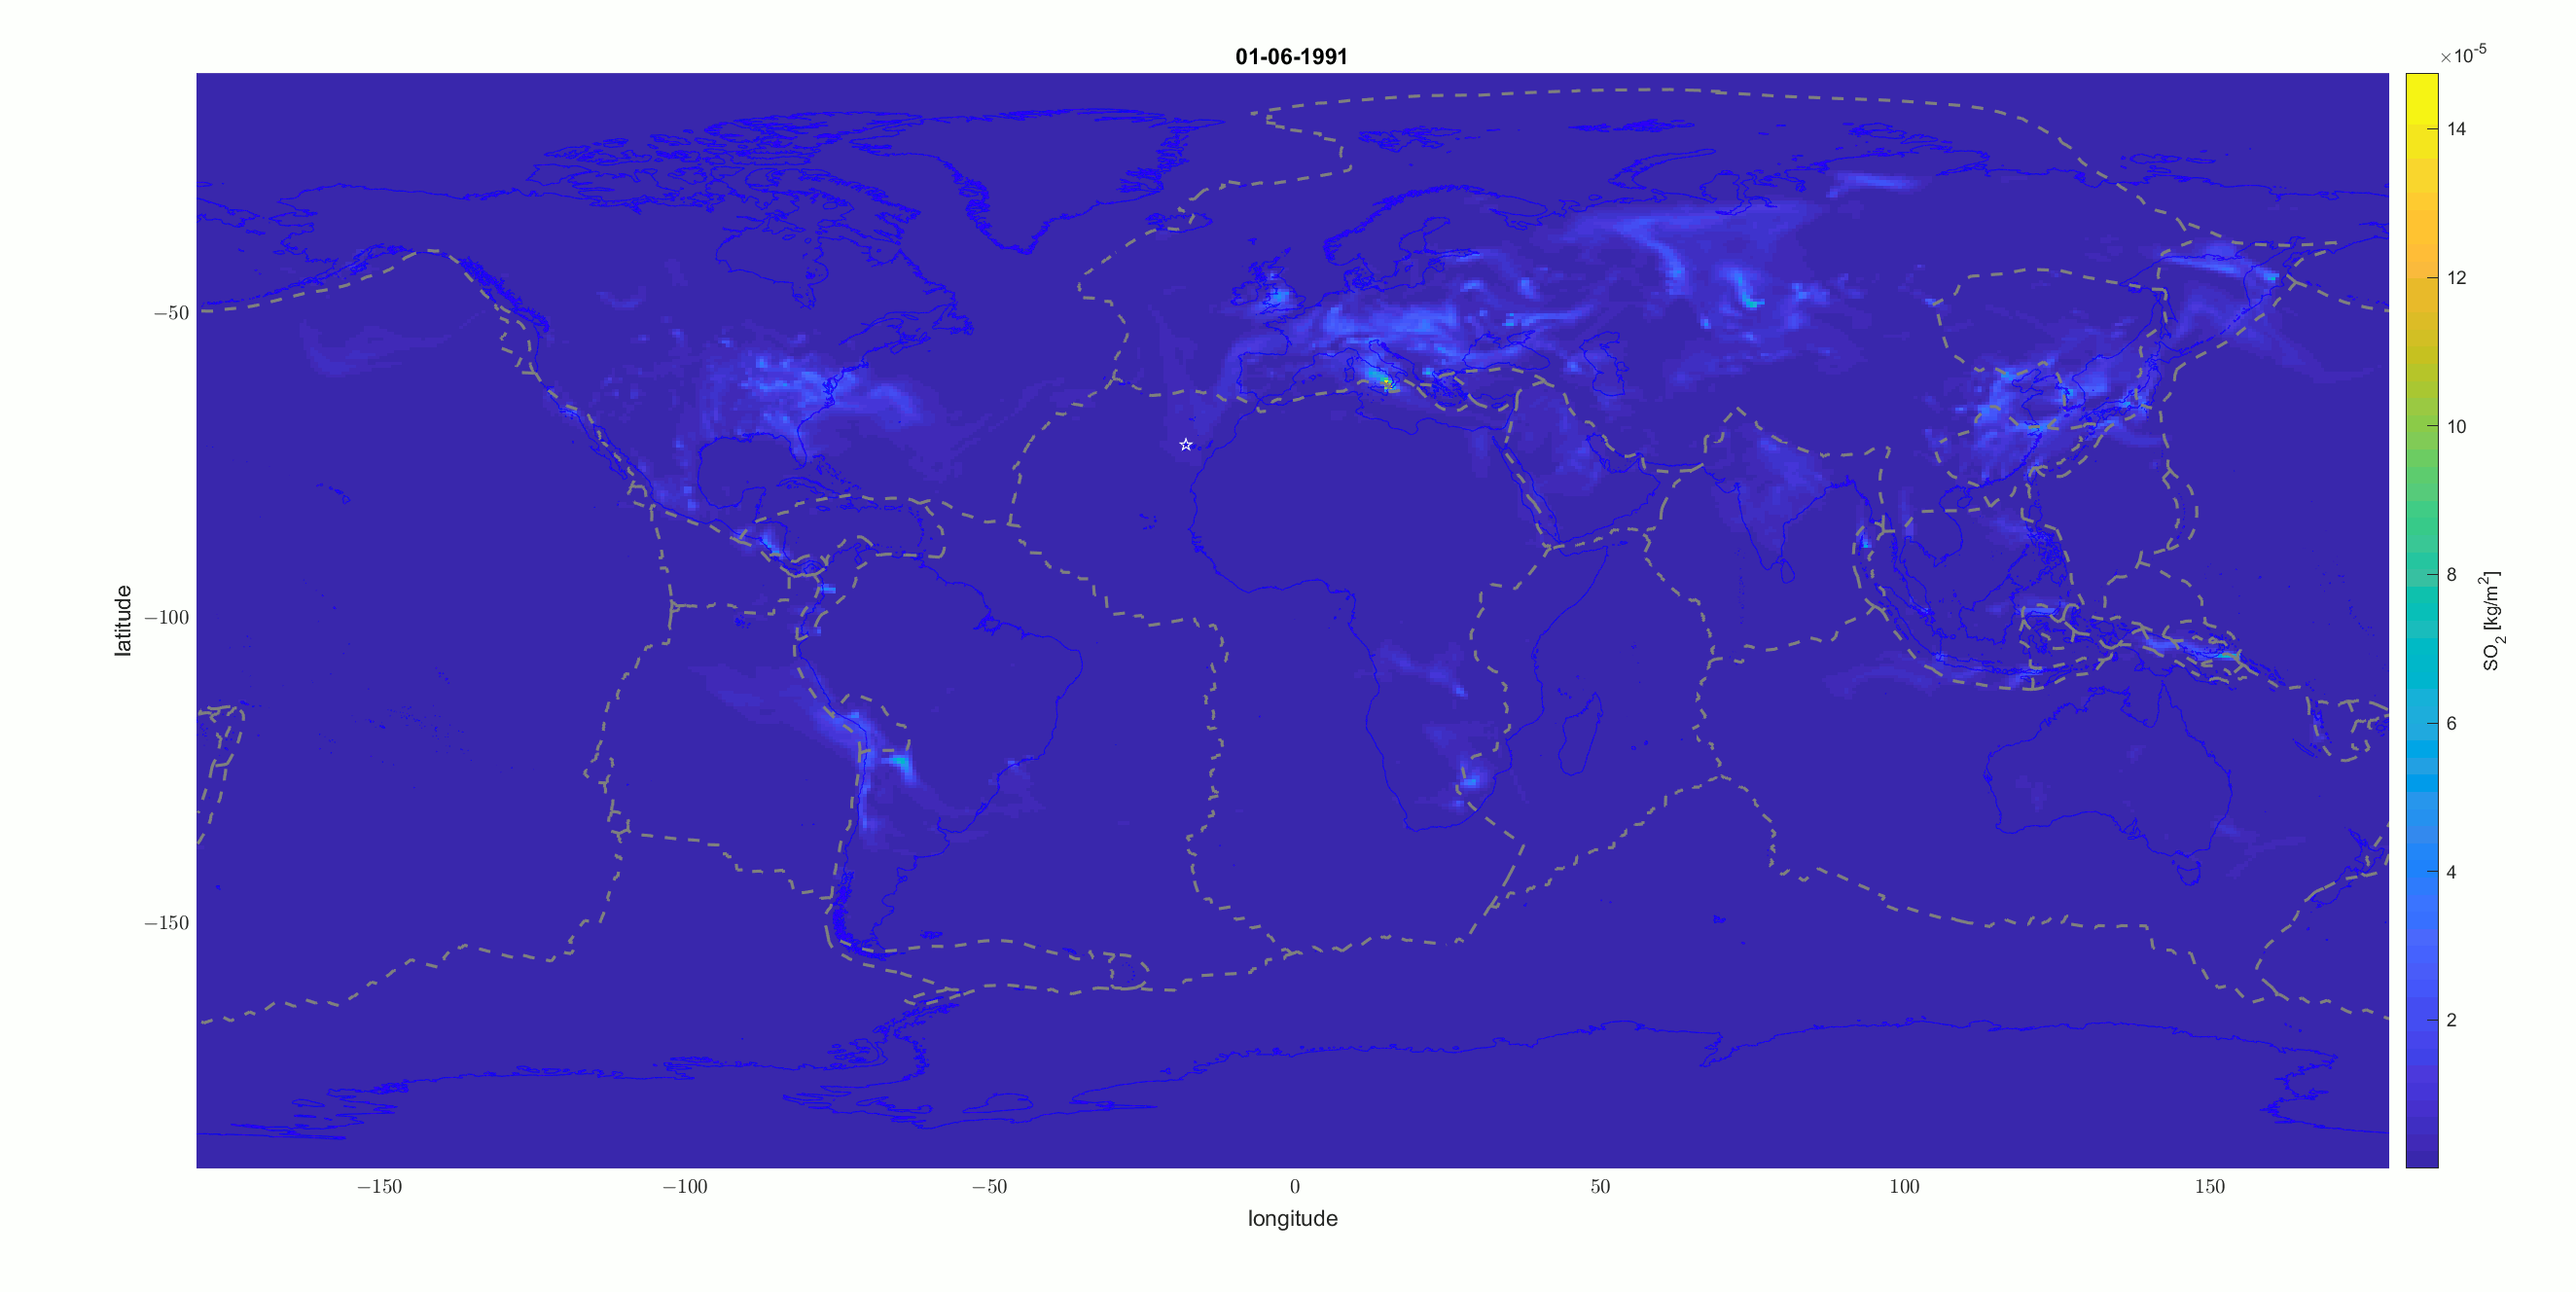

Supplement: s1 [file s1 › Animation_SO2_1991_june_july_v3.gif]
